# Supplementary material
Source: publisher figshare collection journal article supplement (https://acs.figshare.com/ndownloader/files/4518979)

## **Supporting information**

# **Total Synthesis of the Antiproliferative Macrolide (+)-Neopeltolide**

*Xavier Guinchard, Emmanuel Roulland\**

Centre de Recherche CNRS de Gif-sur-Yvette,  
Institut de Chimie des Substances Naturelles,  
Avenue de la Terrasse, 91198 Gif-sur-Yvette, France.

Fax: (+33) 1-6907-7247

E-mail: [emmanuel.roulland@icsn.cnrs-gif.fr](mailto:emmanuel.roulland@icsn.cnrs-gif.fr)

Homepage : <http://www.icsn.cnrs-gif.fr>

## General Experimental Procedures

**$^1\text{H}$  NMR-Spectra** (300 or 500 MHz),  **$^{13}\text{C}$  NMR-spectra** (75 MHz) spectra were recorded on Brüker spectrometers. Chemical shifts are given in ppm ( $\delta$ ) and were referenced to the internal solvent signal or to TMS used as an internal standard ( $^1\text{H}$  and  $^{13}\text{C}$  NMR). Multiplicities are declared as follow: *s* (singlet), *br s* (broad singlet), *d* (doublet), *t* (triplet), *q* (quadruplet), *quint* (quintuplet), *sept* (septet), *dd* (doublet of doublet), *ddd* (doublet of doublet of doublet), *dt* (doublet of triplet), *m* (multiplet). Coupling constants *J* are given in Hz.

**Infrared spectra** (IR) were recorded on a Perkin-Elmer FT-IR system using diamond window Dura SamplIR II and the data are reported in reciprocal centimetres ( $\nu$ ,  $\text{cm}^{-1}$ ).

**Mass spectra** were recorded on a Micromass LCT (ESI).

**Reactions** were performed using oven dried glasswares under an atmosphere of dry argon. Silica gel 60 (35-70  $\mu\text{m}$ ) was used for flash chromatography. Silica gel (5  $\mu\text{m}$ ) was used for HPLC. TLC plates (Merck 60 F<sub>254</sub> aluminum sheets) were rendered visible by ultraviolet and/or spraying with phosphomolybdic acid (5%) in MeOH or vanillin (1%) + sulfuric acid (5%) in EtOH followed by heating.

**Solvents:** Tetrahydrofuran was distilled under Argon on sodium-benzophenone. Dichloromethane was distilled under Argon on  $\text{CaH}_2$ . Unless otherwise noted, all reagent-grade chemicals and solvents were obtained from commercial suppliers (Sigma-Aldrich, Acros Organics and Avocado) and were used as received.

**Optical rotations** were measured on a JASCO P-1010 polarimeter.  $[\alpha]_{\text{D}}^{20}$  is expressed in  $\text{deg} \cdot \text{cm}^3 \cdot \text{g}^{-1} \cdot \text{dm}^{-1}$  and *c* is expressed in  $\text{g}/100 \text{ cm}^3$ .

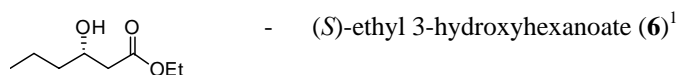

To a stirred solution of  $[\text{Ru}(\text{cod})(\text{MeCHMeCH}_2)_2]$  (45 mg, 0.14 mmol), (*S*)-Synphos (100 mg, 0.15 mmol) in acetone (15 mL) was added dropwise an HBr solution in MeOH (1.72 mL, 0.18 M, prepared by reaction at 0 °C of AcBr (135  $\mu\text{L}$ , 1.8 mmol) with 10 mL of MeOH). The resulting mixture was stirred at room temperature for 30 min and then acetone was removed under vacuum. The activated catalyst was used directly and added to a solution of ketoester **5** (8.88 g, 56.2 mmol) in EtOH (60 mL). Argon was purged and replaced by hydrogen and the mixture was then heated at 50 °C under 4 bars of  $\text{H}_2$  pressure during 10 h. After cooling, the solvent was removed under vacuum and the residue was purified by MPLC (EtOAc/heptane 1/3) yielding ethyl ester **6** (7.78

---

(1) Prepared according to the procedure described in: Duprat de Paule, S.; Jeulin, S.; Ratovelomanana-Vidal, V.; Genêt, J.-P.; Champion, N.; Dellis, P. *Eur. J. Org. Chem.* **2003**, 1931.

g, 48.65 mmol, 87%) as a colorless oil. The spectroscopical data of which correspond to those reported in the literature.  $[\alpha]_D^{25} = +8.2$  (neat,  $\text{CHCl}_3$ ), *lit.*<sup>2</sup>  $[\alpha]_D^{20} = +8.6$  (neat,  $\text{CHCl}_3$ ).

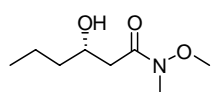

- (S)-3-hydroxy-N-methoxy-N-methylhexanamide (**7**)

$\text{MeONHMe.HCl}$  (7.05 g, 72 mmol) was dissolved in THF (30 mL) at  $-10\text{ }^\circ\text{C}$  and a solution of  $\text{AlMe}_3$  (2M solution, 36 mL, 72 mmol) was added via syringe over a 30 min period. The reaction mixture was stirred at room temperature for 45 min and then a THF solution (30 mL) of ester **6** (5.23 g, 32.72 mmol) was added and the resulting mixture was stirred at room temperature for 2 h. The reaction was then quenched by a careful addition of a saturated  $\text{NH}_4\text{Cl}$  aqueous solution followed by an addition of EtOAc and by an aqueous saturated solution of Rochelle salt. The resulting mixture was stirred overnight, then the phases were separated and the aqueous phase was extracted by EtOAc twice. Combined organic phases were dried over anhydrous  $\text{Na}_2\text{SO}_4$ , filtered, and evaporated. The amide **7** was obtained as a colorless oil (5.70 g, 32.60 mmol, 100%), the spectroscopical data of which corresponding to those reported in the literature.<sup>3</sup>  $[\alpha]_D^{20} = +55.3$  (*c* 1.72,  $\text{CHCl}_3$ ) and was used in the next step with no further purification

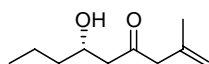

- (S)-6-hydroxy-2-methylnon-1-en-4-one (**8**)

To a solution of amide **7** (9.5 g, 54.28 mmol) in THF (400 mL) under argon at  $-78\text{ }^\circ\text{C}$  was added a solution of methallylmagnesium bromide in  $\text{Et}_2\text{O}$  (prepared by reaction of Mg (19.50 g, 814 mmol) with 2-chloro-2-methylpropene (24.43 g, 271.4 mmol) in  $\text{Et}_2\text{O}$  (400 mL)), via cannula over a 30 min period. The resulting mixture was allowed to reach  $-10\text{ }^\circ\text{C}$  overnight and then was quenched by addition of a saturated aqueous solution of  $\text{NH}_4\text{Cl}$ . After extraction by EtOAc, the combined organic phases were washed with brine, dried over anhydrous  $\text{Na}_2\text{SO}_4$ , filtered and evaporated. The crude was purified by MPLC (EtOAc 1/heptane 7) yielding ketone **8** (7.47 g, 43.92 mmol, 81%) of as a colorless oil. This compound being not stable it has to be used rapidly.

$R_f = 0.28$  (EtOAc 1/ heptane 4). IR (neat)  $\nu$ : 896, 1066, 1246, 1377, 1709, 1770, 2873, 2931, 2958, 3432  $\text{cm}^{-1}$ .  $^1\text{H}$  NMR (500 MHz,  $\text{CDCl}_3$ ):  $\delta = 0.94$  (t,  $J = 7.0$  Hz, 3H), 1.34-1.55 (m, 4H), 1.77 (s, 3H), 2.55 (dd,  $J = 8.9$  and 17.7 Hz, 1H), 2.64 (dd,  $J = 2.7$  and 17.7 Hz, 1H), 3.13 (s, 2H), 4.00-4.10 (m, 1H), 4.84 (s, 1H), 4.97 (s, 1H).  $^{13}\text{C}$  NMR (75 MHz,  $\text{CDCl}_3$ ):  $\delta = 14.0, 18.7, 22.7, 38.6, 48.2, 53.0, 67.4, 115.4, 138.8, 210.1$ . LRMS (ESI):  $m/z = 193$  ( $\text{M} + \text{Na}^+$ ). HRMS (ESI) calcd for  $\text{C}_{10}\text{H}_{18}\text{O}_2\text{Na}$ : 193.1204. Found: 193.1204.

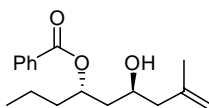

- (4S,6S)-6-hydroxy-8-methylnon-8-en-4-yl benzoate (**9**)

To a solution of alcohol **8** (1.43 g, 8.41 mmol) and benzaldehyde (3.56 g, 33.6 mmol) in THF (25 mL) at  $-10\text{ }^\circ\text{C}$  was slowly added an  $\text{SmI}_2$  solution (0.1 M/THF, 25 mL, 2.52 mmol). The mixture was allowed to reach room temperature over a period of 20 h and was then quenched by adding an  $\text{NaHCO}_3$  aqueous

(2) Shao, L.; Kawano, H.; Saburi, M.; Uchida, Y. *Tetrahedron* **1993**, 49, 1997.

(3) Custer, D. W.; Zabawa, T. P.; Scheidt, K. A. *J. Am. Chem. Soc.* **2008**, 130, 804.

saturated solution. After extraction by EtOAc, the combined organic phases were washed by brine, dried over anhydrous  $\text{MgSO}_4$ , filtered and evaporated. The crude was purified by MPLC (EtOAc 1/heptane 19) yielding **9** as a colorless oil (1.95 g, 7.06 mmol, 84%).

$R_f = 0.17$  (EtOAc 1/heptane 8). IR (neat)  $\nu$ : 1114, 1276, 1315, 1716, 2934, 2960, 3494  $\text{cm}^{-1}$ .  $^1\text{H}$  NMR (300 MHz,  $\text{CDCl}_3$ ):  $\delta$  0.94 (t,  $J = 7.3$  Hz, 3H), 1.32-1.54 (m, 2H), 1.58-1.90 (m, 4H), 1.70 (s, 3H), 2.13 (dd,  $J = 5.2$  and 13.8 Hz, 1H), 2.64 (dd,  $J = 8.0$  and 13.8 Hz, 1H), 2.96 (d,  $J = 3.2$  Hz, 1H), 3.75 (dddd,  $J = 2.5, 3.1, 5.2, 8.0$  and 10.0 Hz, 1H), 4.72-4.79 (m, 1H), 4.79-4.84 (m, 1H), 5.39 (dddd,  $J = 2.9, 4.7, 7.9$  and 10.2 Hz, 1H), 7.40-7.50 (m, 2H), 7.57 (tt,  $J = 1.4$  and 7.3 Hz, 1H), 8.02-8.10 (m, 2H).  $^{13}\text{C}$  NMR (75 MHz,  $\text{CDCl}_3$ ):  $\delta$  14.0, 18.9, 22.7, 37.4, 42.7, 45.9, 65.3, 72.4, 113.2, 128.5, 129.8, 130.3, 133.2, 142.8, 167.5. LRMS (ESI):  $m/z = 299$  ( $\text{M} + \text{Na}^+$ ). HRMS (ESI) calcd for  $\text{C}_{17}\text{H}_{24}\text{O}_3\text{Na}$ : 299.1623. Found: 299.1624.  $[\alpha]_D^{20} = +9.3$  ( $c$  0.92,  $\text{CHCl}_3$ ).

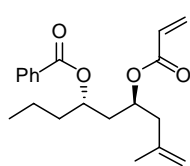

- (4*S*,6*S*)-6-(acryloyloxy)-8-methylnon-8-en-4-yl benzoate (**10**)

Acryloyl chloride (4.17 g, 46.4 mmol) was added dropwise to a solution of alcohol **9** (3.20 g, 11.6 mmol) and  $i\text{Pr}_2\text{NEt}$  (6.45 g, 50.0 mmol) in  $\text{CH}_2\text{Cl}_2$  (100 mL) at  $-10^\circ\text{C}$  under argon. The mixture was stirred for 40 min and then quenched by adding an aqueous  $\text{NaHCO}_3$  saturated solution. After extraction by  $\text{CH}_2\text{Cl}_2$  the combined organic phases were washed with brine, dried over anhydrous  $\text{MgSO}_4$ , filtered and evaporated. The crude was purified by MPLC (Eluent: EtOAc 1/heptane 15) to yield diene **10** as a colorless oil (3.70 g, 11.2 mmol, 97%).  $R_f = 0.39$  (EtOAc 1/heptane 8). IR (neat)  $\nu$ : 1110, 1191, 1272, 1720, 2961  $\text{cm}^{-1}$ .  $^1\text{H}$  NMR (300 MHz,  $\text{CDCl}_3$ ):  $\delta$  0.92 (t,  $J = 7.3$  Hz, 3H), 1.30-1.48 (m, 2H), 1.52-1.80 (m, 3H), 1.74 (s, 3H), 1.86-2.08 (m, 2H), 2.26 (dd,  $J = 6.7$  and 13.8 Hz, 1H), 2.41 (dd,  $J = 6.6$  and 13.8 Hz, 1H), 4.72-4.79 (m, 1H), 4.79-4.84 (m, 1H), 5.16-5.30 (m, 1H), 5.71 (dd,  $J = 1.6$  and 10.5 Hz, 1H), 5.99 (dd,  $J = 10.5$  and 17.3 Hz, 1H), 6.30 (dd,  $J = 1.6$  and 17.3 Hz, 1H), 7.41 (t,  $J = 7.2$  Hz, 2H), 7.53 (tt,  $J = 1.4$  and 7.3 Hz, 1H), 7.95-8.05 (m, 2H).  $^{13}\text{C}$  NMR (75 MHz,  $\text{CDCl}_3$ ):  $\delta$  14.1, 18.6, 22.6, 36.9, 38.0, 43.2, 69.2, 71.3, 113.9, 128.4, 128.7, 128.7, 130.5, 130.7, 132.9, 141.4, 165.6, 166.2. LRMS (ESI):  $m/z = 299$  ( $\text{M} + \text{Na}^+$ ). HRMS (ESI) calcd for  $\text{C}_{20}\text{H}_{26}\text{O}_4\text{Na}$ : 353.1729. Found: 353.1734.  $[\alpha]_D^{20} = +38.3$  ( $c$  1.0,  $\text{CHCl}_3$ ).

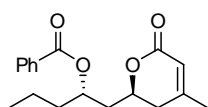

- (*S*)-1-((*S*)-4-methyl-6-oxo-3,6-dihydro-2H-pyran-2-yl)pentan-2-yl benzoate (**11**)

To a solution of olefin **10** (1.0 g, 3.03 mmol) in freshly distilled  $\text{CH}_2\text{Cl}_2$  (25 mL) under argon was added 2<sup>nd</sup> generation Grubbs's catalyst (103 mg, 0.0121 mmol, 4 mol%) dissolved in  $\text{CH}_2\text{Cl}_2$  (3 mL). The resulting mixture was refluxed for 48 h and then cooled. Silica gel was added and  $\text{CH}_2\text{Cl}_2$  was evaporated under vacuum and the crude was purified by column chromatography (EtOAc 1/ heptane 3), yielding lactone **11** (789 mg, 2.61 mmol, 86%) as a colorless oil.  $R_f = 0.20$  (EtOAc 1/ heptane 2).

$^1\text{H}$  NMR (300 MHz,  $\text{CDCl}_3$ ):  $\delta$  0.95 (t,  $J = 7.3$  Hz, 3H), 1.32-1.52 (m, 2H), 1.60-1.84 (m, 2H), 1.94 (s, 3H), 2.02 (ddd,  $J = 4.0, 8.4$  and 14.7 Hz, 1H), 2.11 (ddd,  $J = 3.9, 8.4$  and 14.7 Hz, 1H), 2.20 (dd,  $J = 4.1$  and 17.8 Hz, 1H), 2.37 (dd,  $J = 11.9$  and 17.8 Hz, 1H), 4.51 (tdd,  $J = 4.1, 8.4$  and 11.6 Hz, 1H), 5.39 (dddd,  $J = 4.0, 5.3, 7.2$  and 8.5, 1H), 5.78 (t,  $J = 1.5$  Hz, 1H), 7.40-7.49 (m, 2H), 7.56 (tt,  $J = 1.4$  and 7.3 Hz, 1H), 8.00-8.07 (m, 2H).  $^{13}\text{C}$  NMR (75 MHz,  $\text{CDCl}_3$ ):  $\delta$  14.0, 18.5, 23.0, 35.1, 37.1, 40.1, 71.5, 74.3, 116.7, 128.5, 139.6, 130.4, 133.0,

156.8, 164.7, 166.1. LRMS (ESI):  $m/z$  = 325 ( $M+Na^+$ ). HRMS (ESI) calcd for  $C_{18}H_{22}O_4Na$ : 325.1416. Found: 325.1420.  $[\alpha]_D^{20} = -10.1$  ( $c$  0.42,  $CHCl_3$ ).

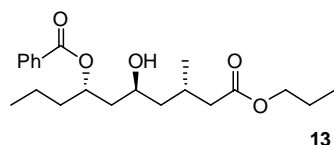

**13**

- (4*S*,6*S*,8*S*)-6-hydroxy-8-methyl-10-oxo-10-propoxydecan-4-yl benzoate (**13**) and (S)-1-((2*S*,4*S*)-4-methyl-6-oxotetrahydro-2H-pyran-2-yl)pentan-2-yl benzoate (**12**)

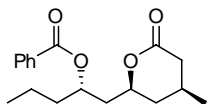

**12**

To a solution of lactone **11** (4.70 g, 15.56 mmol) in *n*PrOH (100 mL) was added Pd/C (940 mg) and  $H_2$  was bubbled through the solution during 5 min. The mixture was stirred at room temperature for 4 h and was filtered on celite. To the resulting solution was added PPTS (10 mg). After 16 h stirring at room temperature a  $NaHCO_3$  saturated aqueous solution and  $Et_2O$  were added. The phases were separated and the aqueous phase was extracted twice by  $Et_2O$ , the combined organic phases were dried over anhydrous  $MgSO_4$ , filtered and evaporated. The crude mixture was purified by MPLC ( $EtOAc$  1/ heptane 2) to yield ester **13** (3.364 g, 9.24 mmol, 59%) and the saturated lactone **12** (1.542 g, 5.07 mmol, 33%). Lactone **12** (1.542 g, 5.07 mmol) can be recycled into the desired ester **13** by stirring in *n*-PrOH (30 mL) with PPTS (10 mg) at room temperature for 16 h, yielding alcohol **13** (1.11 g, 3.05 mmol, 60%) and starting saturated lactone **12** (400 mg, 1.31 mmol, 26%).

Data for alcohol **13**:  $R_f$  = 0.31 ( $EtOAc$  1/ heptane 2). IR (neat)  $\nu$ : 1113, 1275, 1456, 1716, 2959, 3498  $cm^{-1}$ .  $^1H$  NMR (300 MHz,  $CD_3COCD_3$ ):  $\delta$  = 0.90 (t,  $J$  = 7.4 Hz, 3H), 0.90 (d,  $J$  = 6.4 Hz, 3H), 0.93 (t,  $J$  = 7.4 Hz, 3H), 1.27 (ddd,  $J$  = 3.4, 8.6, 13.8 Hz, 1 H), 1.34-1.55 (m, 3H), 1.60 (q,  $J$  = 7.3 Hz, 2H), 1.64-1.88 (m, 4H), 2.10 (dd,  $J$  = 7.7 and 13.8 Hz, 1H), 2.32 (dd,  $J$  = 5.3 and 13.8 Hz, 1H), 3.68 (d,  $J$  = 5.7 Hz, 1H), 3.68-3.83 (m, 1H), 3.97 (t,  $J$  = 6.7 Hz, 2H), 5.38 (dddd,  $J$  = 3.0, 5.3, 6.9 and 9.7, 1H), 5.78 (t,  $J$  = 1.5 Hz, 1H), 7.50 (t,  $J$  = 7.3 Hz, 2H), 7.63 (tt,  $J$  = 1.4 and 7.4 Hz, 1H), 8.00-8.08 (m, 2H).  $^{13}C$  NMR (75 MHz,  $CD_3COCD_3$ ):  $\delta$  = 10.8, 14.3, 19.3, 19.8, 22.8, 27.9, 38.0, 42.8, 44.1, 45.6, 65.8, 66.0, 73.0, 129.4, 130.2, 131.7, 133.8, 167.0, 173.1. LRMS (ESI):  $m/z$  = 387 ( $M+Na^+$ ). HRMS (ESI) calcd for  $C_{21}H_{32}O_5Na$ : 387.2147. Found: 387.2135.  $[\alpha]_D^{20} = -0.351$  ( $c$  1.29,  $CHCl_3$ ).

Data for lactone **12**:  $R_f$  = 0.21 ( $EtOAc$  1/ heptane 2). IR (neat)  $\nu$ : 2957, 2872, 1712, 1450, 1270, 1228, 710  $cm^{-1}$ .  $^1H$  NMR (300 MHz,  $CHCl_3$ ):  $\delta$  = 0.94 (t,  $J$  = 7.4 Hz, 3H), 1.00 (d,  $J$  = 6.1 Hz, 3H), 1.15-1.36 (m, 1H), 1.33-1.49 (m, 2H), 1.58-1.83 (m, 2H), 1.85-2.10 (m, 5H), 2.65 (dq,  $J$  = 1.9 and 11.9 Hz, 1H), 4.00 (dddd,  $J$  = 2.9, 5.1, 7.2 and 12.0 Hz, 1H), 5.41 (tt,  $J$  = 5.3 and 7.1 Hz, 1H), , 7.44 (t,  $J$  = 7.2 Hz, 2H), 7.58 (tt,  $J$  = 1.4 and 7.4 Hz, 1H), 8.00-8.08 (m, 2H).  $^{13}C$  NMR (75 MHz,  $CD_3COCD_3$ ):  $\delta$  = 14.0, 18.4, 21.7, 26.6, 37.0, 37.4, 37.9, 41.2, 71.4, 77.3, 128.4, 129.6, 130.4, 132.9, 166.0, 170.9. LRMS (ESI):  $m/z$  = 327 ( $M+Na^+$ ). HRMS (ESI) calcd for  $C_{18}H_{24}O_4Na$ : 329.1572. Found: 327.1576.  $[\alpha]_D^{20} = -0.351$  ( $c$  1.29,  $CHCl_3$ ).

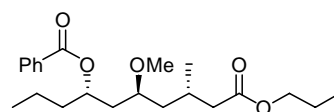

- (4*S*,6*S*,8*S*)-6-methoxy-8-methyl-10-oxo-10-propoxydecan-4-yl benzoate (**14**)

To a solution of alcohol **13** (4.07 g, 11.2 mmol) and proton sponge (24.0 g, 112 mmol) in  $CH_2Cl_2$  (150 mL) at room temperature, was added  $Me_3O.BF_4$  (8.28 g, 56 mmol). The resulting mixture was stirred for 3 h then transferred to a separating funnel and twice washed by an aqueous saturated solution of  $CuSO_4$  and then washed

three times by a saturated aqueous solution of citric acid. The organic phases were dried over anhydrous  $\text{MgSO}_4$ , filtered, evaporated and purified by MPLC (EtOAc 1/ heptane 7) to yield product **14** (3.942 g, 10.46 mmol, 93%) as a colorless oil.

$R_f = 0.19$  (EtOAc 1/ heptane 5). IR (neat): 1070, 1096, 1110, 1173, 1270, 1714, 2875, 2932, 2960  $\text{cm}^{-1}$ .  $^1\text{H}$  NMR (300 MHz,  $\text{CDCl}_3$ ):  $\delta = 0.92$  (t,  $J = 7.3$  Hz, 3H), 0.95 (t,  $J = 7.3$  Hz, 3H), 0.96 (d,  $J = 5.7$  Hz, 3H), 1.23-1.49 (m, 3H), 1.54-1.76 (m, 5H), 1.76-1.85 (m, 2H), 2.02-2.18 (m, 2H), 2.21-2.35 (m, 1H), 3.26-3.38 (m, 1H), 3.30 (s, 3H), 4.00 (t,  $J = 6.7$  Hz, 2H), 5.35 (tt,  $J = 5.0$  and 7.5, 1H), 7.44 (t,  $J = 7.4$  Hz, 2H), 7.55 (tt,  $J = 1.3$  and 7.4 Hz, 1H), 8.00-8.08 (m, 2H).  $^{13}\text{C}$  NMR (75 MHz,  $\text{CDCl}_3$ ):  $\delta = 10.5, 14.1, 18.6, 20.2, 22.1, 27.4, 37.4, 39.9, 41.6, 42.1, 57.0, 65.9, 72.3, 76.1, 128.5, 129.7, 130.8, 132.9, 166.3, 173.0$ . LRMS (ESI):  $m/z = 401$  ( $\text{M} + \text{Na}^+$ ). HRMS (ESI) calcd for  $\text{C}_{22}\text{H}_{34}\text{O}_5\text{Na}$ : 401.2304. Found: 401.2315.  $[\alpha]_D^{20} = +9.04$  ( $c$  0.89,  $\text{CHCl}_3$ ).

- (3*S*,5*S*,7*S*)-7-hydroxy-5-methoxy-3-methyldecanal (**15**)

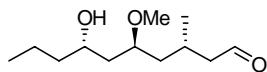

To a solution of ester **14** (800 mg, 2.12 mmol) in toluene (10 mL) at  $-78^\circ\text{C}$  under argon was slowly added (1.5 mL/h) a DIBALH solution (1.5 M/toluene, 4.24 mL, 6.36 mmol). The resulting solution was stirred for further 2 h and then quenched by addition of MeOH (1 mL) and warmed to room temperature. EtOAc and a saturated aqueous solution of potassium and sodium tartrate (Rochelle salt) were added and the mixture was stirred for 30 min. The phases were separated and the aqueous phase was extracted twice by EtOAc. Combined organic phases were dried over anhydrous  $\text{MgSO}_4$ , filtered and evaporated. The crude mixture was purified by MPLC (EtOAc 1/ heptane 2) yielding aldehyde **15** (440 mg, 2.0 mmol, 94%) as a colorless oil.

$R_f = 0.16$  (EtOAc 1/heptane 2). IR (neat): 1087, 1125, 1379, 1461, 1721, 2873, 2931, 2955, 3436  $\text{cm}^{-1}$ .  $^1\text{H}$  NMR (500 MHz,  $\text{CDCl}_3$ ):  $\delta = 0.93$  (t,  $J = 7.0$  Hz, 3H), 1.00 (d,  $J = 6.4$  Hz, 3H), 1.23-1.41 (m, 3H), 1.41-1.57 (m, 3H), 1.67-1.79 (m, 2H), 2.20-2.37 (m, 2H), 2.40-2.51 (m, 1H), 3.38 (s, 3H), 3.57 (dddd,  $J = 3.8, 4.4, 5.9$  and 8.5 Hz, 1H), 5.35 (dddd,  $J = 2.3, 4.5, 7.1$  and 9.6 Hz, 1H), 9.76 (t,  $J = 2.1$  Hz, 1H).  $^{13}\text{C}$  NMR (75 MHz,  $\text{CDCl}_3$ ):  $\delta = 14.2, 18.9, 20.4, 25.3, 39.7, 40.2, 41.1, 51.4, 56.8, 68.5, 77.6, 202.6$ . LRMS (ESI):  $m/z = 239$  ( $\text{M} + \text{Na}^+$ ). HRMS (ESI) calcd for  $\text{C}_{12}\text{H}_{24}\text{O}_3\text{Na}$ : 239.1623. Found: 239.1621.  $[\alpha]_D^{20} = +1.66$  ( $c$  1.11,  $\text{CHCl}_3$ ).

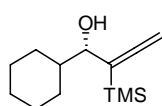

- (*S*)-1-cyclohexyl-2-(trimethylsilyl)buta-2,3-dien-1-ol (**16**)

To a solution of 1-trimethylsilylpropyne (3.0 g, 26.78 mmol) in THF (35 mL) at  $0^\circ\text{C}$  was added dropwise a solution of *t*-BuLi (1.5 N/hexane, 17.85 mL, 26.78 mmol), and the mixture was stirred for 1 h. Then, (+)-*B*-methoxy-diisopinocampheylborane (8.074 g, 25.55 mmol) in  $\text{Et}_2\text{O}$  (30 mL) was added and the reaction mixture was stirred for 10 min before adding  $\text{BF}_3 \cdot \text{OEt}_2$  (4.087 g, 26.78 mmol). The resulting reaction mixture was cooled to  $-100^\circ\text{C}$  and a solution of cyclohexanecarboxaldehyde (2.86 g, 25.55 mmol) in  $\text{Et}_2\text{O}$  (30 mL) was added dropwise over 90 min. The mixture was stirred for further 3 h and then slowly allowed to warm to room

(4) Prepared according to the method of Brown: Brown, H. C.; Khire, U. R.; Narla G. *J. Org. Chem.* **1995**, *60*, 8130.

temperature (over 1 h). The reaction was quenched by an addition of NaOH (3 N / H<sub>2</sub>O, 14.8 mL, 44.4 mmol) and H<sub>2</sub>O<sub>2</sub> (30% / H<sub>2</sub>O, 9.9 mL, 87.3 mmol), the mixture was refluxed for 1 h and was then cooled to room temperature. After extraction, the organic phase was washed by H<sub>2</sub>O, brine, dried over anhydrous MgSO<sub>4</sub>, filtered and concentrated under vacuum. The resulting crude was purified by MPLC (EtOAc 1/ heptane 15) affording allene **16** as a colorless oil (3.14 g, 14.0 mmol, 55%) which spectroscopical data are identical to those reported in the literature.  $[\alpha]_D^{20} = +23.4$  (*c* 0.96, CHCl<sub>3</sub>) *lit.*<sup>4</sup>  $[\alpha]_D^{20} = -20.4$  (*c* 1.76, CHCl<sub>3</sub>) for the enantiomer with *ee* = 96%).

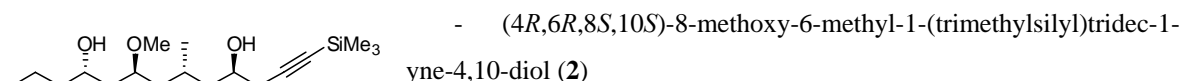

To a solution of aldehyde **15** (300 mg, 1.39 mmol) and allene **16** (933 mg, 4.16 mmol) in CH<sub>2</sub>Cl<sub>2</sub> (40 mL) was added InBr<sub>3</sub> (5 mg, 13.9 μmol) at 20 °C. The resulting mixture was stirred at room temperature for 20 h and then the solvent was evaporated before purification by MPLC (EtOAc 2/ heptane 3) yielding alkyne **2** as a colorless oil (352 mg, 1.07 mmol, 77%).

*R*<sub>f</sub> = 0.18 (EtOAc 1/ heptane 2). IR (neat)  $\nu$ : 843, 1089, 1249, 2361, 2931, 3376 cm<sup>-1</sup>. <sup>1</sup>H NMR (500 MHz, CDCl<sub>3</sub>):  $\delta$  = 0.16 (s, 9H), 0.92 (t, *J* = 7.0 Hz, 3H), 0.96 (d, *J* = 6.7 Hz, 3H), 1.21-1.31 (m, 3H), 1.31-1.59 (m, 7H), 1.65-1.77 (m, 2H), 1.77-1.89 (m, 1H), 2.35 (dd, *J* = 6.7 and 16.8 Hz, 1H), 2.43 (dd, *J* = 5.2 and 16.8 Hz, 1H), 3.37 (s, 3H), 3.57 (dddd, *J* = 3.3, 5.4, 6.1 and 7.4 Hz, 1H), 3.79-3.86 (m, 1H), 3.86-3.93 (m, 1H). <sup>13</sup>C NMR (75 MHz, CDCl<sub>3</sub>):  $\delta$  = 0.2, 14.3, 19.0, 20.1, 26.5, 29.8, 39.7, 40.2, 41.6, 43.8, 56.9, 67.9, 68.7, 77.8, 87.8, 103.4. LRMS (ESI): *m/z* = 351 (M+Na<sup>+</sup>). HRMS (ESI) calcd for C<sub>18</sub>H<sub>36</sub>O<sub>3</sub>NaSi: 351.2331. Found: 351.2340.  $[\alpha]_D^{20} = +17.46$  (*c* 0.29, CHCl<sub>3</sub>).

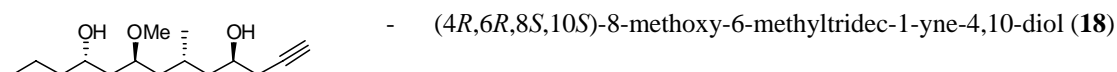

To a solution of alkyne **2** (344 mg, 1.05 mmol) in MeOH (5 mL) was added K<sub>2</sub>CO<sub>3</sub> (723 mg, 5.24 mmol) and the resulting mixture was stirred at room temperature for 2 h. After addition of water and extraction by EtOAc, the combined organic phases were dried over anhydrous MgSO<sub>4</sub>, filtered and evaporated. The crude was purified by MPLC (EtOAc 1/ heptane 1) yielding alkyne **18** as a colorless oil (252 mg, 0.98 mmol, 94%).

*R*<sub>f</sub> = 0.22 (EtOAc 1/ heptane 1). IR (neat)  $\nu$ : 1026, 1086, 1135, 1378, 1461, 2872, 2928, 2954, 3310 cm<sup>-1</sup>. <sup>1</sup>H NMR (300 MHz, CDCl<sub>3</sub>):  $\delta$  = 0.93 (t, *J* = 7.7 Hz, 3H), 0.96 (d, *J* = 6.6 Hz, 3H), 1.15-1.90 (m, 12H), 2.06 (t, *J* = 2.6 Hz, 1H), 2.32 (ddd, *J* = 2.6, 6.3 and 16.6 Hz, 1H), 2.41 (dd, *J* = 2.6, 5.3 and 16.6 Hz, 1H), 2.59 (s, 1H), 3.37 (s, 3H), 3.52-3.63 (m, 1H), 3.79-3.96 (m, 2H). <sup>13</sup>C NMR (75 MHz, CDCl<sub>3</sub>):  $\delta$  = 14.3, 18.9, 20.1, 26.4, 28.3, 39.7, 40.2, 41.6, 43.7, 56.9, 67.8, 68.7, 70.9, 77.7, 81.1. LRMS (ESI): *m/z* = 279 (M+Na<sup>+</sup>). HRMS (ESI) calcd for C<sub>15</sub>H<sub>28</sub>O<sub>3</sub>Na: 279.1936. Found: 279.1942.  $[\alpha]_D^{20} = +28.54$  (*c* 0.55, CHCl<sub>3</sub>).

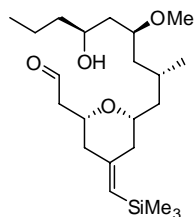

- 2-((2*R*,6*R*,*E*)-6-((2*S*,4*S*,6*S*)-6-hydroxy-4-methoxy-2-methylnonyl)-4-((trimethylsilyl)methylene)tetrahydro-2*H*-pyran-2-yl)acetaldehyde (**17**)

To a solution of 3-butenol (500 mg, 6.94 mmol) in CH<sub>2</sub>Cl<sub>2</sub> (3.5 mL) and pentane (30 mL) was added PhI(OAc)<sub>2</sub> (2.46 g, 7.63 mmol) and TEMPO (108 mg, 0.694 mmol). The resulting mixture was stirred at room temperature for 16 h. After cooling down to 0 °C, a saturated NaHCO<sub>3</sub> aqueous solution was added until gas evolution has ceased. Organic phase was separated and dried over anhydrous MgSO<sub>4</sub> and then 3-butenal was distilled out using a Vigreux column leading to a 3-butenal CH<sub>2</sub>Cl<sub>2</sub>/pentane solution (conc. estimated by <sup>1</sup>H NMR).

To an acetone solution (1 mL) of alkyne **2** (20 mg, 61.0 μmol) and 3-butenal (500 μL of the above CH<sub>2</sub>Cl<sub>2</sub>/pentane solution, large excess) was added CpRu[(MeCN)<sub>3</sub>].PF<sub>6</sub> (5.3 mg, 12.2 μmol, 20 mol%) and AcOH (0.37 mg, 6.1 μmol, 100 μL of 3.7 mg/mL solution in acetone). The resulting mixture was stirred at room temperature for 60 h and then concentrated under vacuum. The crude was filtered through a pad of silica and purified on preparative HPLC (EtOAc 2/ heptane 3) yielding aldehyde **17** (14 mg, 35 μmol, 58%) as colorless oil. *R*<sub>f</sub> = 0.34 (EtOAc 1/ heptane 1). IR (neat)  $\nu$ : 1085, 1247, 1325, 1368, 1622, 1726, 2953, 3447 cm<sup>-1</sup>. <sup>1</sup>H NMR (300 MHz, CDCl<sub>3</sub>):  $\delta$  = 0.10 (s, 9H), 0.89-0.97 (m, 6H), 1.13-1.31 (m, 2H), 1.32-1.43 (m, 2H), 1.43-1.55 (m, 2H), 1.55-1.81 (m, 4H), 1.88 (t, *J* = 12.2 Hz, 1H), 2.05-2.24 (m, 2H), 2.38 (dt, *J* = 1.7 and 11.6 Hz, 1H), 2.47 (ddd, *J* = 1.8, 4.3 and 16.1 Hz, 1H), 2.61 (ddd, *J* = 2.7, 8.3 and 16.1 Hz, 1H), 3.00 (br s, 1H), 3.28-3.41 (m, 1H), 3.36 (s, 3H), 3.56 (dtd, *J* = 3.6, 5.8 and 7.3 Hz, 1H), 3.79-3.94 (m, 2H), 5.26 (s, 1H), 9.79 (dd, *J* = 2.0 and 2.6 Hz, 1H). <sup>13</sup>C NMR (125 MHz, CDCl<sub>3</sub>):  $\delta$  = 0.4, 14.3, 19.0, 20.2, 26.3, 39.5, 40.2, 40.7, 41.4, 43.8, 45.3, 49.8, 56.9, 68.7, 73.9, 76.4, 77.9, 124.0, 152.7, 201.3. LRMS (ESI): *m/z* = 397 (M-H<sup>+</sup>). HRMS (ESI) calcd for C<sub>22</sub>H<sub>41</sub>O<sub>4</sub>Si: 397.2774. Found: 397.2783. [ $\alpha$ ]<sub>D</sub><sup>20</sup> = +13.3 (c 0.5, CHCl<sub>3</sub>).

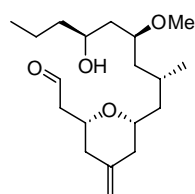

- 2-((2*R*,6*R*)-6-((2*S*,4*S*,6*S*)-6-hydroxy-4-methoxy-2-methylnonyl)-4-methylenetetrahydro-2*H*-pyran-2-yl)acetaldehyde (**19**)

To a solution of alkyne **18** (25 mg, 97 μmol) and olefin (19.2 mg, 0.146 mmol) in acetone (200 μL, freshly distilled from BaO) was added Cp\*Ru[(MeCN)<sub>3</sub>].PF<sub>6</sub> (4.9 mg, 9.7 μmol, 10 mol%) and AcOH (0.47 mg, 100 μL of 4.7 mg/mL solution in acetone). The resulting mixture was stirred at room temperature for 6 h before adding a MeCN solution of LiBF<sub>4</sub> (1M, 1 mL) and H<sub>2</sub>O (20 μL). After 90 min, silica was added and the solvents were evaporated before purification by MPLC (EtOAc 1/ heptane 3) yielding aldehyde **19** (17 mg, 52 μmol, 54%) as a colorless oil.

*R*<sub>f</sub> = 0.38 (EtOAc 1/ heptane 1). IR (neat)  $\nu$ : 1085, 1247, 1325, 1376, 1461, 1725, 2930, 3429 cm<sup>-1</sup>. <sup>1</sup>H NMR (500 MHz, CDCl<sub>3</sub>):  $\delta$  = 0.91 (d, *J* = 6.7 Hz, 3H), 0.93 (t, *J* = 7.0 Hz, 3H), 1.12-1.28 (m, 3H), 1.30-1.40 (m, 2H), 1.42-1.55 (m, 3H), 1.59 (ddd, *J* = 4.3, 9.0 and 15.9 Hz, 1H), 1.62-1.74 (m, 2H), 1.74-1.84 (m, 1H), 1.93 (t, *J* = 12.2 Hz, 1H), 2.01 (t, *J* = 12.2 Hz, 1H), 2.17 (d, *J* = 13.4 Hz, 1H), 2.25 (d, *J* = 13.1 Hz, 1H), 2.45-2.53 (m, 1H), 2.63 (ddd, *J* = 2.6, 8.4 and 16.1 Hz, 1H), 3.36 (s, 3H), 3.36-3.42 (m, 1H), 3.51-3.59 (m, 1H), 3.76-3.84 (m, 1H),



3.84-3.92 (m, 1H), 4.76 (s, 2H), 9.79 (t,  $J = 2.4$  Hz, 1H).  $^{13}\text{C}$  NMR (125 MHz,  $\text{CDCl}_3$ ):  $\delta = 14.3, 19.0, 20.2, 26.2, 39.6, 40.2, 40.6, 41.2, 41.4, 43.6, 49.8, 58.8, 68.7, 73.7, 76.6, 77.9, 109.4, 143.9, 201.2$ . LRMS (ESI):  $m/z = 349$  ( $\text{M} + \text{Na}^+$ ). HRMS (ESI) calcd for  $\text{C}_{19}\text{H}_{34}\text{O}_4\text{Na}$ : 349.2355. Found: 349.2342.  $[\alpha]_{\text{D}}^{20} = +35.37$  ( $c$  0.15,  $\text{CHCl}_3$ ).

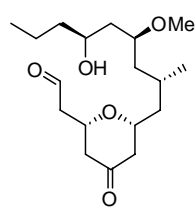

- 2-((2*S*,6*R*)-6-((2*S*,4*S*,6*S*)-6-hydroxy-4-methoxy-2-methylnonyl)-4-oxotetrahydro-2*H*-pyran-2-yl)acetaldehyde (**20**)

*From olefin 17*: To a solution of olefin **17** (11 mg, 0.0277 mmol) and pyridine (6.5 mg, 81.8  $\mu\text{mol}$ ), in *t*-BuOH (300  $\mu\text{L}$ ) was added aqueous solutions of  $\text{NaIO}_4$  (0.5 M/ $\text{H}_2\text{O}$ , 163  $\mu\text{L}$ , 81.8  $\mu\text{mol}$ ) and  $\text{OsO}_4$  (0.02 M/ $\text{H}_2\text{O}$ , 82  $\mu\text{L}$ , 1.635  $\mu\text{mol}$ ). The resulting mixture was stirred at room temperature for 16 h. More  $\text{NaIO}_4$  was added (0.5 M solution in water, 163  $\mu\text{L}$ , 81.8  $\mu\text{mol}$ ) and the mixture was stirred for further 4 h. After addition of brine and extraction by EtOAc, the combined organic phases were dried over anhydrous  $\text{MgSO}_4$ , filtered and evaporated. The crude was purified by MPLC (EtOAc 100%) yielding ketone **20** as colorless oil (9.0 mg, 0.0274 mmol, 100%).

*From olefin 19*: To a solution of olefin **19** (9 mg, 0.0276 mmol) and pyridine (6.5 mg, 81.8  $\mu\text{mol}$ ) in *t*-BuOH (300  $\mu\text{L}$ ), was added an aqueous solutions of  $\text{NaIO}_4$  (0.5 M/ $\text{H}_2\text{O}$ , 163  $\mu\text{L}$ , 81.8  $\mu\text{mol}$ ) and  $\text{OsO}_4$  (0.02 M/ $\text{H}_2\text{O}$ , 82  $\mu\text{L}$ , 1.635  $\mu\text{mol}$ ). The reaction mixture was stirred at room temperature for 16 h. Additional  $\text{NaIO}_4$  was added (0.5 M/ $\text{H}_2\text{O}$ , 163  $\mu\text{L}$ , 81.8  $\mu\text{mol}$ ) and the mixture was stirred for further 4 h. Brine was then added and the mixture was extracted twice by EtOAc. Combined organic phases were dried over anhydrous  $\text{MgSO}_4$ , filtered and evaporated. The crude was purified by MPLC (EtOAc 100%) yielding ketone **20** as colorless oil (8.5 mg, 0.026 mmol, 96%).

$R_f = 0.35$  (EtOAc). IR (neat)  $\nu$ : 1024, 1086, 1249, 1328, 1375, 1457, 1719, 2871, 2928, 2954, 3448  $\text{cm}^{-1}$ .  $^1\text{H}$  NMR (500 MHz,  $\text{CDCl}_3$ ):  $\delta = 0.90$ -0.98 (m, 6H), 1.20-1.30 (m, 3H), 1.30-1.40 (m, 2H), 1.42-1.55 (m, 3H), 1.62-1.76 (m, 2H), 1.78-1.90 (m, 1H), 2.25 (dd,  $J = 11.7$  and 24.6 Hz, 1H), 2.28 (dd,  $J = 11.7$  and 24.6 Hz, 1H), 2.37 (d,  $J = 14.5$  Hz, 1H), 2.44 (d,  $J = 14.5$  Hz, 1H), 2.58 (dd,  $J = 3.8$  and 16.4 Hz, 1H), 2.78 (ddd,  $J = 2.2, 8.2$  and 26.4 Hz, 1H), 2.88 (br s, 1H), 3.37 (s, 3H), 3.52-3.63 (m, 1H), 3.68-3.78 (m, 1H), 3.85-3.92 (m, 1H), 4.11-4.19 (m, 1H), 9.80 (s, 1H).  $^{13}\text{C}$  NMR (125 MHz,  $\text{CDCl}_3$ ):  $\delta = 14.3, 19.0, 20.0, 26.3, 39.6, 40.2, 41.4, 43.9, 47.3, 48.3, 49.6, 57.0, 68.7, 72.0, 75.2, 77.8, 199.5, 205.9$ . LRMS (ESI):  $m/z = 351$  ( $\text{M} + \text{Na}^+$ ). HRMS (ESI) calcd for  $\text{C}_{18}\text{H}_{32}\text{O}_5\text{Na}$ : 351.2147. Found: 351.2155.  $[\alpha]_{\text{D}}^{20} = +17.9$  ( $c$  0.65,  $\text{CHCl}_3$ ).

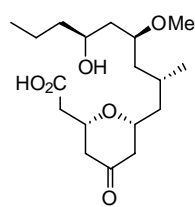

- 2-((2*R*,6*R*)-6-((2*S*,4*S*,6*S*)-6-hydroxy-4-methoxy-2-methylnonyl)-4-oxotetrahydro-2*H*-pyran-2-yl)acetic acid (**21**)

To a solution of aldehyde **20** (12 mg, 0.0366 mmol) in *t*-BuOH (1 mL) was added 2-methyl-2-butene (2 M solution in THF, 1.03 mL, 2.06 mmol),  $\text{NaClO}_2$  (19.8 mg, 0.220 mmol),  $\text{KH}_2\text{PO}_4$  (14.9 mg, 0.110 mmol) and  $\text{H}_2\text{O}$  (0.5 mL). The resulting mixture was stirred at room temperature for 15 min. EtOAc was then added and the mixture was transferred to a separating funnel. The organic phase was washed by  $\text{H}_2\text{O}$ , dried over anhydrous  $\text{MgSO}_4$ , filtered and evaporated. The crude was purified by MPLC (EtOAc 100%) yielding acid **21** as colorless oil (11 mg, 0.032 mmol, 87%).

$R_f = 0.14$  (EtOAc). IR (neat)  $\nu$ : 1079, 1124, 1253, 1714, 2872, 2955, 3404  $\text{cm}^{-1}$ .  $^1\text{H}$  NMR (500 MHz,  $\text{CDCl}_3$ ):  $\delta$  = 0.90-0.98 (m, 6H), 1.11-1.19 (m, 1H), 1.22-1.55 (m, 7H), 1.64 (ddd,  $J$  = 6.6, 8.7 and 14.4 Hz, 1H), 1.74-1.87 (m, 2H), 1.95 (ddd,  $J$  = 4.8, 8.5 and 14.3 Hz, 1H), 2.20-2.30 (m, 2H), 2.34 (d,  $J$  = 14.2 Hz, 1H), 2.45 (d,  $J$  = 14.2 Hz, 1H), 2.50-2.64 (m, 2H), 3.37 (s, 3H), 3.52-3.60 (m, 1H), 3.70 (t,  $J$  = 11.0 Hz, 1H), 3.97-4.04 (m, 1H), 4.04-4.11 (m, 1H), 5.66 (br s, 1H).  $^{13}\text{C}$  NMR (125 MHz,  $\text{CDCl}_3$ ):  $\delta$  = 14.3, 18.8, 20.7, 28.0, 38.8, 40.1, 40.7, 41.4, 44.2, 47.1, 48.5, 56.9, 69.0, 73.7, 76.8, 78.2, 173.1, 206.3. LRMS (ESI):  $m/z$  = 367 ( $\text{M} + \text{Na}^+$ ). HRMS (ESI) calcd for  $\text{C}_{18}\text{H}_{32}\text{O}_6\text{Na}$ : 367.2097. Found: 367.2098.  $[\alpha]_D^{20} = +10.9$  ( $c$  1.3,  $\text{CHCl}_3$ , *lit.*  $[\alpha]_D^{25} = +6.09$  ( $c$  0.61)).

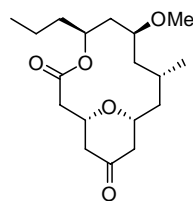

- (1R,5S,7S,9S,11R)-7-methoxy-9-methyl-5-propyl-4,15-dioxabicyclo[9.3.1]pentadecane-3,13-dione (**22**)

To a solution of acid **21** (26 mg, 0.0756 mmol) and  $\text{Et}_3\text{N}$  (105  $\mu\text{L}$ , 755  $\mu\text{mol}$ ) in THF (3 mL) was added 2,4,6-trichlorobenzoyl chloride (24 mg, 98.3  $\mu\text{mol}$ ). The resulting mixture was stirred at room temperature for 1 h and was then diluted in toluene (9 mL). The resulting solution was added dropwise (2 mL/h) to a diluted (0.017 M) solution of DMAP (190 mg, 1.56 mmol) in toluene (90 mL) at 80  $^\circ\text{C}$ . Once the addition was complete, the mixture was stirred for further 16 h at 80  $^\circ\text{C}$  before being filtrated on a pad of silica and concentrated under vacuum. The resulting crude was purified by MPLC (EtOAc 1/ heptane 3) yielding lactone **22** as a colorless oil (21 mg, 0.0644 mmol, 85%) the data of which correspond to those reported in the literature.<sup>3</sup>

$R_f = 0.24$  (EtOAc 1/ heptane 3). IR (neat)  $\nu$ : 1090, 1246, 1273, 1724, 2871, 2925, 2956  $\text{cm}^{-1}$ .  $^1\text{H}$  NMR (500 MHz,  $\text{CDCl}_3$ ):  $\delta$  = 0.92 (t,  $J$  = 7.3 Hz, 3H), 1.00 (t,  $J$  = 7.0 Hz, 3H), 1.20 (ddd,  $J$  = 2.4, 10.3 and 13.3 Hz, 1H), 1.32-1.41 (m, 3H), 1.42 (dd,  $J$  = 9.2 and 15.0 Hz, 1H), 1.45-1.56 (m, 2H), 1.56-1.74 (m, 4H), 2.24 (dd,  $J$  = 11.6 and 14.6 Hz, 1H), 2.28-2.36 (m, 2H), 2.43 (d,  $J$  = 14.6 Hz, 1H), 2.51 (dd,  $J$  = 10.7 and 14.6 Hz, 1H), 2.71 (dd,  $J$  = 4.0 and 14.6 Hz, 1H), 3.33 (s, 3H), 3.50 (dt,  $J$  = 3.1 and 9.8 Hz, 1H), 3.58 (t,  $J$  = 9.8 Hz, 1H), 4.04 (tt,  $J$  = 3.1 and 10.4 Hz, 1H), 5.17-5.26 (m, 1H).  $^{13}\text{C}$  NMR (125 MHz,  $\text{CDCl}_3$ ):  $\delta$  = 14.1, 19.1, 25.6, 31.2, 37.2, 40.2, 42.1, 42.7, 44.5, 47.2, 49.0, 56.5, 73.5, 73.6, 75.9, 79.9, 170.1, 206.0. LRMS (ESI):  $m/z$  = 349 ( $\text{M} + \text{Na}^+$ ). HRMS (ESI) calcd for  $\text{C}_{18}\text{H}_{30}\text{O}_5\text{Na}$ : 349.1991. Found: 349.1994.  $[\alpha]_D^{20} = +18.0$  ( $c$  0.4,  $\text{CHCl}_3$ ), *lit.*<sup>3</sup>  $[\alpha]_D^{25} = +16.0$  ( $c$  0.16,  $\text{CHCl}_3$ ).

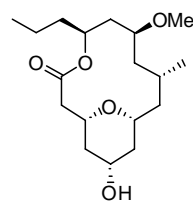

- (1R,5S,7S,9S,11R,13S)-13-hydroxy-7-methoxy-9-methyl-5-propyl-4,15-dioxabicyclo[9.3.1]pentadecan-3-one (**23**)

To a solution of ketone **22** (10 mg, 30.67  $\mu\text{mol}$ ) in EtOH (0.5 mL) at -10  $^\circ\text{C}$  was added  $\text{NaBH}_4$  (2.3 mg, 61.35  $\mu\text{mol}$ ). The resulting mixture was stirred for 20 min. AcOH was then added (15  $\mu\text{L}$ , 0.25 mmol) and the mixture was concentrated under vacuum. The resulting crude was by MPLC (EtOAc 1/ heptane 1) yielding alcohol **23** as colorless oil (9.2 mg, 28.05  $\mu\text{mol}$ , 91%) the data of which corresponding to those reported in the literature,<sup>3,5</sup> and **5-*epi*-23** (0.8 mg, 2.44  $\mu\text{mol}$ , 8%).

*Data for 23*:  $R_f = 0.20$  (EtOAc 1/ heptane 1). IR (neat)  $\nu$ : 991, 1089, 1137, 1273, 1371, 1456, 1729, 2870, 2920, 2421  $\text{cm}^{-1}$ .  $^1\text{H}$  NMR (500 MHz,  $\text{CDCl}_3$ ):  $\delta$  = 0.91 (t,  $J$  = 7.3 Hz, 3H), 0.99 (t,  $J$  = 6.9 Hz, 3H), 1.10-1.23 (m, 3H),

1.23-1.31 (m, 1H), 1.30-1.40 (m, 3H), 1.40-1.52 (m, 3H), 1.55-1.65 (m, 2H), 1.65-1.75 (m, 1H), 1.80-1.90 (m, 2H), 1.94-2.10 (m, 1H), 2.42 (dd,  $J$  = 10.7 and 14.5 Hz, 1H), 2.62 (dd,  $J$  = 4.1 and 14.5 Hz, 1H), 3.17 (t,  $J$  = 10.4 Hz, 1H), 3.31 (s, 3H), 3.58 (t,  $J$  = 9.8 Hz, 1H), 3.69-3.78 (m, 1H), 3.76-3.85 (m, 1H), 5.15 (ddd,  $J$  = 4.7, 8.8 and 10.3 Hz, 1H).  $^{13}\text{C}$  NMR (125 MHz,  $\text{CDCl}_3$ ):  $\delta$  = 14.0, 19.1, 25.7, 31.4, 37.1, 40.2, 40.9, 42.1, 42.4, 44.2, 56.4, 68.2, 72.5, 73.4, 75.7, 78.8, 171.0. LRMS (ESI):  $m/z$  = 351 ( $\text{M}+\text{Na}^+$ ). HRMS (ESI) calcd for  $\text{C}_{18}\text{H}_{32}\text{O}_5\text{Na}$ : 351.2147. Found: 351.2144.  $[\alpha]_{\text{D}}^{25}$  = +22.4 ( $c$  0.1,  $\text{CHCl}_3$ ) *lit.*<sup>5</sup>  $[\alpha]_{\text{D}}^{29}$  = +22.2 ( $c$  1,  $\text{CHCl}_3$ ).

*Data for 5-epi 23:*  $R_f$  = 0.24 (EtOAc 1/ heptane 1). IR (neat)  $\nu$ : 985, 1030, 1079, 1276, 1730, 2918, 3450  $\text{cm}^{-1}$ .  $^1\text{H}$  NMR (300 MHz,  $\text{CDCl}_3$ ):  $\delta$  = 0.84 (t,  $J$  = 7.3 Hz, 3H), 0.91 (t,  $J$  = 6.4 Hz, 3H), 1.02-1.17 (m, 2H), 1.23-1.36 (m, 5H), 1.36-1.50 (m, 5H), 1.50-1.60 (m, 3H), 1.79 (dd,  $J$  = 10.8 and 14.9 Hz, 1H), 2.28 (dd,  $J$  = 10.9 and 14.6 Hz, 1H), 2.52 (dd,  $J$  = 4.4 and 14.6 Hz, 1H), 3.24 (s, 3H), 3.53 (ddd,  $J$  = 2.2, 8.7 and 11.3 Hz, 1H), 3.61 (dd,  $J$  = 4.1 and 9.5 Hz, 1H), 4.12 (ddt,  $J$  = 2.3, 4.1 and 11.3 Hz, 1H), 4.18 (t,  $J$  = 2.7 Hz, 1H), 5.07-5.18 (m, 1H).  $^{13}\text{C}$  NMR (125 MHz,  $\text{CDCl}_3$ ):  $\delta$  = 14.1, 19.1, 25.8, 29.9, 31.6, 37.2, 38.5, 39.6, 40.3, 42.5, 42.6, 44.4, 56.4, 65.2, 69.3, 73.0, 75.0, 75.8, 171.2. LRMS (ESI):  $m/z$  = 351 ( $\text{M}+\text{Na}^+$ ). HRMS (ESI) calcd for  $\text{C}_{18}\text{H}_{32}\text{O}_5\text{Na}$ : 351.2147. Found: 351.2147.  $[\alpha]_{\text{D}}^{25}$  = +24.5 ( $c$  0.1,  $\text{CHCl}_3$ ).

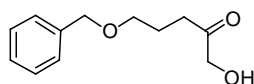

- 5-(benzyloxy)-1-hydroxypentan-2-one (**24**)

To a solution of 1-benzyloxy-4-pentene<sup>6</sup> (1 g, 4.81 mmol) in acetone (38 mL),  $\text{H}_2\text{O}$  (8.7 mL) and AcOH (1.8 mL) was added dropwise a solution of  $\text{KMnO}_4$  (1.24 g, 7.25 mmol) in acetone (15 mL) and  $\text{H}_2\text{O}$  (4.8 mL). The resulting mixture was stirred at room temperature until total disappearance of the starting material by TLC (*ca* 2 h 30 min). EtOH was added (2 mL) and the mixture was filtered on celite and concentrated under vacuum. The aqueous phase was extracted by EtOAc three times. Combined organic phases were dried over  $\text{Na}_2\text{SO}_4$ , filtered and evaporated under vacuum. The resulting crude was purified by MPLC ( $\text{Et}_2\text{O}$  100%) yielding hydroxyketone **24** as a colorless oil (527 mg, 2.205 mmol, 46%) the data of which corresponding to those reported in the literature.<sup>7</sup>

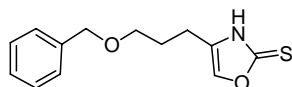

- 4-(3-(benzyloxy)propyl)oxazole-2(3H)-thione (**3**)

To a solution of ketone **24** (208 mg, 1 mmol) in EtOH (2 mL) was added KSCN (146 mg, 1.5 mmol) and a concentrated aqueous HCl solution (11.2 M, 123  $\mu\text{L}$ , 1.4 mmol). The resulting mixture was refluxed for 16 h and then cooled. EtOAc and  $\text{H}_2\text{O}$  were added and the phases were separated. The organic phase was washed by brine, dried over anhydrous  $\text{MgSO}_4$ , filtered and evaporated. The crude was purified by MPLC (EtOAc 1/ heptane 1) yielding thione **3** as a viscous oil (230 mg, 0.92 mmol, 92%).

$R_f$  = 0.53 ( $\text{Et}_2\text{O}$ ). IR (neat)  $\nu$ : 738, 931, 1073, 1099, 1251, 1453, 1469, 1649, 2920, 3063, 3155  $\text{cm}^{-1}$ .  $^1\text{H}$  NMR (300 MHz,  $\text{CDCl}_3$ ):  $\delta$  = 1.88 (tt,  $J$  = 5.7 and 7.1 Hz, 2H), 2.56 (dt,  $J$  = 1.1 and 7.0 Hz, 2H), 3.52 (t,  $J$  = 5.7 Hz, 2H), 4.54 (s, 2H), 6.97 (t,  $J$  = 1.1 Hz, 1H), 7.28-7.42 (m, 5H), 11.32 (br s, 1H).  $^{13}\text{C}$  NMR (75.5 MHz,  $\text{CDCl}_3$ ):  $\delta$  = 20.5,

(6) Lowik, D. W. P. M.; Liskamp, R. M. J. *Eur. J. Org. Chem.* **2000**, 1219.

(7) Langille, N. F.; Dakin, L. A.; Panek, J. S. *Org. Lett.* **2002**, 4, 2485.

27.6, 68.8, 73.4, 128.0, 128.1, 128.8, 130.6, 132.8, 137.7. LRMS (ESI):  $m/z$  = 272 ( $M+Na^+$ ). HRMS (ESI) calcd for  $C_{13}H_{15}NO_2NaS$ : 272.0721. Found: 272.0723.

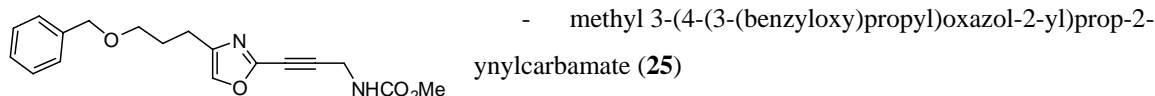

To a solution of oxazolethione **3** (48 mg, 0.192 mmol) in DMF (0.96 mL) was added copper thiophenecarboxylate (CuTc) (33.5 mg, 0.115 mmol), alkyne **4** (65 mg, 0.576 mmol),<sup>8</sup>  $Et_3N$  (2.5 mL), CuI (28 mg, 0.096 mmol) and  $Pd(PPh_3)_4$  (11.1 mg, 9.6  $\mu$ mol). The vial was sealed and heated at 100 °C under pressure in a micro-wave oven during 15 min. The mixture was then filtered on a short pad of silica (elution by  $Et_2O$ ) and concentrated under vacuum. The crude was purified on preparative HPLC ( $EtOAc$  1/ heptane 1) yielding alkyne **25** as a pale yellow oil (33 mg, 0.100 mmol, 52%).

$R_f$  = 0.38 ( $Et_2O$ ). IR (neat)  $\nu$ : 738, 1073, 1099, 1252, 1530, 1712, 3307  $cm^{-1}$ .  $^1H$  NMR (500 MHz,  $CDCl_3$ ):  $\delta$  = 1.89-1.98 (m, 2H), 2.62 (t,  $J$  = 7.3, 2H), 3.49 (t,  $J$  = 6.1 Hz, 2H), 3.70 (s, 3H), 4.16-4.26 (m, 2H), 4.49 (s, 2H), 5.24 (br s, 1H), 7.25-7.30 (m, 3H), 7.30-7.37 (m, 3H).  $^{13}C$  NMR (75.5 MHz,  $CDCl_3$ ):  $\delta$  = 22.9, 28.3, 31.4, 52.7, 69.2, 71.6, 73.0, 88.0, 127.7, 127.8, 128.5, 135.4, 138.6, 141.7, 145.7, 156.6. LRMS (ESI):  $m/z$  = 351 ( $M+Na^+$ ). HRMS (ESI) calcd for  $C_{18}H_{20}N_2O_4Na$ : 351.1321. Found: 351.1326.

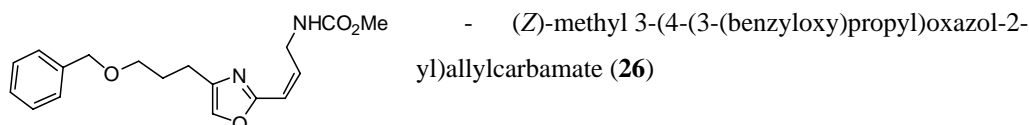

A solution of alkyne **25** (30 mg, 0.0915 mmol), quinoline (11.8 mg, 0.0915 mmol) and Lindlar catalyst (20 mg), in  $EtOAc$  (2 mL) was purged by  $H_2$ . After 2 h of stirring at room temperature, the reaction mixture was filtered on a celite pad and concentrated under vacuum. The crude mixture was purified on preparative HPLC ( $EtOAc$  1/ heptane 1) yielding alkene **26** as a pale yellow oil (28 mg, 0.0849 mmol, 93%).

$R_f$  = 0.35 ( $EtOAc$  1/ heptane 1). IR (neat)  $\nu$ : 738, 1073, 1100, 1254, 1522, 1540, 1705, 1717, 2852, 2946, 3317  $cm^{-1}$ .  $^1H$  NMR (300 MHz,  $CDCl_3$ ):  $\delta$  = 1.90-2.02 (m, 2H), 2.64 (t,  $J$  = 7.6, 2H), 3.53 (t,  $J$  = 6.2 Hz, 2H), 3.68 (s, 3H), 4.30 (t,  $J$  = 6.2 Hz, 2H), 4.51 (s, 2H), 5.59 (br s, 1H), 6.00-6.15 (m, 1H), 6.28 (d,  $J$  = 11.2 Hz, 1H), 7.24-7.32 (m, 2H), 7.32-7.36 (m, 4H).  $^{13}C$  NMR (75.5 MHz,  $CDCl_3$ ):  $\delta$  = 23.1, 28.6, 39.5, 52.3, 69.4, 73.1, 116.9, 127.7, 127.8, 128.5, 133.9, 136.1, 138.6, 141.9, 152.3, 160.0. LRMS (ESI):  $m/z$  = 353 ( $M+Na^+$ ). HRMS (ESI) calcd for  $C_{18}H_{22}N_2O_4Na$ : 353.1477. Found: 353.1481.

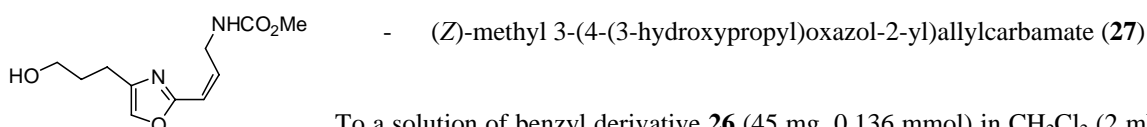

To a solution of benzyl derivative **26** (45 mg, 0.136 mmol) in  $CH_2Cl_2$  (2 mL) at -78 °C was added  $BCl_3$  (1M / hexane, 818  $\mu$ L, 0.818 mmol). The reaction was allowed to slowly reach -10 °C

(8) Prepared according to the procedure described in: Hornberger, K. R.; Hamblett, C. L.; Leighton, J. L. *J. Am. Chem. Soc.* **2000**, *122*, 12894.

over 4 h and was then quenched by addition of an aqueous saturated solution of NaHCO<sub>3</sub> (2 mL). The resulting mixture was warmed to room temperature and then extracted three times by EtOAc. Combined organic phases were dried over anhydrous Na<sub>2</sub>SO<sub>4</sub>, filtered and evaporated under vacuum. The crude mixture was purified on preparative HPLC (EtOAc 100%) yielding alcohol **27** as a colorless oil (32 mg, 0.133 mmol, 98%), the data of which corresponding to those reported in the literature.<sup>9</sup>

R<sub>f</sub> = 0.16 (EtOAc). IR (neat)  $\nu$ : 1052, 1266, 1520, 1697, 2946, 3318 cm<sup>-1</sup>. <sup>1</sup>H NMR (500 MHz, CDCl<sub>3</sub>):  $\delta$  = 1.90 (q,  $J$  = 6.6 Hz, 2H), 2.19 (br s, 1H), 2.66 (t,  $J$  = 7.0, 2H), 3.68 (br s, 3H), 3.72 (t,  $J$  = 6.1 Hz, 2H), 4.32 (br s, 2H), 5.52 (br s, 1H), 6.09 (dt,  $J$  = 5.2, and 11.6 Hz, 1H), 6.29 (d,  $J$  = 11.6 Hz, 1H), 7.37 (s, 1H). <sup>13</sup>C NMR (75.5 MHz, CDCl<sub>3</sub>):  $\delta$  = 22.8, 31.3, 39.6, 52.3, 62.0, 116.4, 134.0, 136.7, 141.6, 157.3, 160.1. LRMS (ESI):  $m/z$  = 263 (M+Na<sup>+</sup>). HRMS (ESI) calcd for C<sub>11</sub>H<sub>16</sub>N<sub>2</sub>O<sub>4</sub>Na: 263.1008. Found: 263.1003.

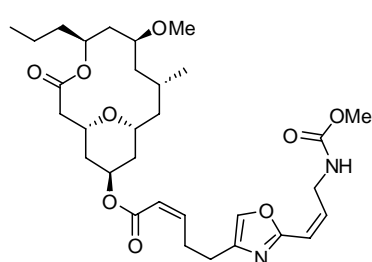

- (+)-Neopeltolide (**1**)

To a solution of alcohol **23** (5.5 mg, 16.36  $\mu$ mol), acid **28** (6.6 mg, 23.57  $\mu$ mol) and PPh<sub>3</sub> (7.5 mg, 28.6  $\mu$ mol) in dry benzene (0.7 mL) was added DIAD (0.5 M solution, 57  $\mu$ L, 28.6  $\mu$ mol) and the resulting mixture was stirred at room temperature for 70 min. Then, the reaction mixture was concentrated under vacuum and the residue was purified by preparative HPLC (EtOAc 2/ heptane 3) yielding (+)-Neopeltolide (**1**) (7.5 mg, 12.69  $\mu$ mol, 75%) as a colorless oil, the data of which matching those reported in the literature.<sup>10</sup>

R<sub>f</sub> = 0.25 (EtOAc 1/ heptane 1). IR (neat)  $\nu$ : 991, 1031, 1063, 1083, 1179, 1247, 1271, 1518, 1713, 2871, 2917, 2952, 3342. <sup>1</sup>H NMR (500 MHz, CD<sub>3</sub>OD):  $\delta$  = 0.94 (t,  $J$  = 7.3 Hz, 3H), 0.97 (d,  $J$  = 6.7 Hz, 3H), 1.12 (ddd,  $J$  = 2.2, 10.5 and 13.3 Hz, 1H), 1.22–1.46 (m, 6H), 1.47–1.62 (m, 4H), 1.64–1.76 (m, 2H), 1.80–1.85 (m, 1H), 1.86 (dd,  $J$  = 11.3 and 14.6 Hz, 1H), 2.29 (dd,  $J$  = 11.0 and 14.6 Hz, 1H), 2.66–2.71 (m, 1H), 2.72 (t,  $J$  = 7.3 Hz, 2H), 2.97–3.05 (m, 2H), 3.28 (s, 3H), 3.57 (t,  $J$  = 9.8 Hz, 1H), 3.63–3.71 (m, 1H), 3.65 (s, 3H), 4.02–4.11 (m, 1H), 4.30 (d,  $J$  = 4.6 Hz, 2H), 5.17 (dt,  $J$  = 4.6 and 9.5 Hz, 1H), 5.19–5.22 (m, 1H), 5.88 (d,  $J$  = 11.6 Hz, 1H), 6.04 (td,  $J$  = 6.1 and 11.9 Hz, 1H), 6.27 (dt,  $J$  = 2.1 and 11.9 Hz, 1H), 6.37 (td,  $J$  = 7.5 and 11.5 Hz, 1H), 7.66 ppm (s, 1H). <sup>13</sup>C NMR (125 MHz, CD<sub>3</sub>OD):  $\delta$  = 14.1, 20.0, 26.0, 26.4, 29.0, 32.6, 36.2, 37.4, 38.0, 41.0, 43.2, 43.5, 45.2, 52.6, 56.4, 69.2, 71.3, 73.9, 77.06, 77.12, 115.9, 121.7, 135.9, 139.2, 142.3, 150.0, 159.6, 161.9, 166.9, 173.0. LRMS (ESI):  $m/z$  = 613 (M+Na<sup>+</sup>). HRMS (ESI) calcd for C<sub>31</sub>H<sub>46</sub>N<sub>2</sub>O<sub>9</sub>Na: 613.3101. found: 613.3101. [ $\alpha$ ]<sub>D</sub><sup>27</sup> = +24.4 (c 0.24, MeOH), *lit.*<sup>3,10</sup> [ $\alpha$ ]<sub>D</sub><sup>20</sup> = +24.0 (c 0.24, MeOH).

(9) Dakin, L. A.; Langille, N. F.; Panek, J. S. *J. Org. Chem.* **2002**, *67*, 6812.

(10) Wright, A. E.; Cook Botelho, J.; Guzmán, E.; Harmody, D.; Linley, P.; McCarthy, P. J.; Pitts, T. P.; Pomponi, S. A.; Reed, J. K. *J. Nat. Prod.* **2007**, *70*, 412.

7,  $^1\text{H}$  NMR (300 MHz,  $\text{CDCl}_3$ ) and  $^{13}\text{C}$  NMR (75.5 MHz,  $\text{CDCl}_3$ )

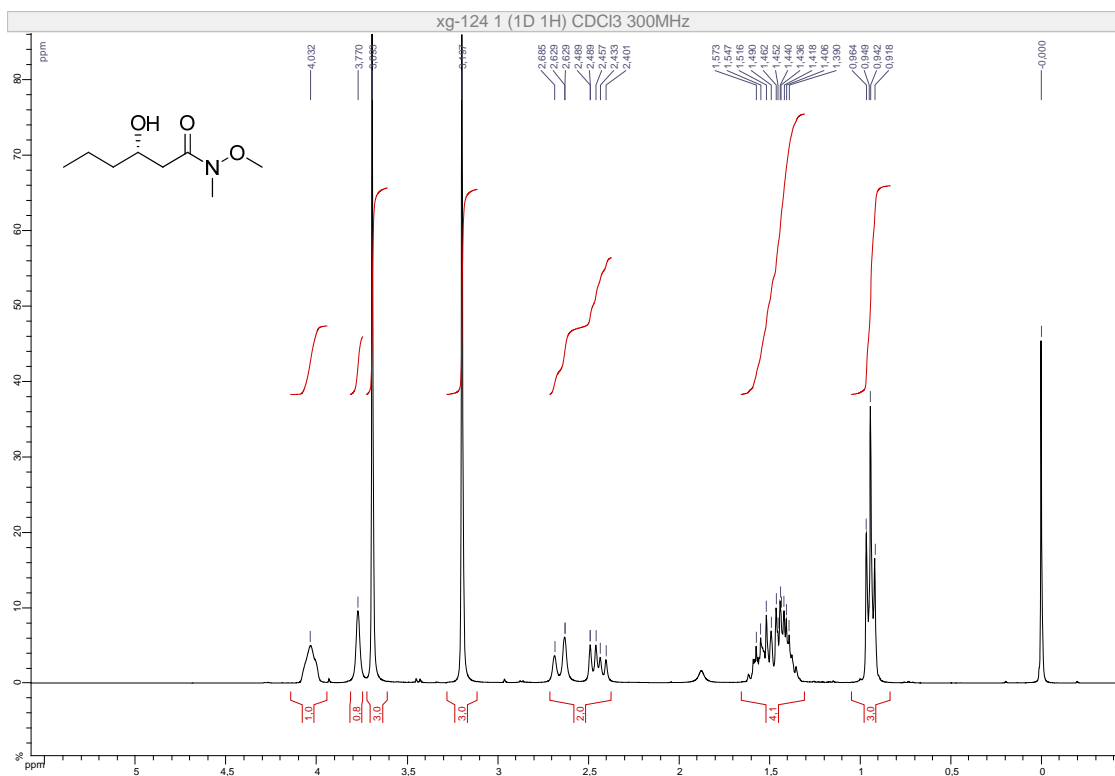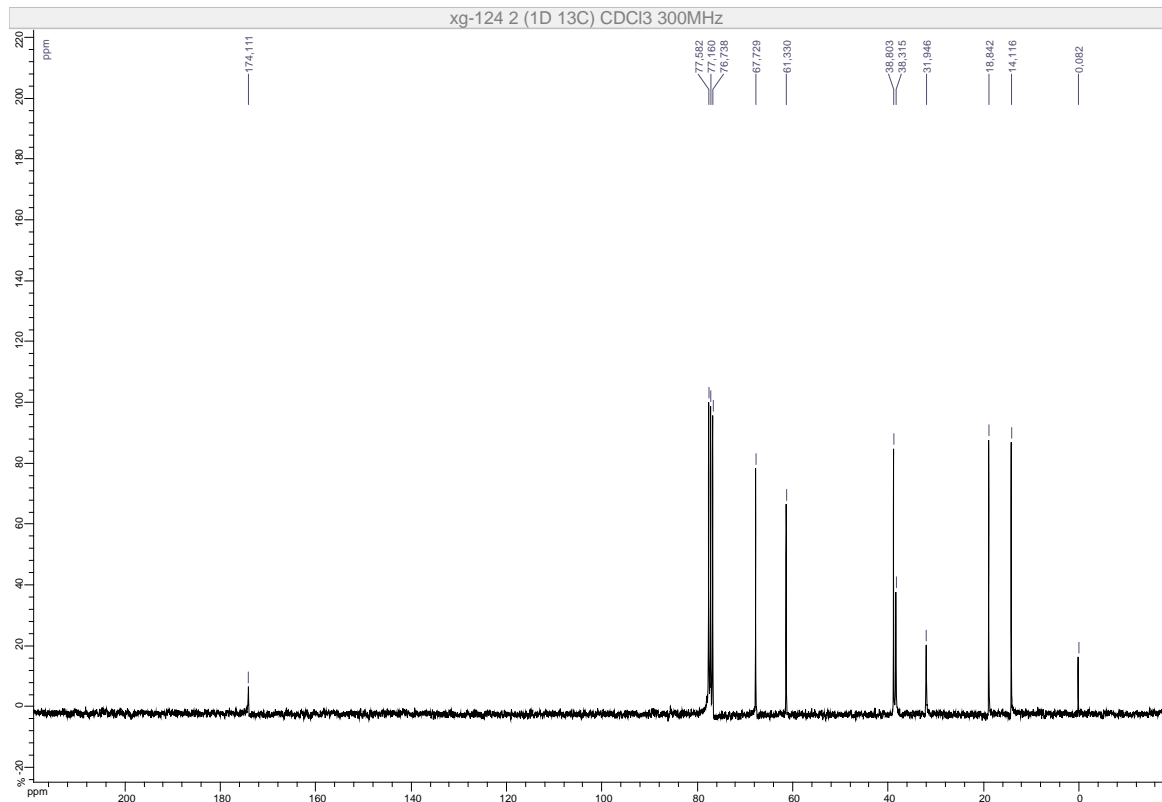

**8**,  $^1\text{H}$  NMR (500 MHz,  $\text{CDCl}_3$ ) and  $^{13}\text{C}$  NMR (75.5 MHz,  $\text{CDCl}_3$ )

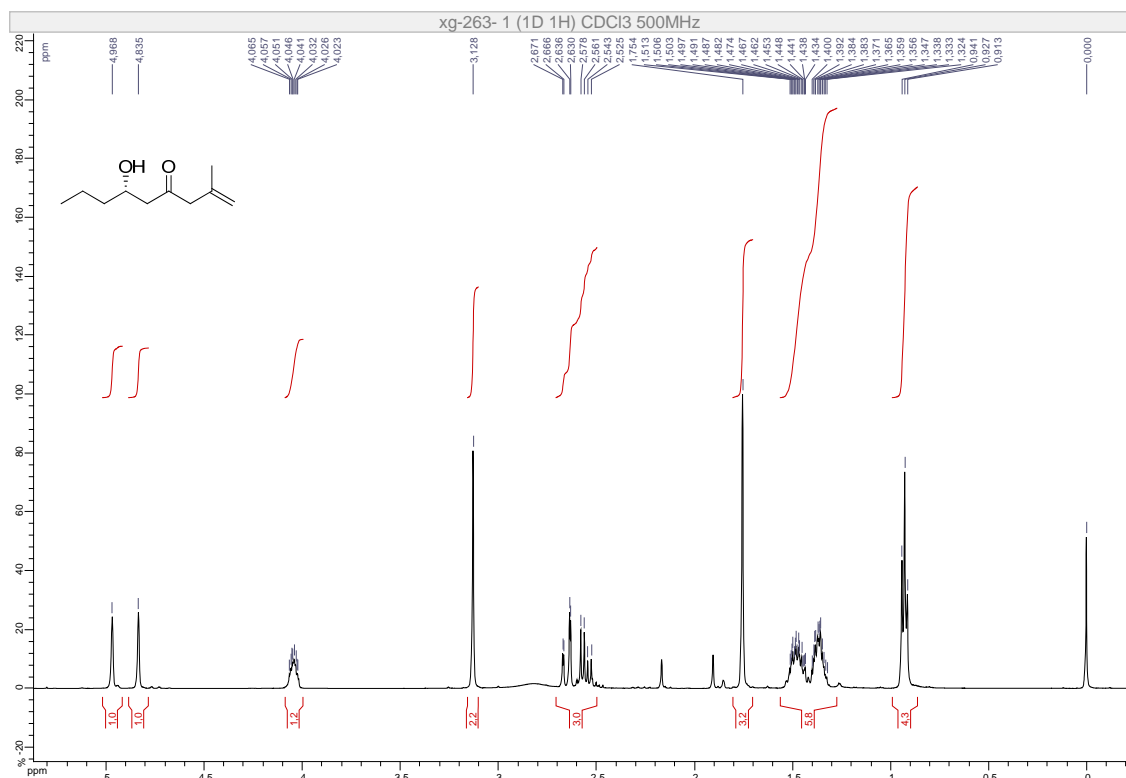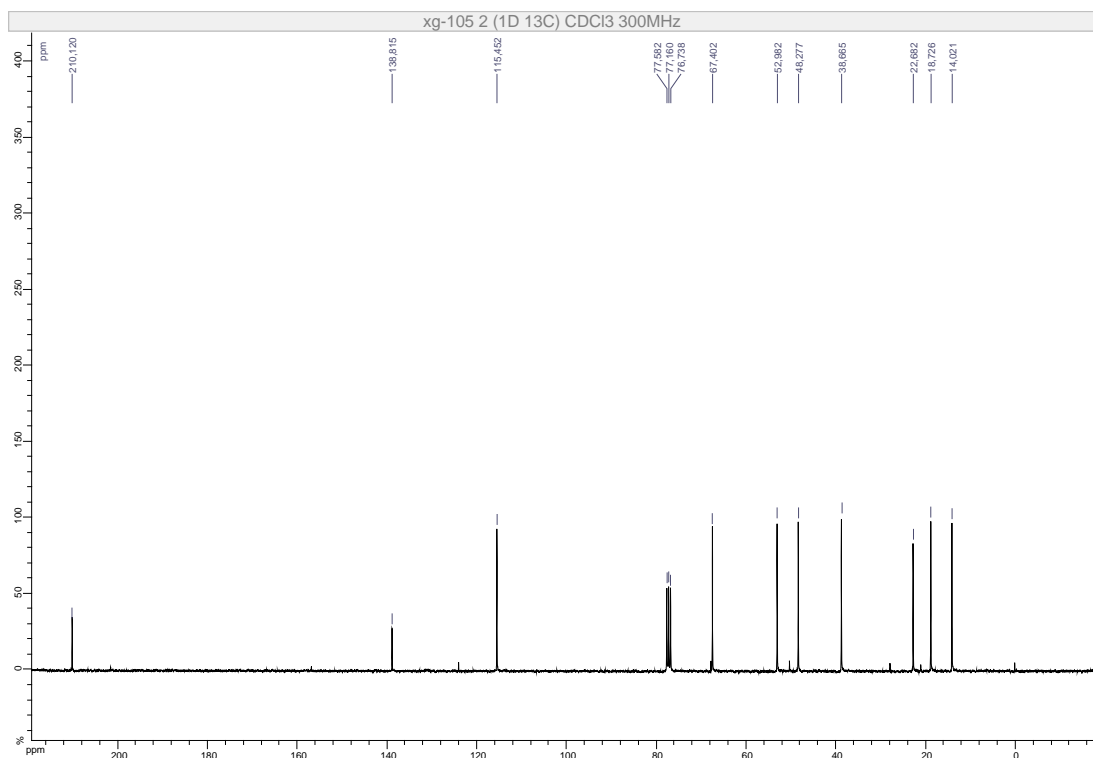

9,  $^1\text{H}$  NMR (300 MHz,  $\text{CDCl}_3$ ) and  $^{13}\text{C}$  NMR (75.5 MHz,  $\text{CDCl}_3$ )

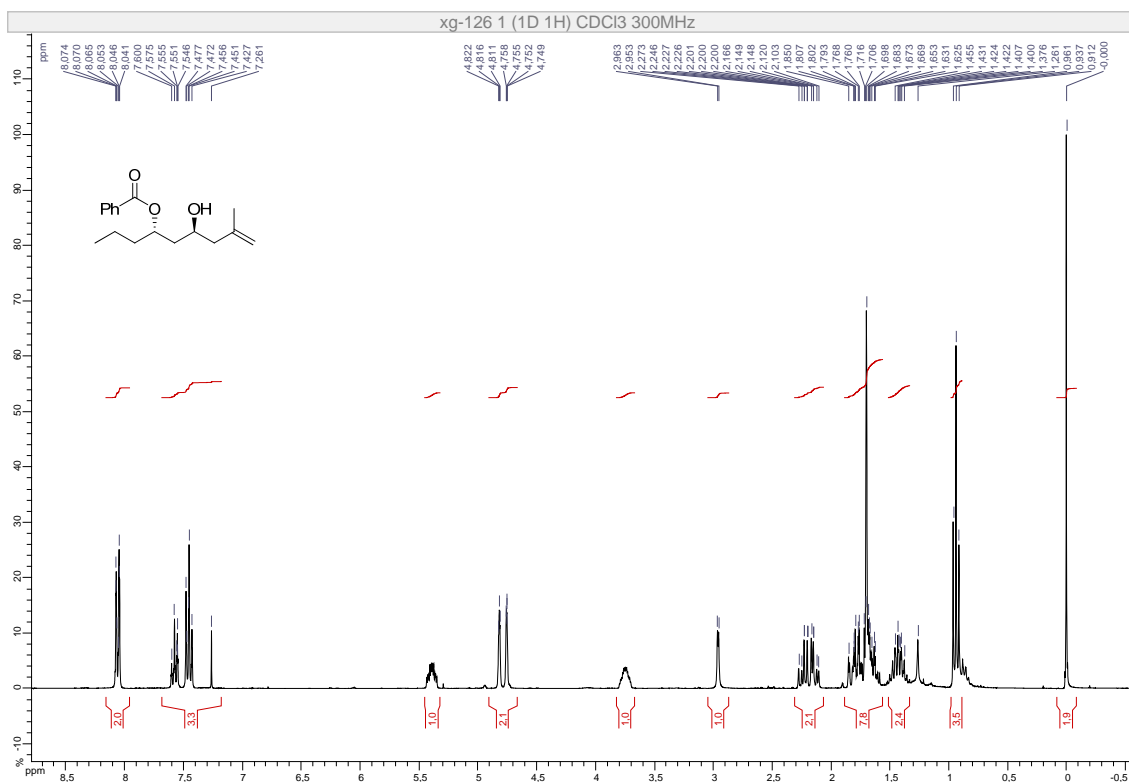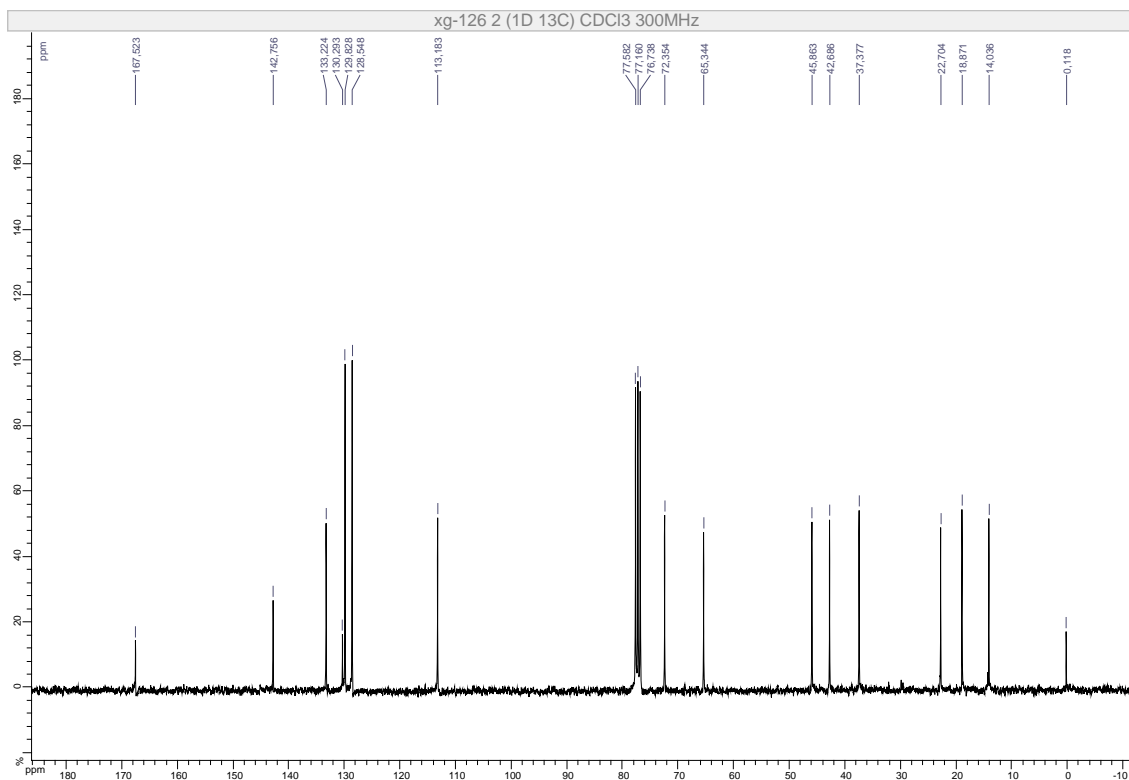



**10**,  $^1\text{H}$  NMR (300 MHz,  $\text{CDCl}_3$ ) and  $^{13}\text{C}$  NMR (75.5 MHz,  $\text{CDCl}_3$ )

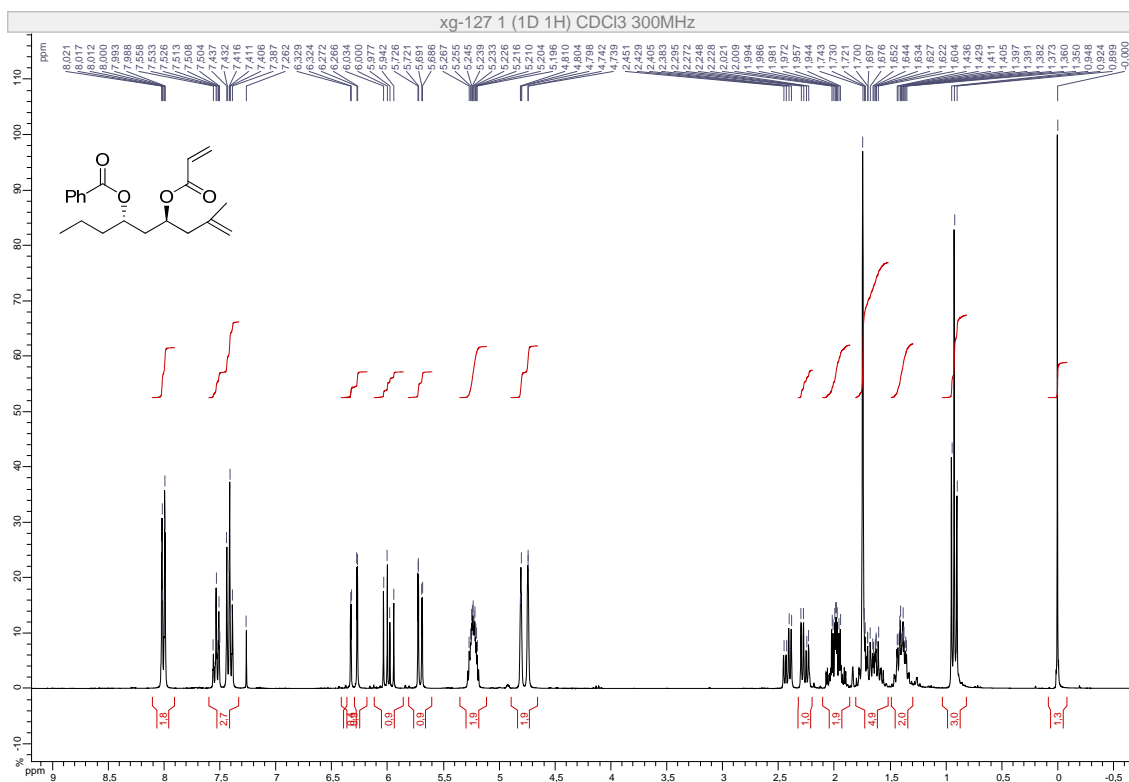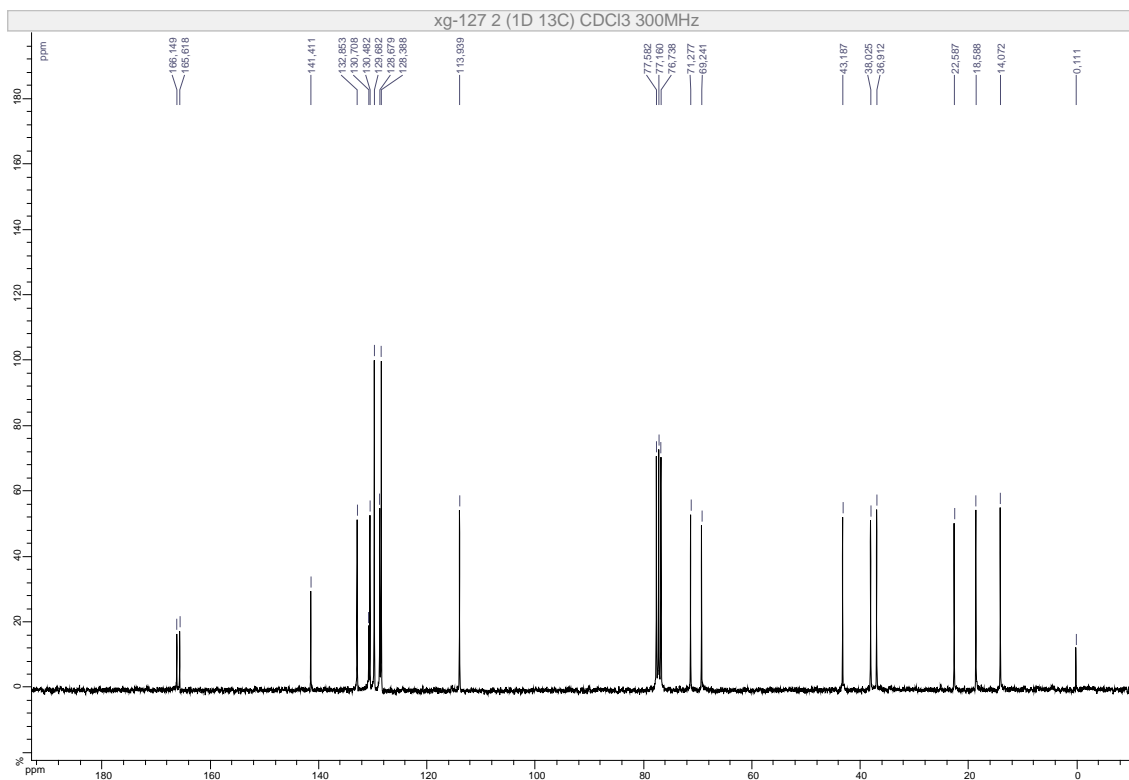

**11**,  $^1\text{H}$  NMR (300 MHz,  $\text{CDCl}_3$ ) and  $^{13}\text{C}$  NMR (75.5 MHz,  $\text{CDCl}_3$ )

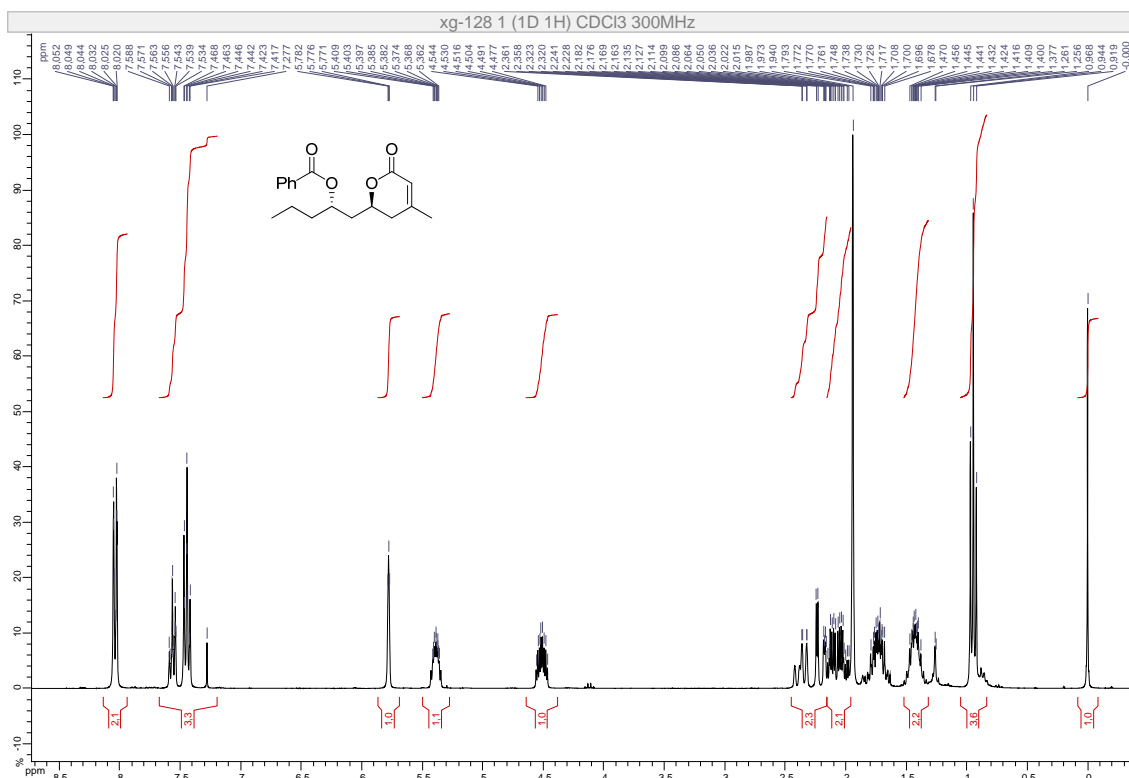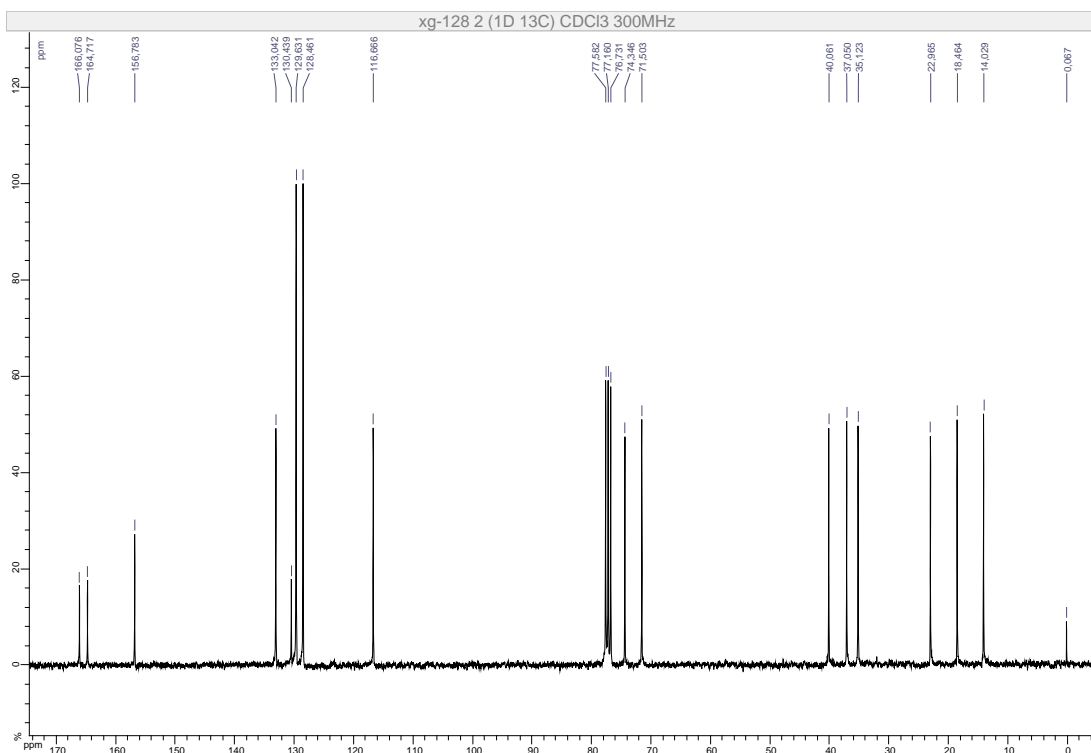

**13,**  $^1\text{H}$  NMR (300 MHz,  $\text{CD}_3\text{COCD}_3$ ) and  $^{13}\text{C}$  NMR (75.5 MHz,  $\text{CD}_3\text{COCD}_3$ )

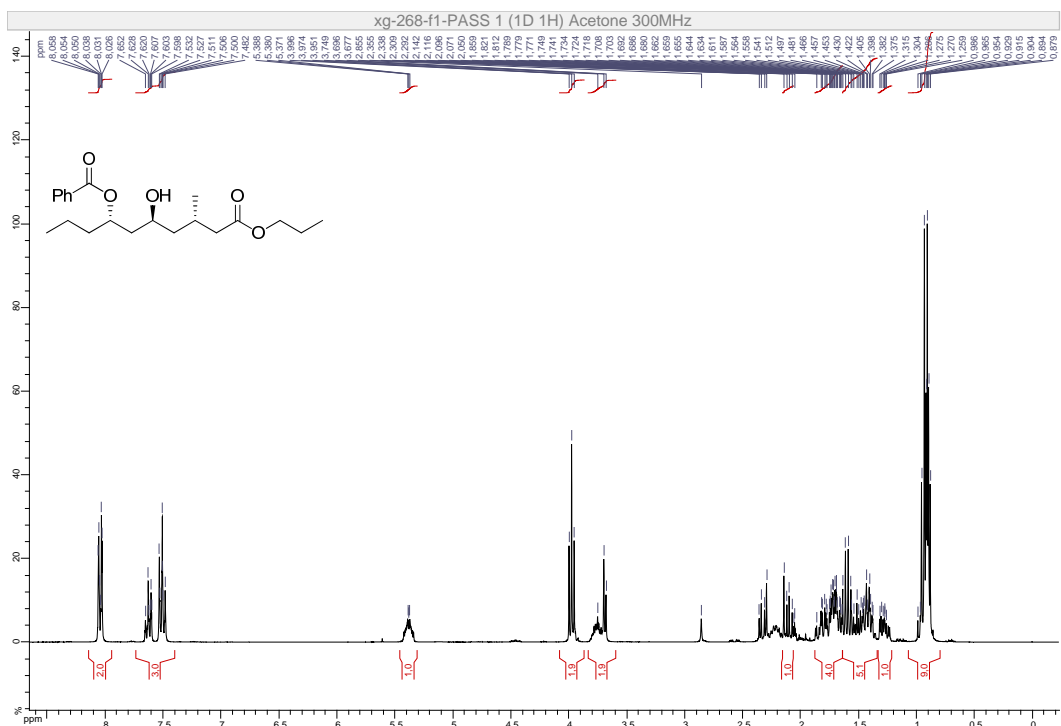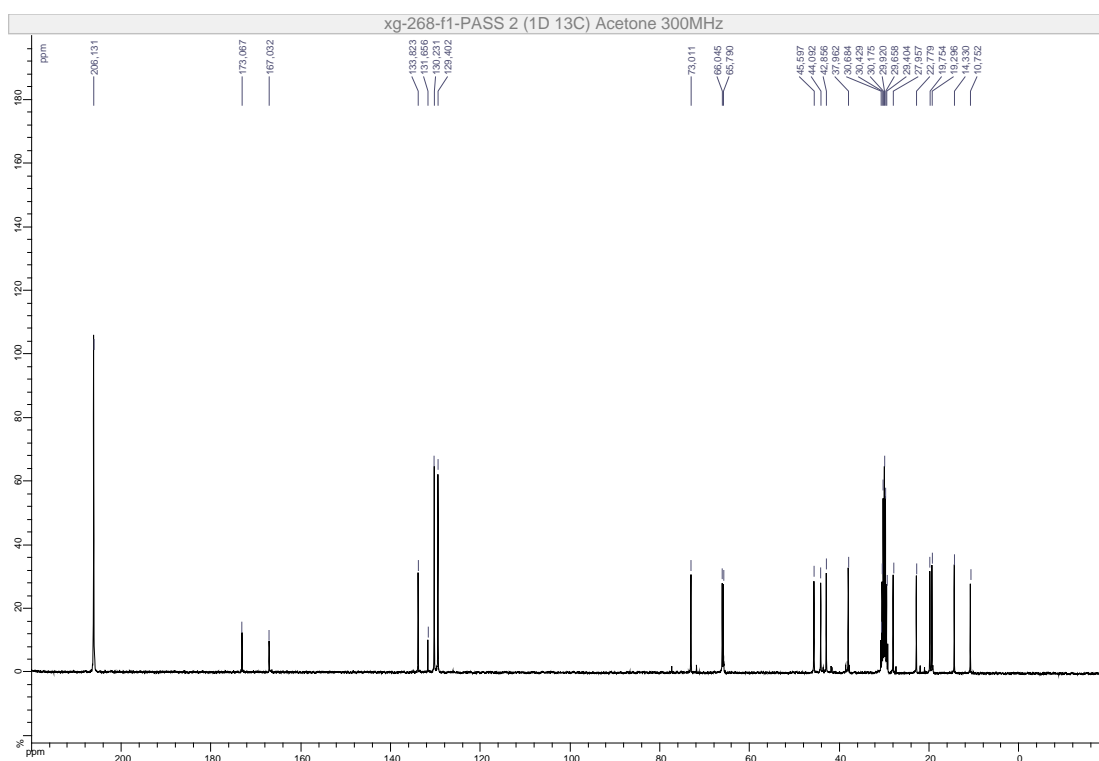

**12,**  $^1\text{H}$  NMR (300 MHz,  $\text{CDCl}_3$ ) and  $^{13}\text{C}$  NMR (75.5 MHz,  $\text{CDCl}_3$ )

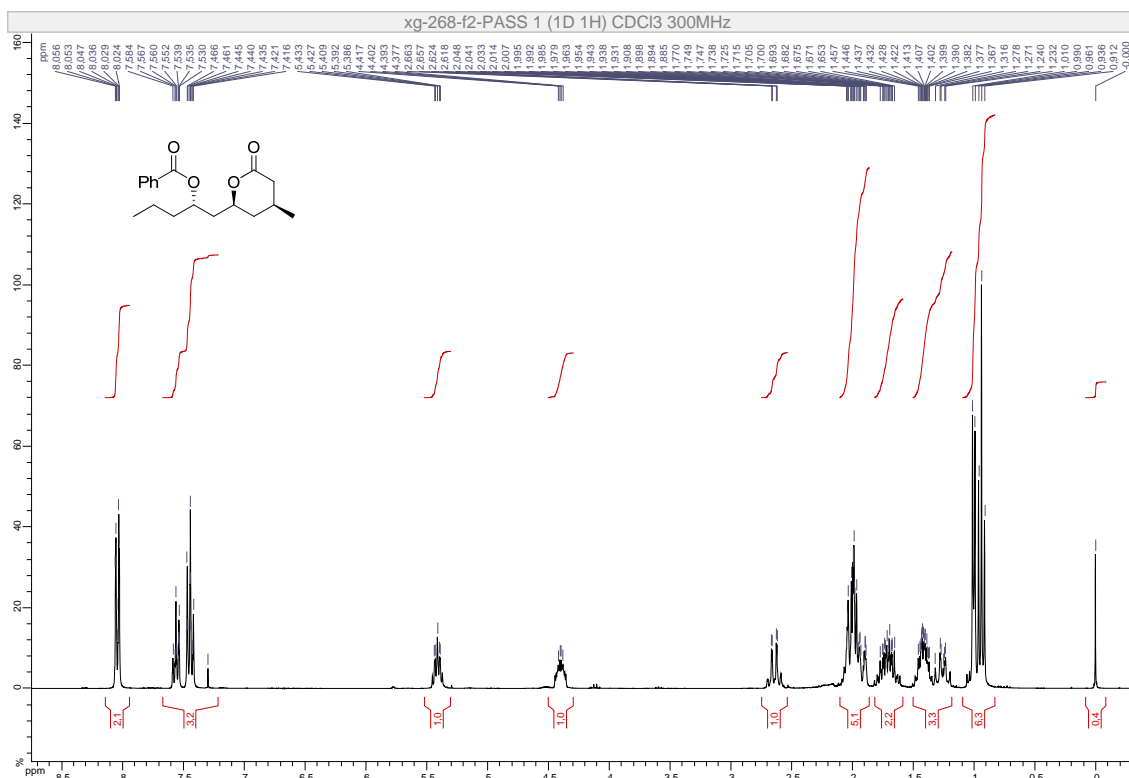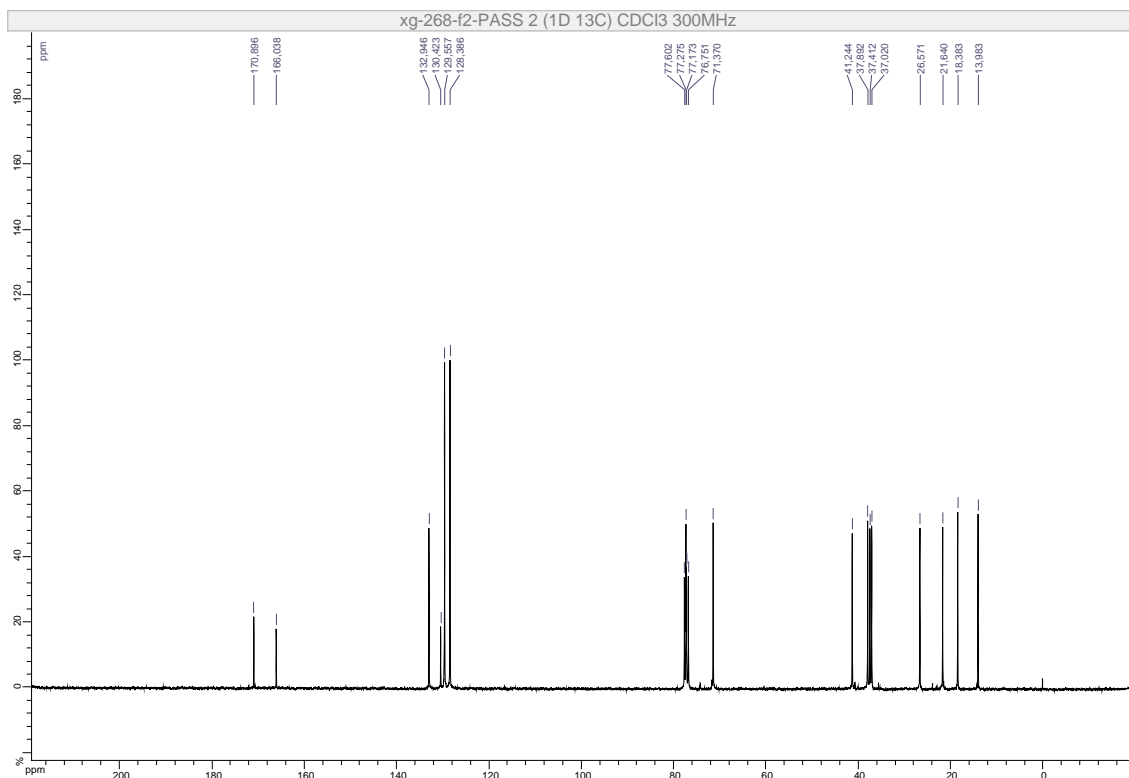

**14,**  $^1\text{H}$  NMR (300 MHz,  $\text{CDCl}_3$ ) and  $^{13}\text{C}$  NMR (75.5 MHz,  $\text{CDCl}_3$ )

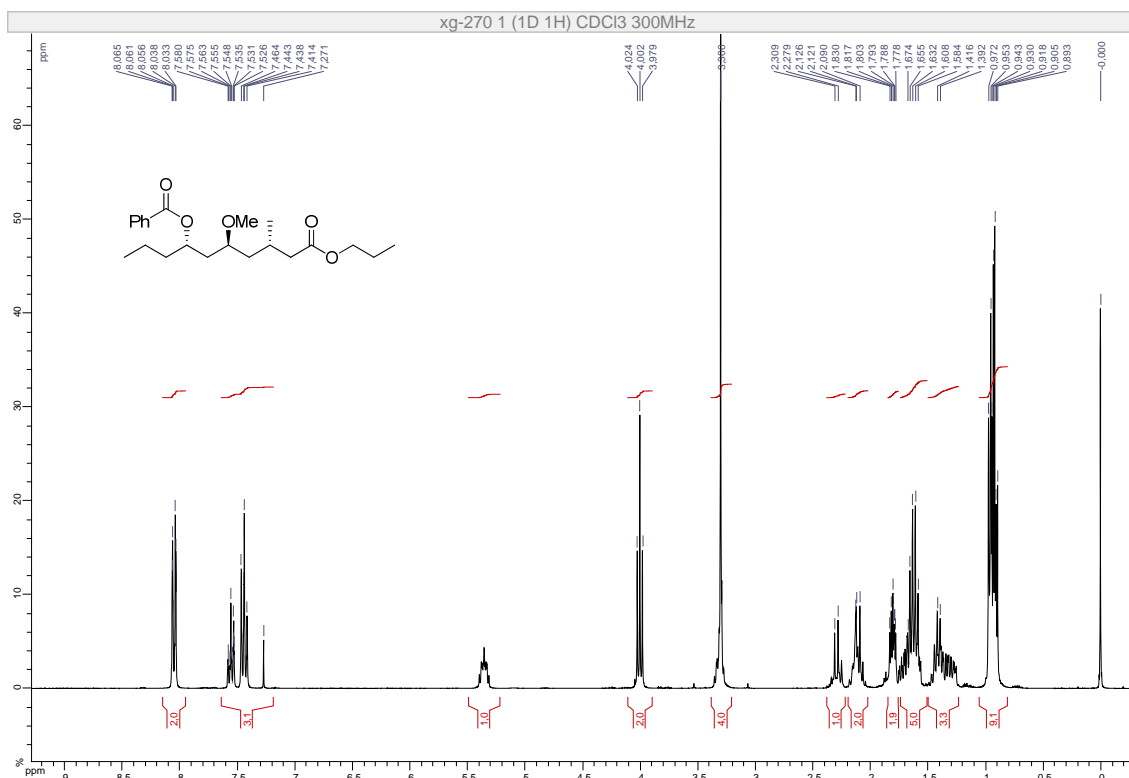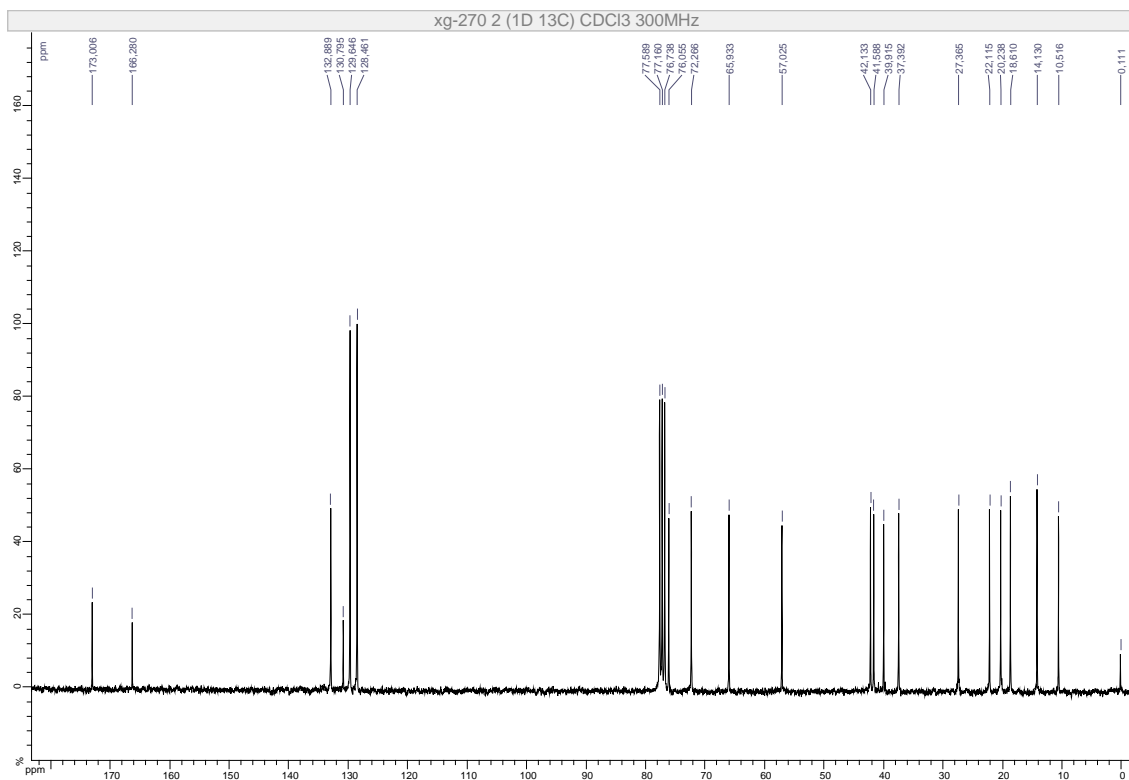

**15**,  $^1\text{H}$  NMR (500 MHz,  $\text{CDCl}_3$ ) and  $^{13}\text{C}$  NMR (75.5 MHz,  $\text{CDCl}_3$ )

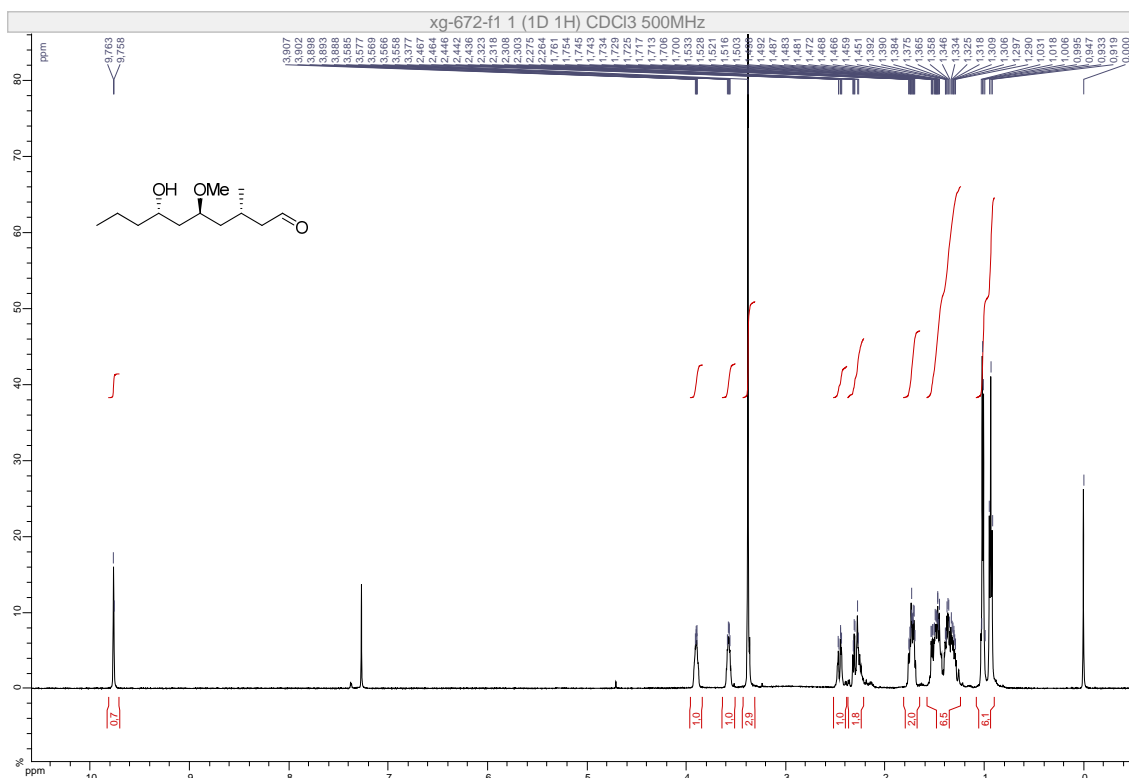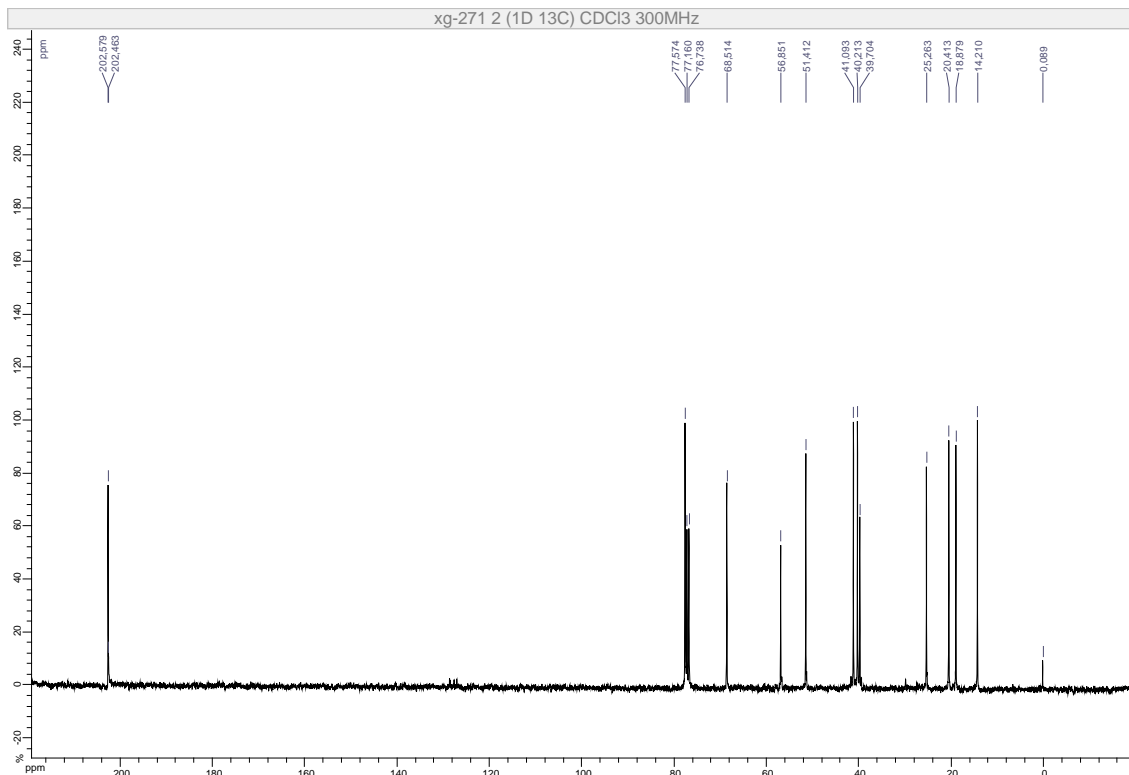

**2**,  $^1\text{H}$  NMR (500 MHz,  $\text{CDCl}_3$ ) and  $^{13}\text{C}$  NMR (75.5 MHz,  $\text{CDCl}_3$ )

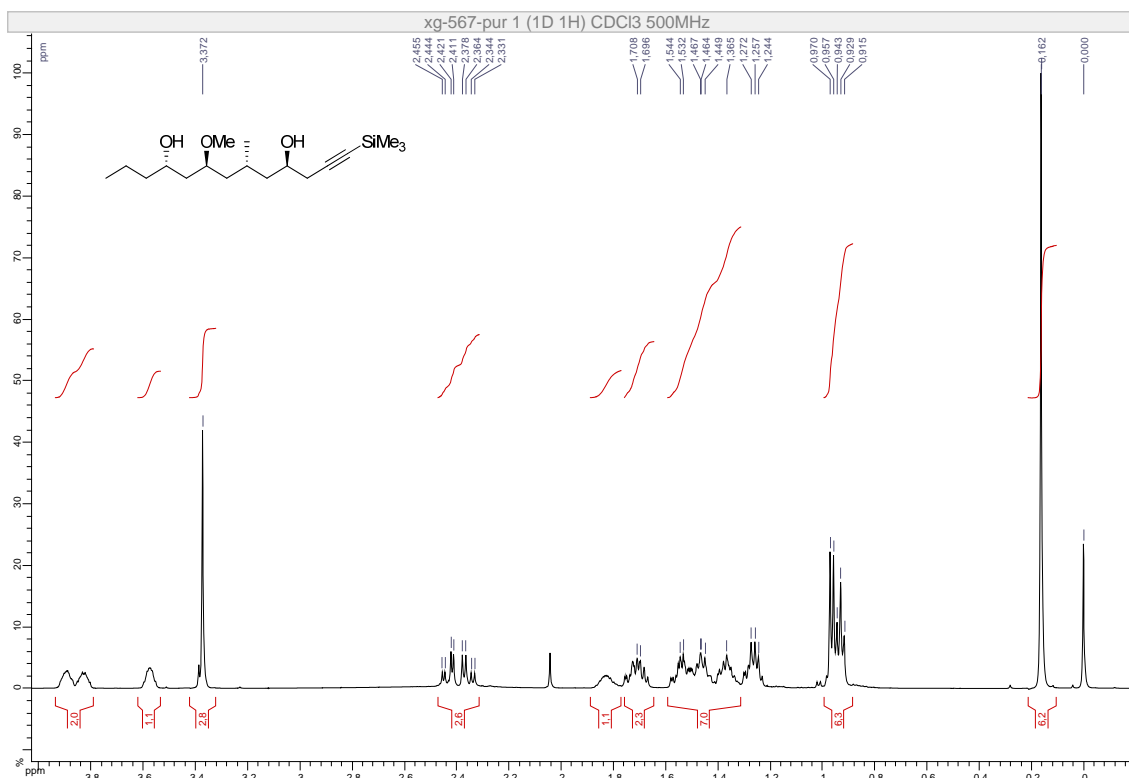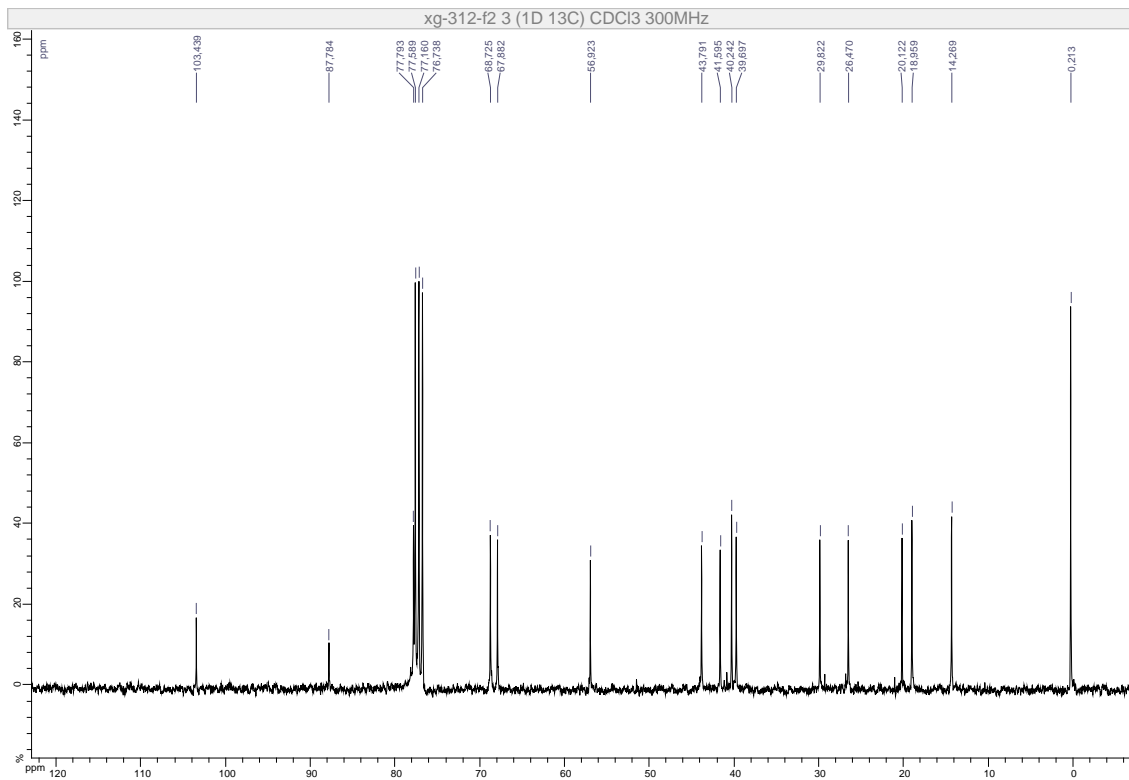

Chemical structure of the compound is shown above the spectrum. The structure is a branched alkane with a terminal alkyne group, a hydroxyl group, and a methoxy group. The chemical formula is  $C_{14}H_{26}O_2$ .

The  $^1H$  NMR spectrum (CDCl<sub>3</sub>, 300 MHz) shows the following peaks (ppm) and integrations:

- 3.899, 3.889, 3.878, 3.868, 3.848 (m, 3H, integration 2.1)
- 3.594 (s, 3H, integration 1.1)
- 3.394, 3.372 (d, 2H, integration 3.1)
- 2.596, 2.542, 2.542, 2.433, 2.425, 2.386, 2.385, 2.387, 2.377, 2.368, 2.353, 2.345, 2.345, 2.310, 2.298, 2.289, 2.273, 2.064, 1.743, 1.708, 1.697, 1.687, 1.575, 1.565, 1.545, 1.536, 1.516, 1.496, 1.487, 1.466, 1.459, 1.442, 1.435, 1.414, 1.405, 1.388, 1.371, 1.361, 1.345, 1.338, 1.327, 1.273, 1.260, 1.250, 1.230, 1.0955, 1.0928, 1.0905 (m, 11H, integration 11.5)
- 0.977, 0.955, 0.928, 0.905 (m, 3H, integration 5.2)
- 0.000 (s, 3H, integration 0.6)

The spectrum is consistent with the chemical structure of the compound.

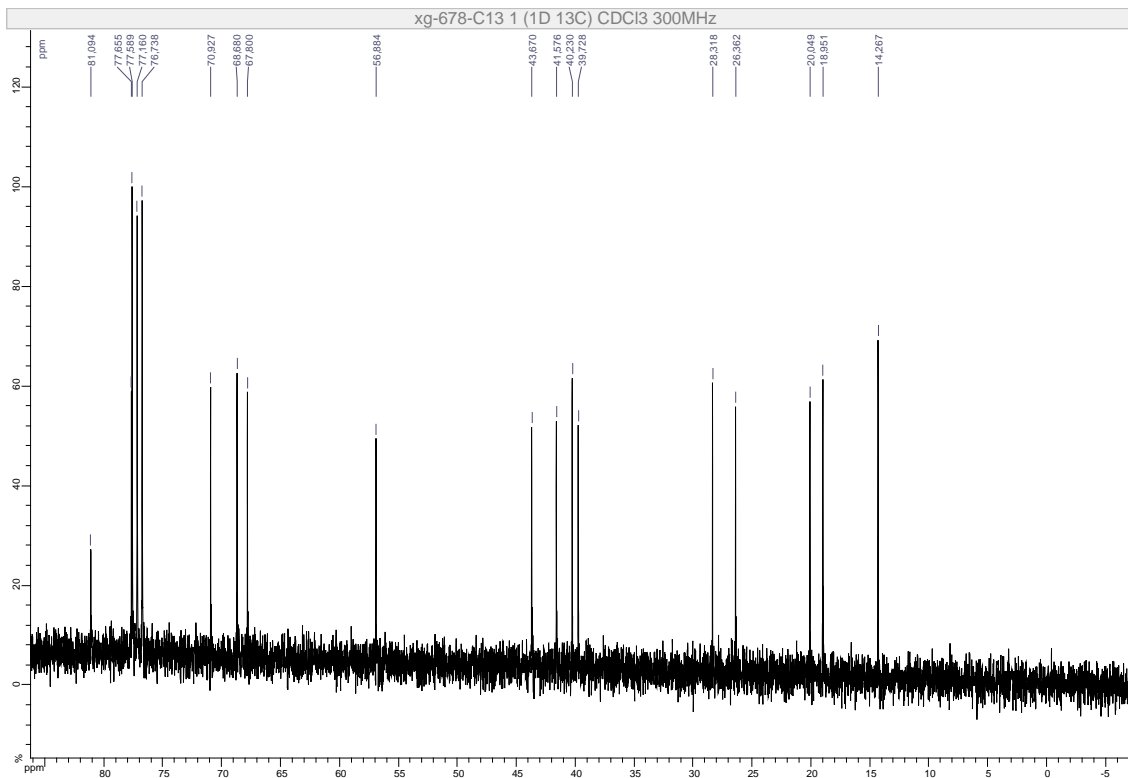



Chemical structure of compound 1 (a bicyclic ether with a trimethylsilyl group and a methoxy group) is shown above the spectrum. The spectrum displays peaks corresponding to the structure, with integration values (in red) and chemical shifts (in ppm) indicated. The x-axis represents chemical shift in ppm, ranging from 0 to 10. The y-axis represents intensity. The spectrum shows several peaks, including a large peak at approximately 0.1 ppm (integration 9.00), a peak at approximately 0.3 ppm (integration 8.0), a peak at approximately 1.2 ppm (integration 2.8), a peak at approximately 1.5 ppm (integration 3.6), a peak at approximately 1.8 ppm (integration 3.4), a peak at approximately 2.1 ppm (integration 2.0), a peak at approximately 2.3 ppm (integration 1.0), a peak at approximately 2.5 ppm (integration 1.0), a peak at approximately 2.7 ppm (integration 1.0), a peak at approximately 3.0 ppm (integration 0.9), a peak at approximately 3.3 ppm (integration 3.8), a peak at approximately 3.5 ppm (integration 1.0), a peak at approximately 3.7 ppm (integration 1.0), a peak at approximately 3.9 ppm (integration 1.0), a peak at approximately 4.1 ppm (integration 1.0), a peak at approximately 4.3 ppm (integration 1.0), a peak at approximately 4.5 ppm (integration 1.0), a peak at approximately 4.7 ppm (integration 1.0), a peak at approximately 4.9 ppm (integration 1.0), a peak at approximately 5.1 ppm (integration 1.0), a peak at approximately 5.3 ppm (integration 1.0), a peak at approximately 5.5 ppm (integration 1.0), a peak at approximately 5.7 ppm (integration 1.0), a peak at approximately 5.9 ppm (integration 1.0), a peak at approximately 6.1 ppm (integration 1.0), a peak at approximately 6.3 ppm (integration 1.0), a peak at approximately 6.5 ppm (integration 1.0), a peak at approximately 6.7 ppm (integration 1.0), a peak at approximately 6.9 ppm (integration 1.0), a peak at approximately 7.1 ppm (integration 1.0), a peak at approximately 7.3 ppm (integration 1.0), a peak at approximately 7.5 ppm (integration 1.0), a peak at approximately 7.7 ppm (integration 1.0), a peak at approximately 7.9 ppm (integration 1.0), a peak at approximately 8.1 ppm (integration 1.0), a peak at approximately 8.3 ppm (integration 1.0), a peak at approximately 8.5 ppm (integration 1.0), a peak at approximately 8.7 ppm (integration 1.0), a peak at approximately 8.9 ppm (integration 1.0), a peak at approximately 9.1 ppm (integration 1.0), a peak at approximately 9.3 ppm (integration 1.0), a peak at approximately 9.5 ppm (integration 1.0), a peak at approximately 9.7 ppm (integration 1.0), a peak at approximately 9.9 ppm (integration 1.0).

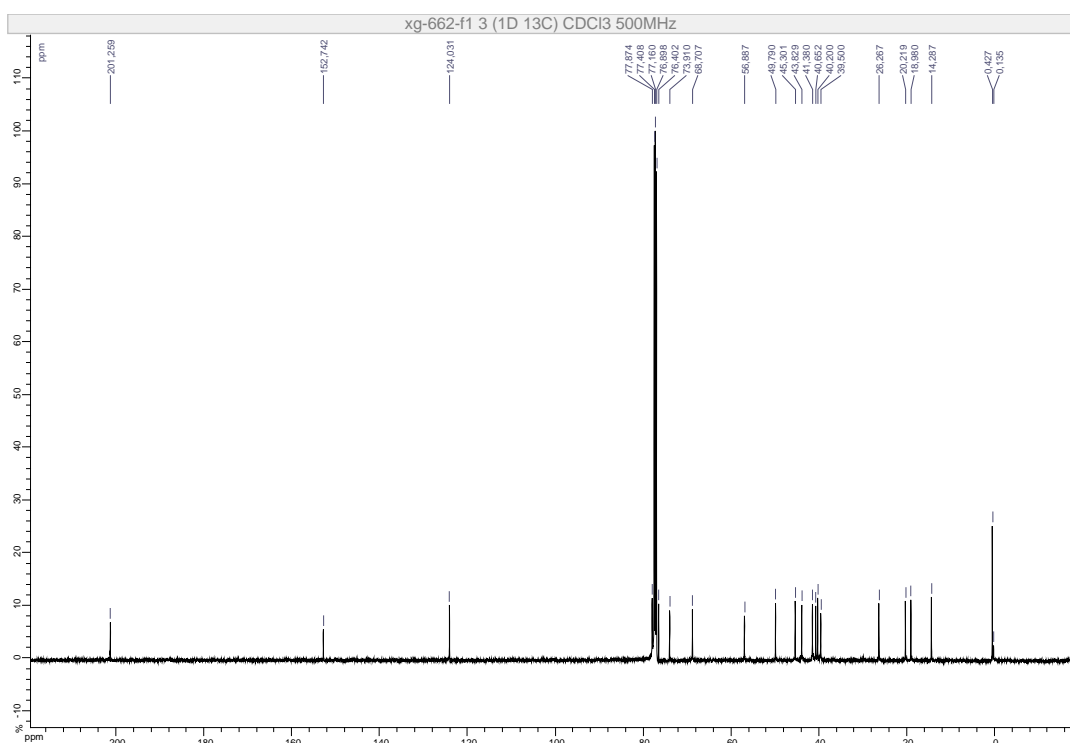

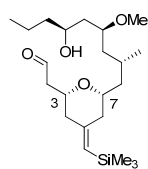

**17**, NOESY  $^1\text{H}/^1\text{H}$  NMR (500 MHz,  $\text{CDCl}_3$ )

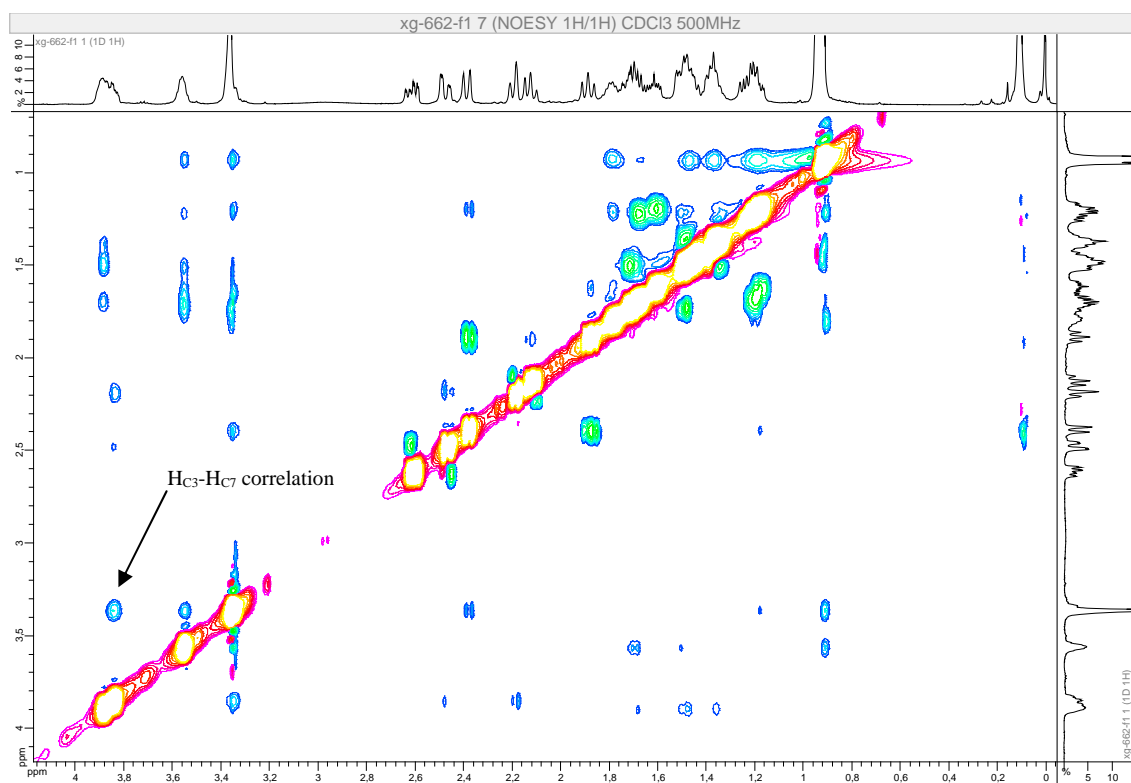

19,  $^1\text{H}$  NMR (500 MHz,  $\text{CDCl}_3$ )

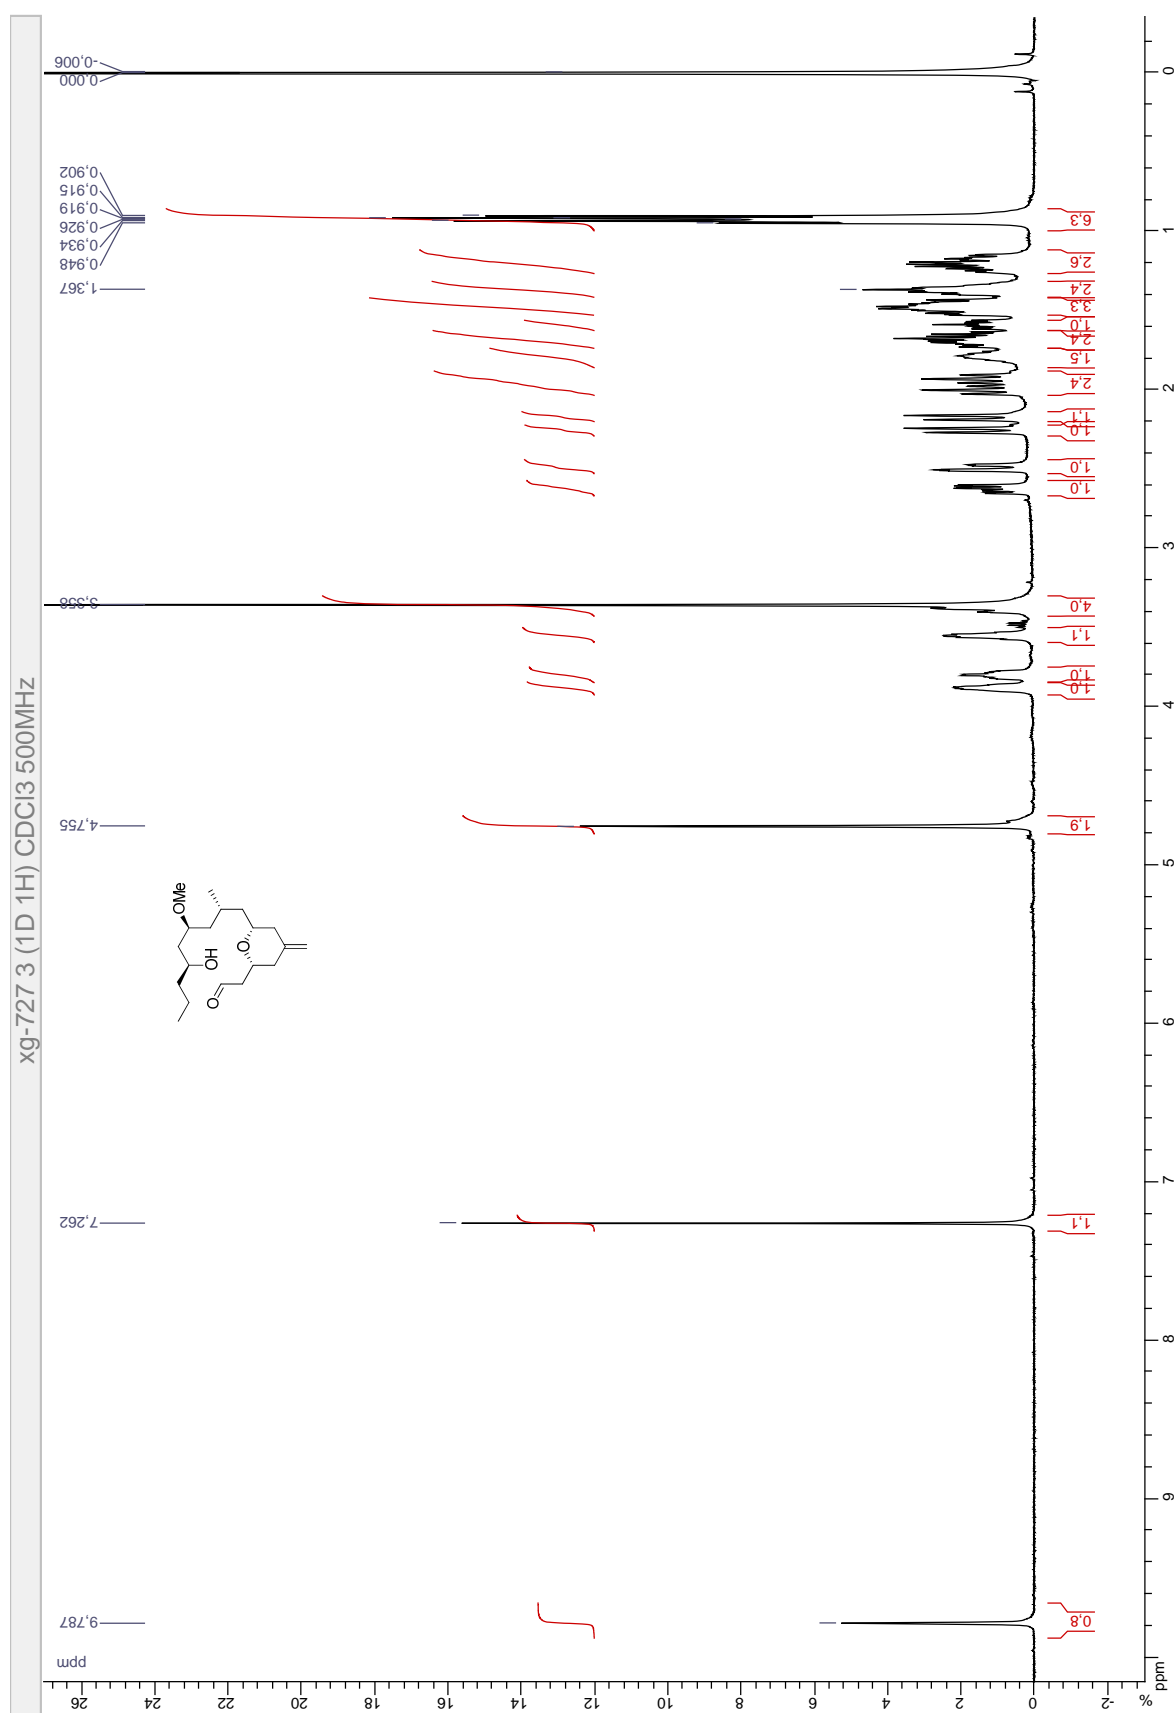

$^{13}\text{C}$  NMR (125.5 MHz,  $\text{CDCl}_3$ )

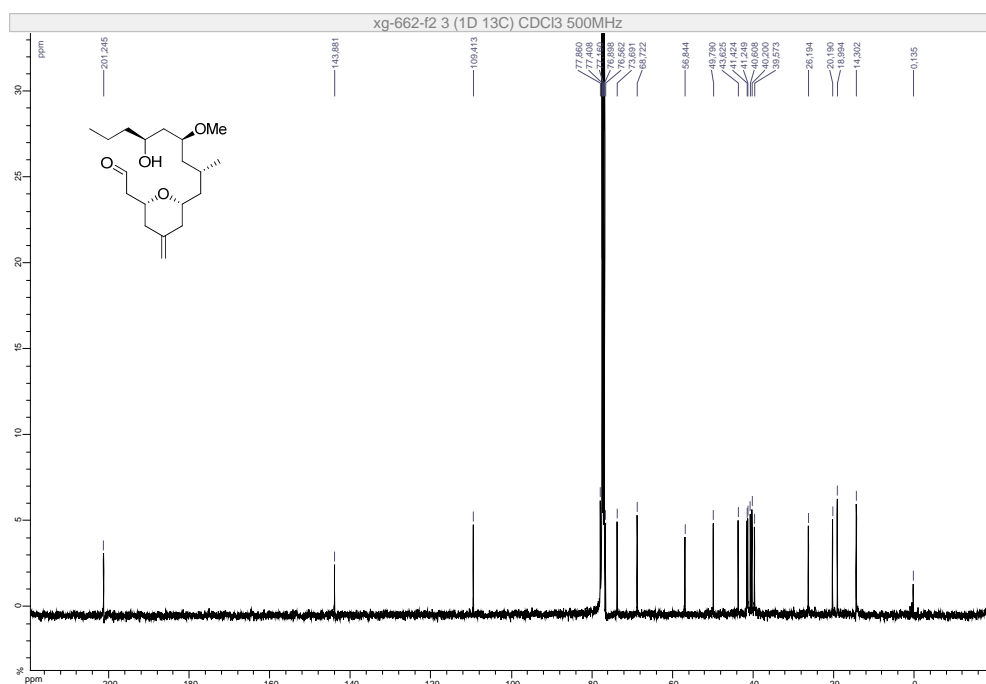

19, NOESY  $^1\text{H}/^1\text{H}$  NMR (500 MHz,  $\text{CDCl}_3$ )

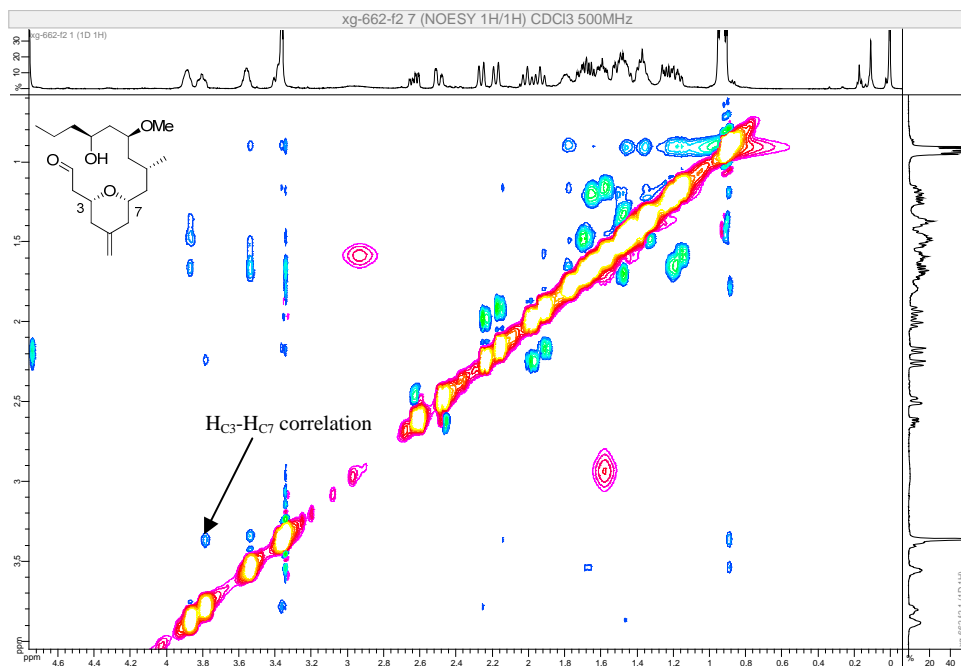

**20**,  $^1\text{H}$  NMR (500 MHz,  $\text{CDCl}_3$ ) and  $^{13}\text{C}$  NMR (125.5 MHz,  $\text{CDCl}_3$ )

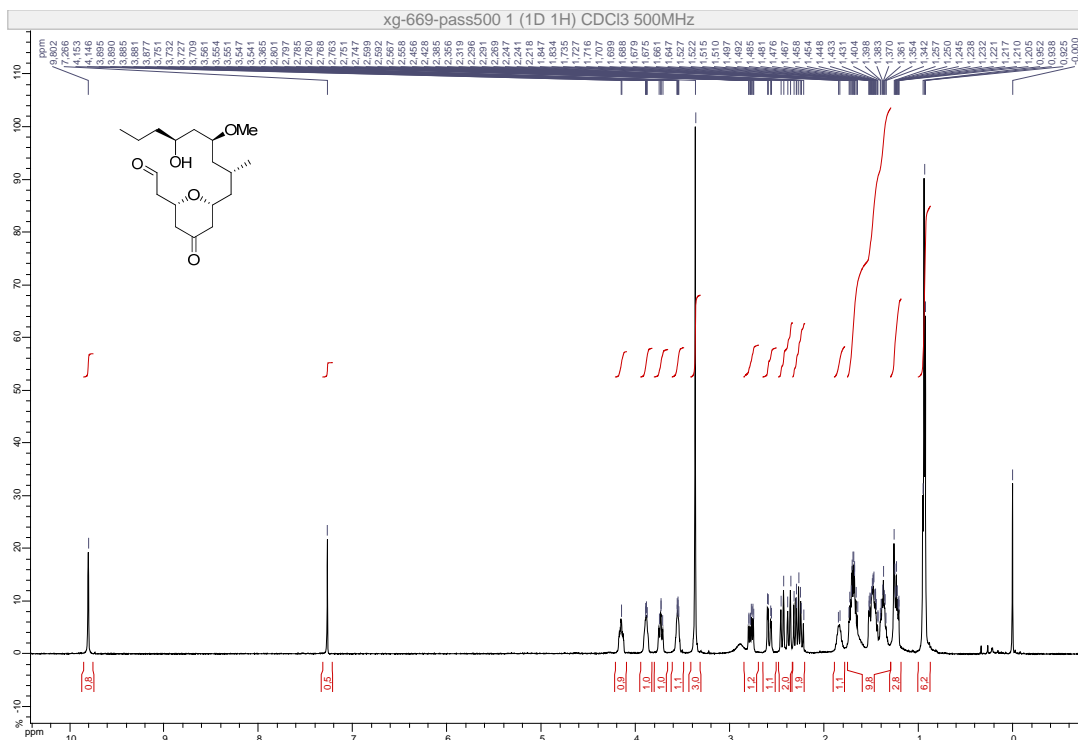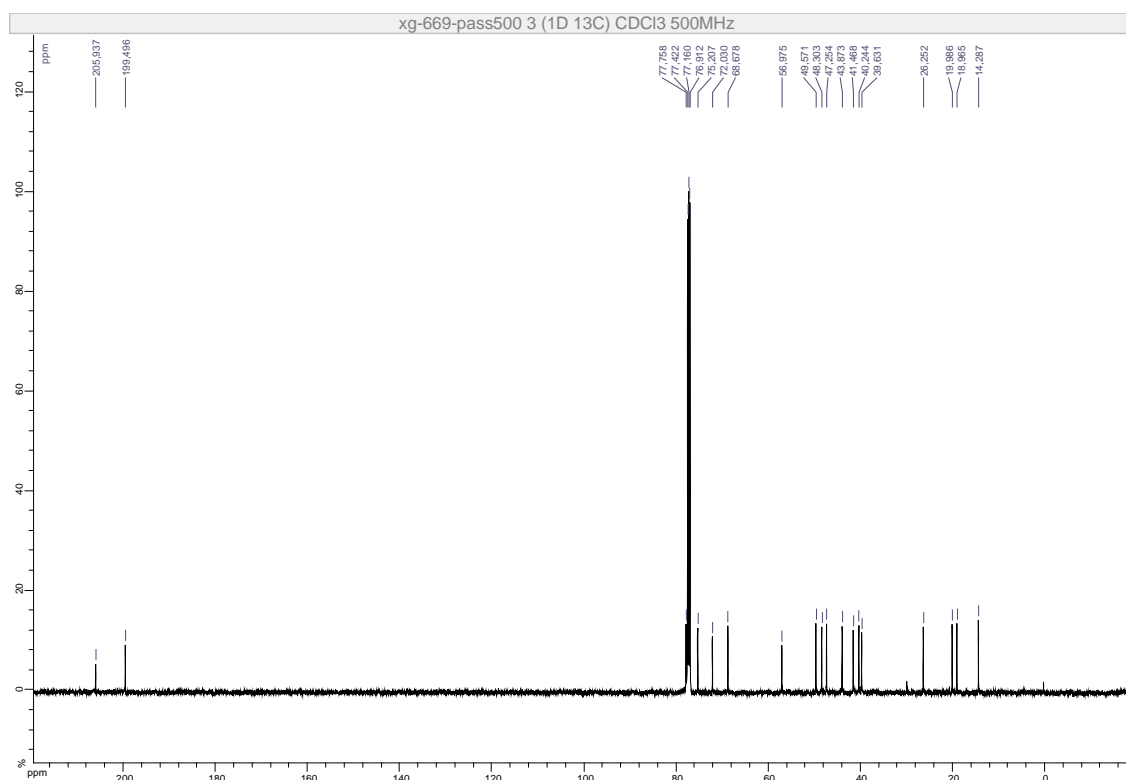

**21**,  $^1\text{H}$  NMR (500 MHz,  $\text{CDCl}_3$ ) and  $^{13}\text{C}$  NMR (125.5 MHz,  $\text{CDCl}_3$ )

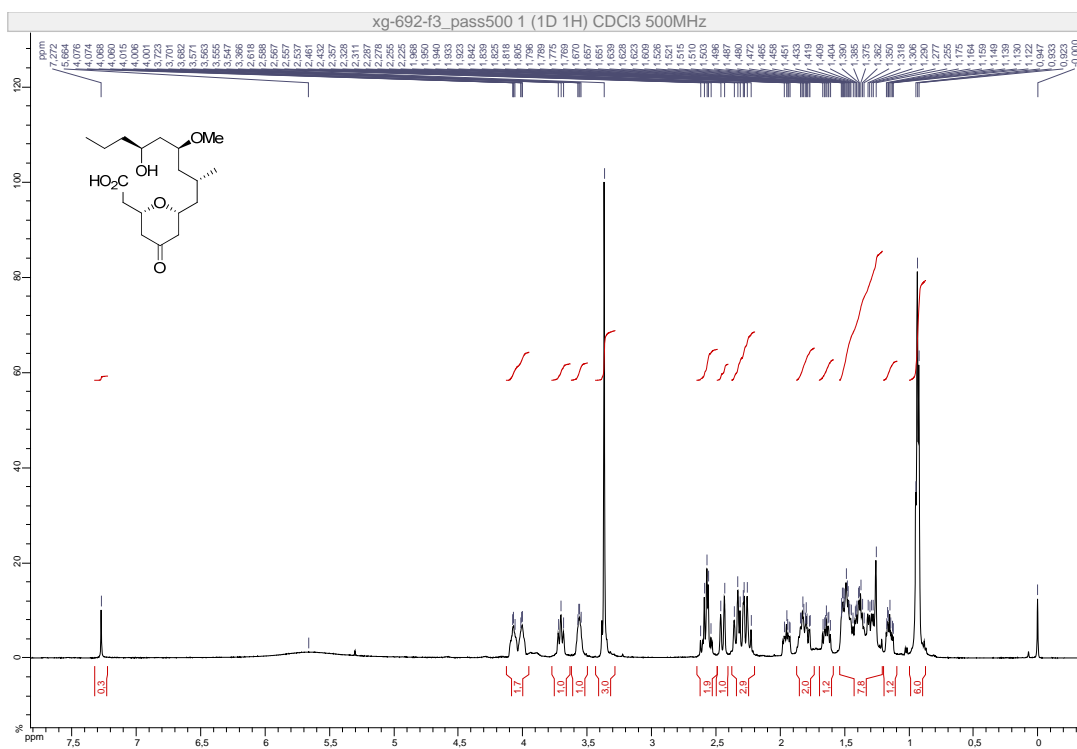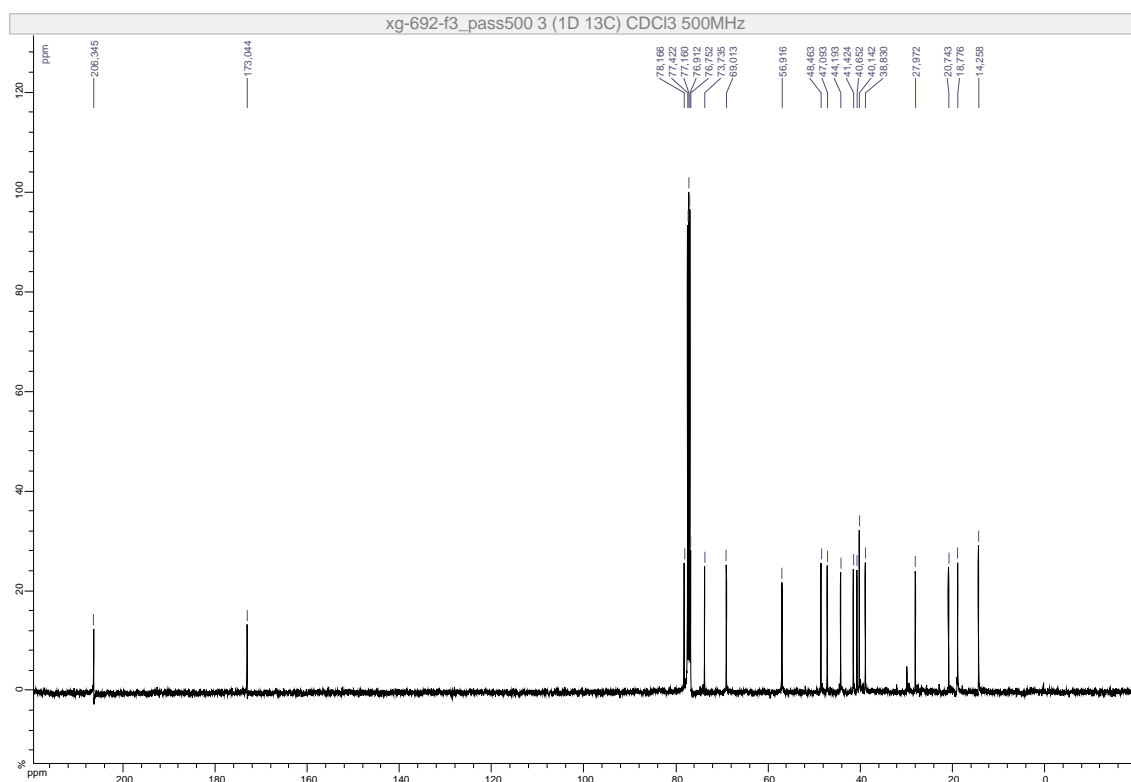

22,  $^1\text{H}$  NMR (500 MHz,  $\text{CDCl}_3$ ) and  $^{13}\text{C}$  NMR (125.5 MHz,  $\text{CDCl}_3$ )

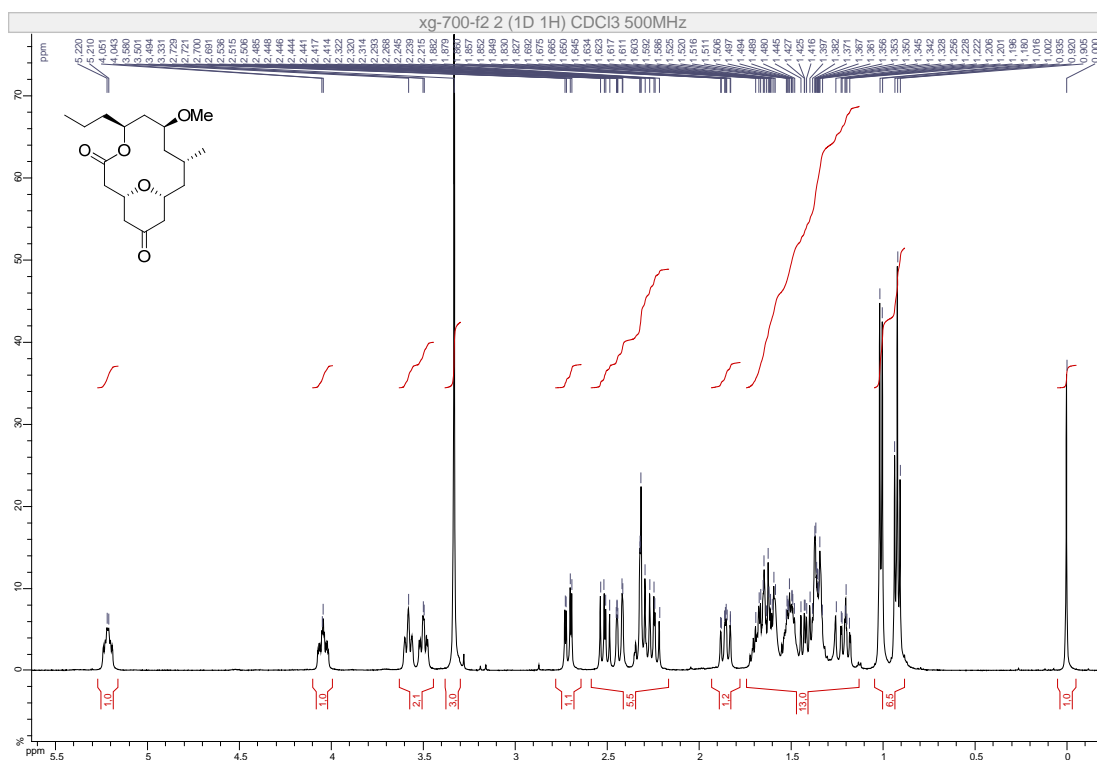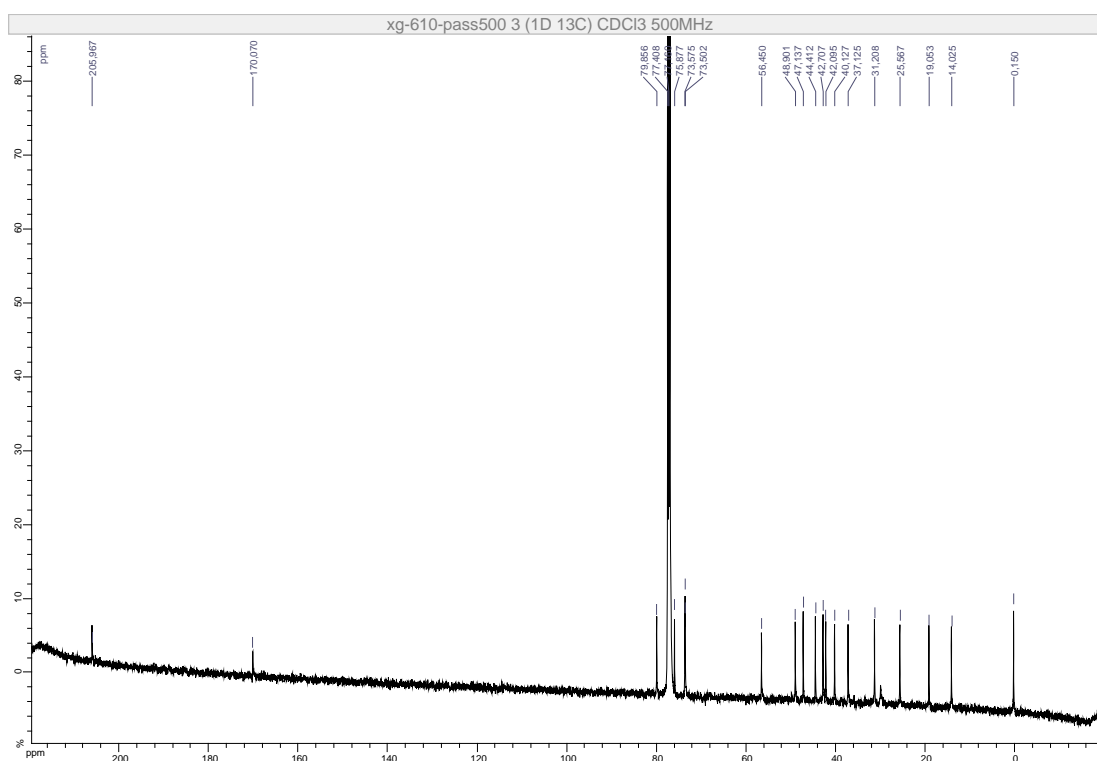

23,  $^1\text{H}$  NMR (500 MHz,  $\text{CDCl}_3$ ) and  $^{13}\text{C}$  NMR (125.5 MHz,  $\text{CDCl}_3$ )

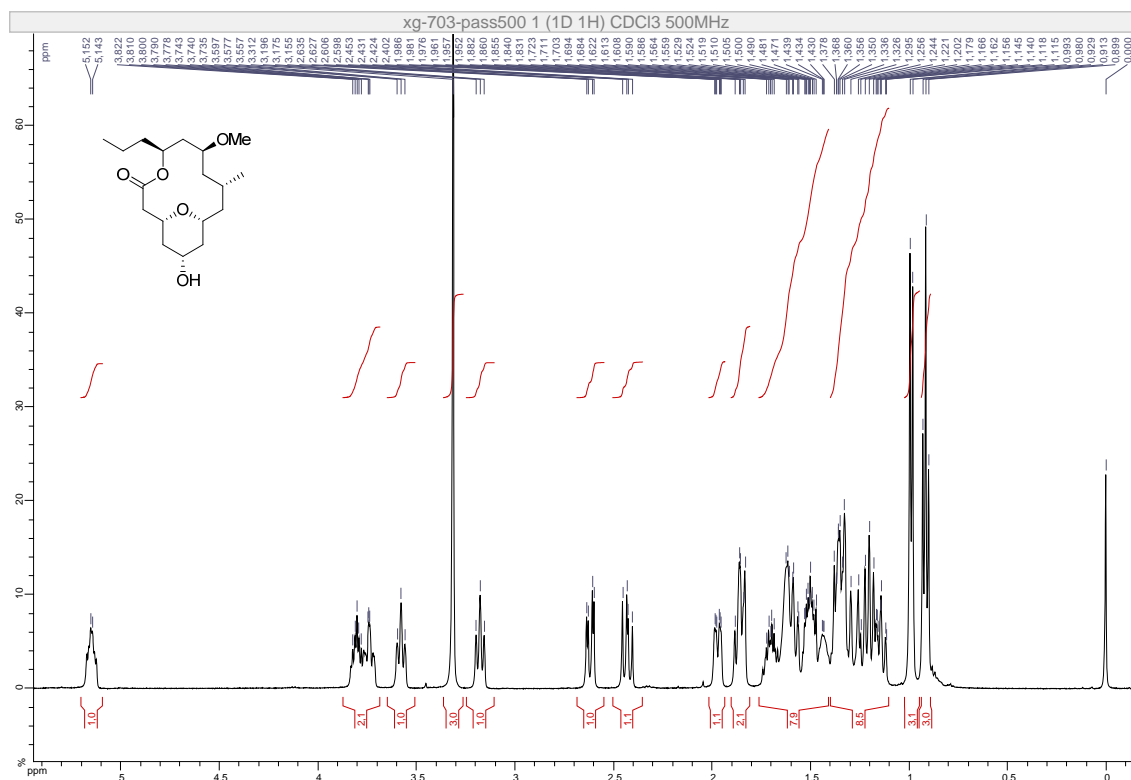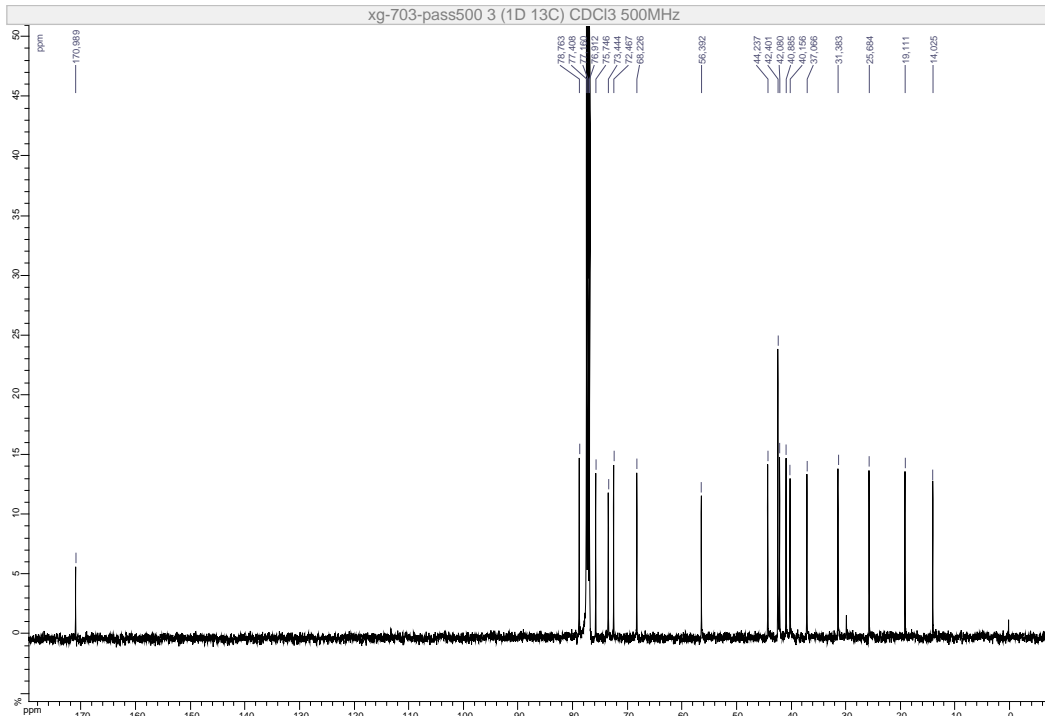



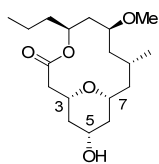

**23**,  $^1\text{H}/^1\text{H}$  NOESY NMR (500 MHz,  $\text{CDCl}_3$ )

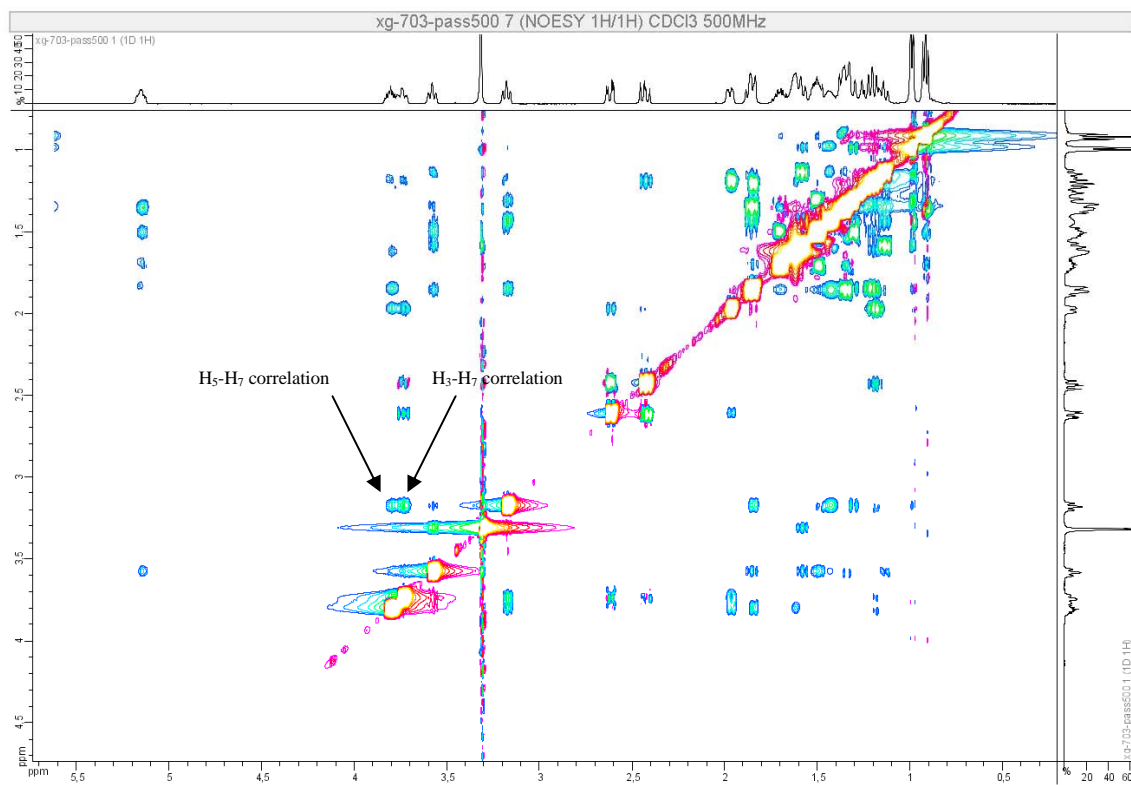

**5-*epi*-23**,  $^1\text{H}$  NMR (300 MHz,  $\text{CDCl}_3$ ) and  $^{13}\text{C}$  NMR (125.5 MHz,  $\text{CDCl}_3$ )

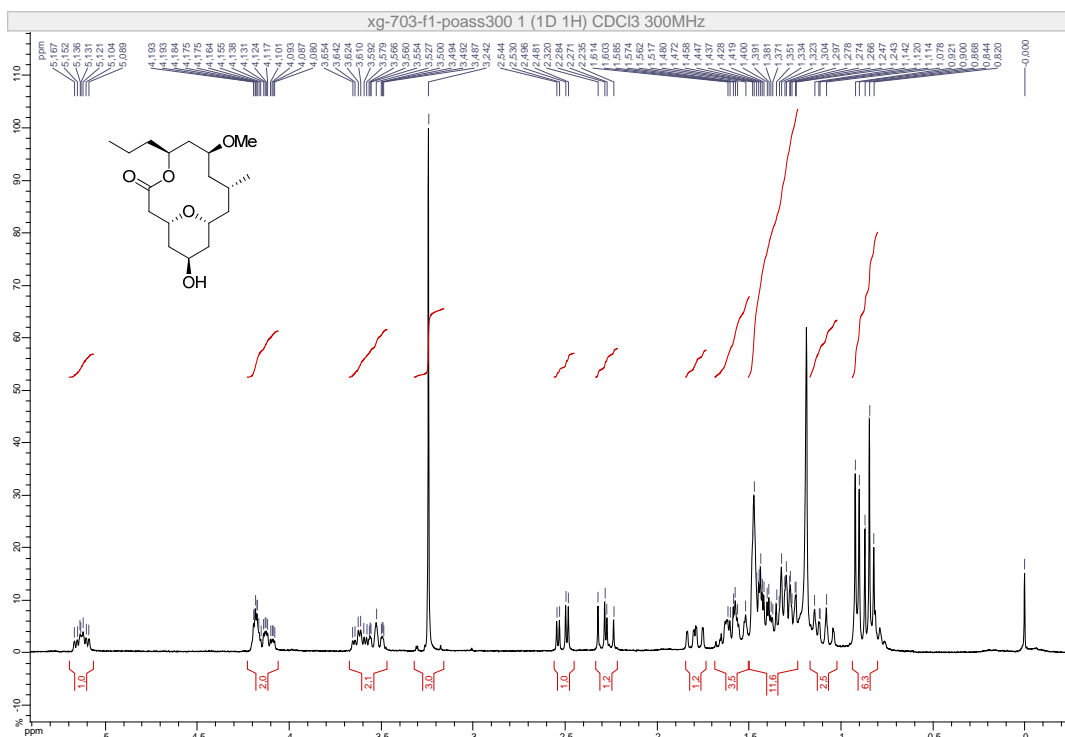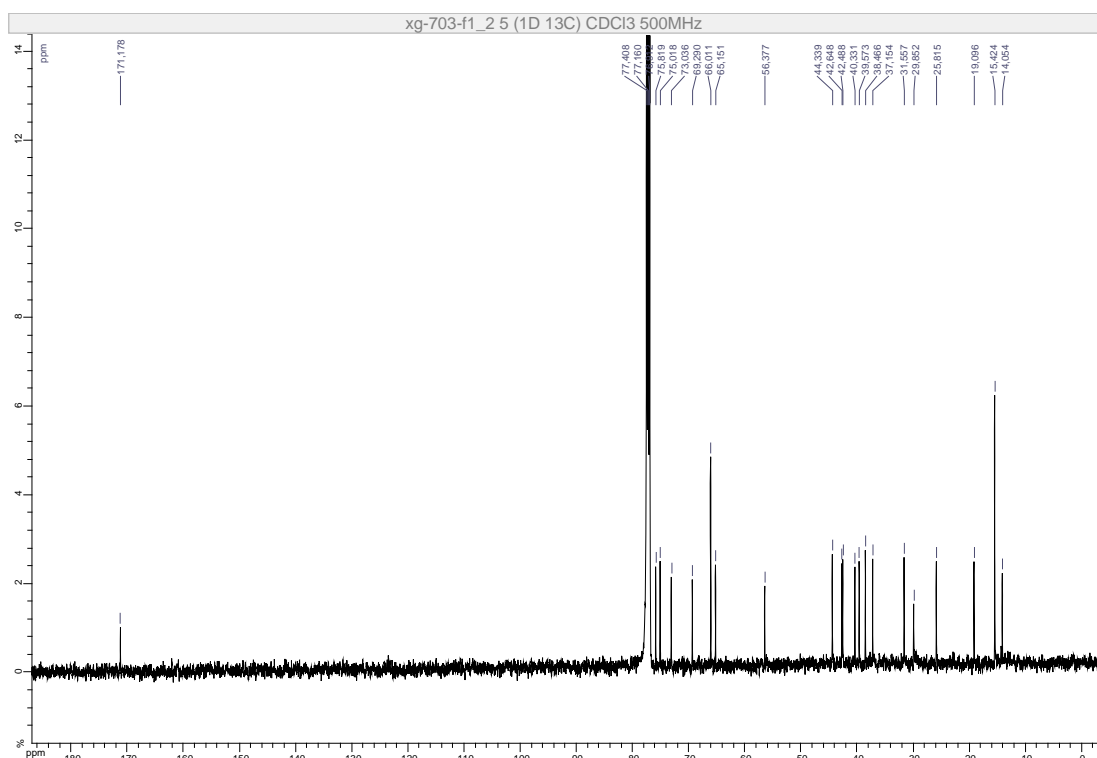

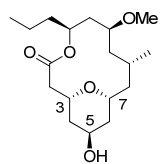

**5-*epi*-23**,  $^1\text{H}/^1\text{H}$  NOESY NMR (500 MHz,  $\text{CDCl}_3$ )

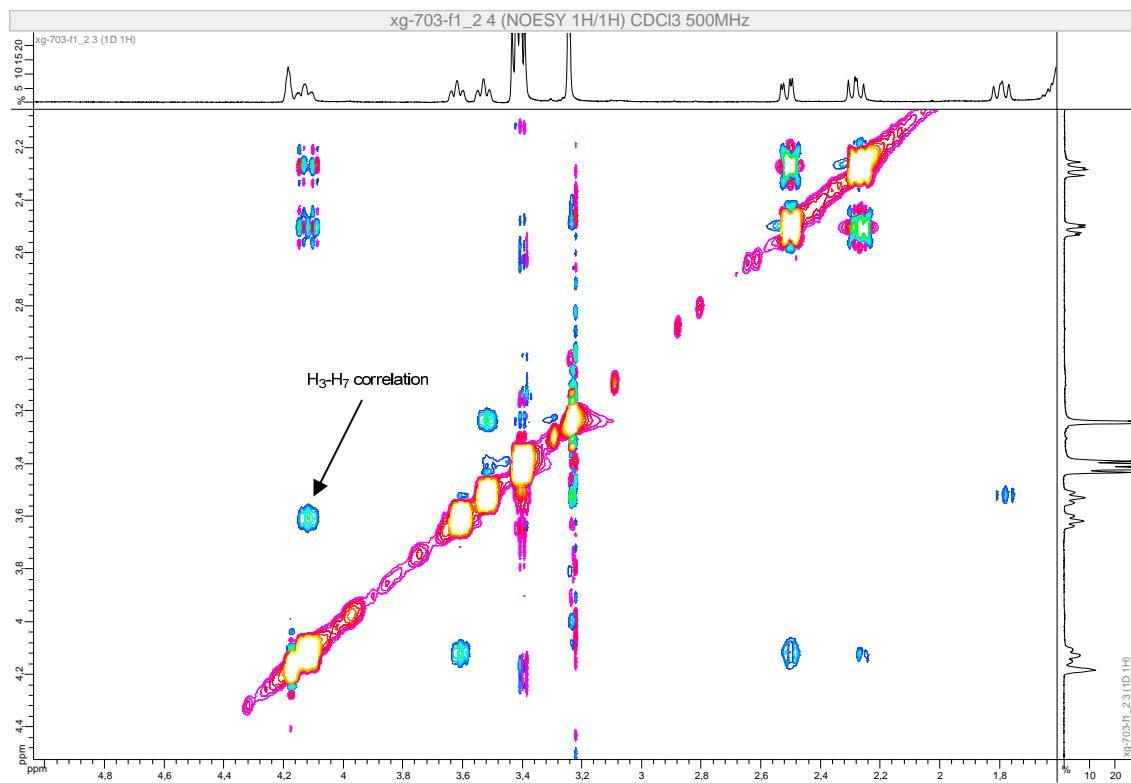

**24,**  $^1\text{H}$  NMR (300 MHz,  $\text{CDCl}_3$ ) and  $^{13}\text{C}$  NMR (75.5 MHz,  $\text{CDCl}_3$ )

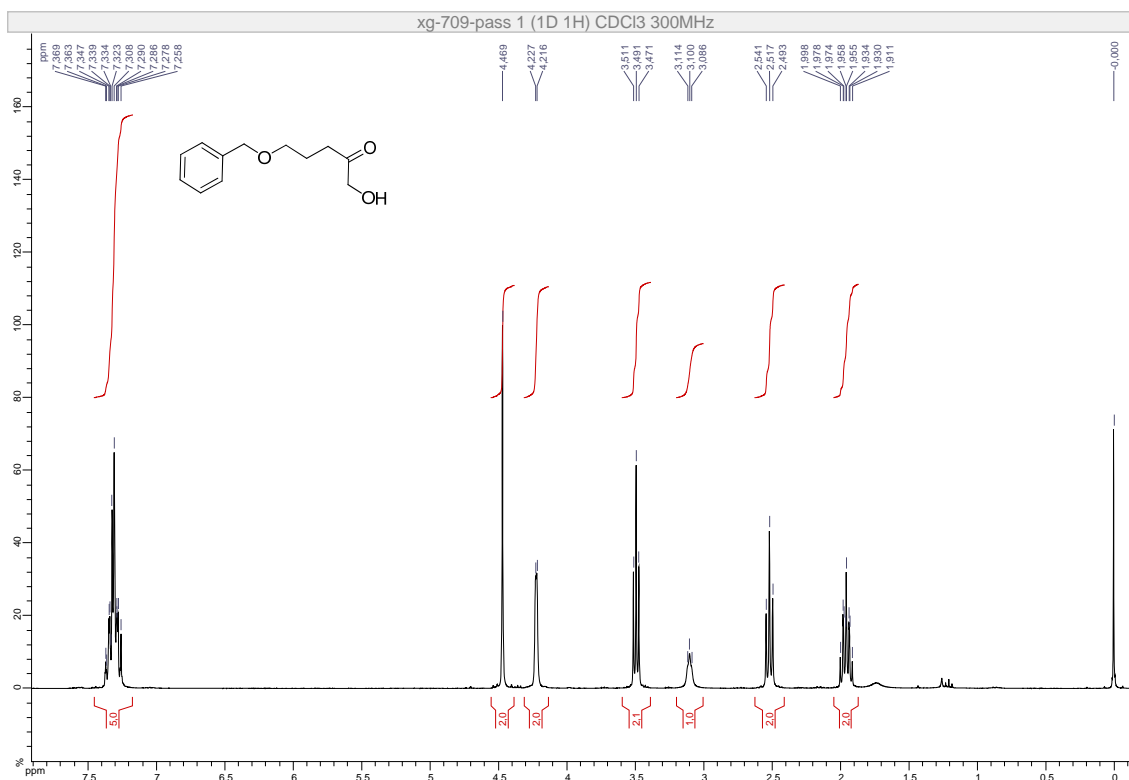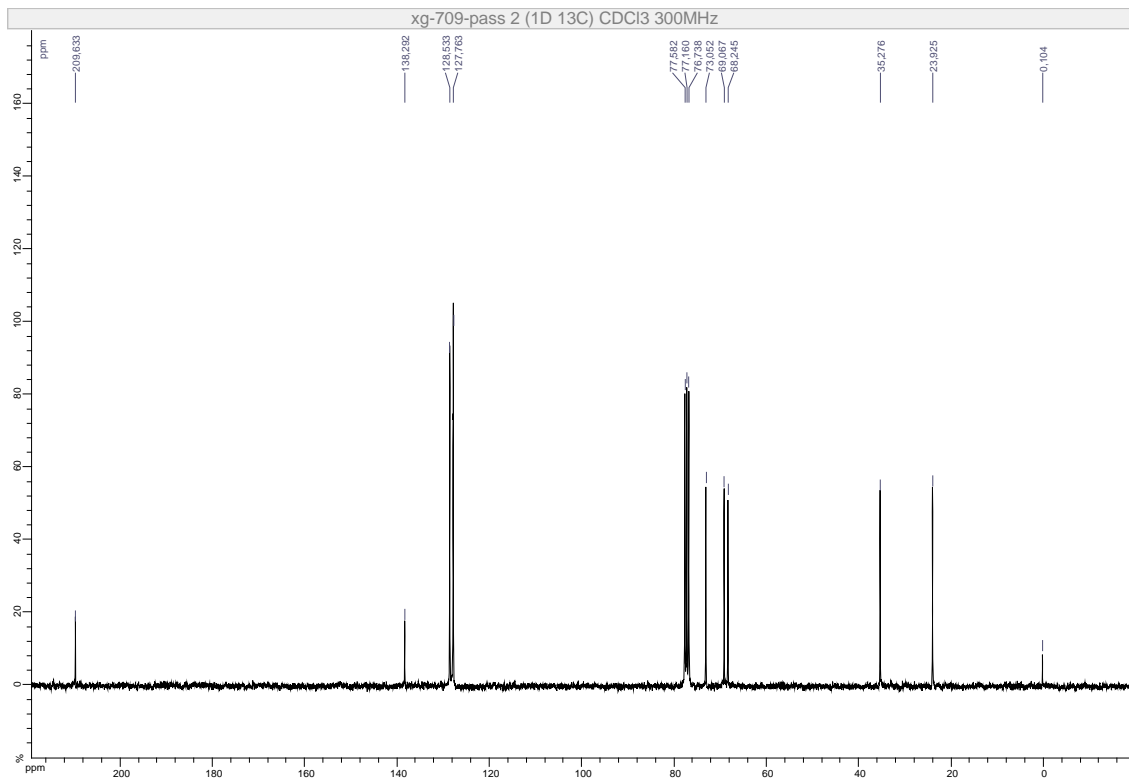

**3**,  $^1\text{H}$  NMR (300 MHz,  $\text{CDCl}_3$ ) and  $^{13}\text{C}$  NMR (75.5 MHz,  $\text{CDCl}_3$ )

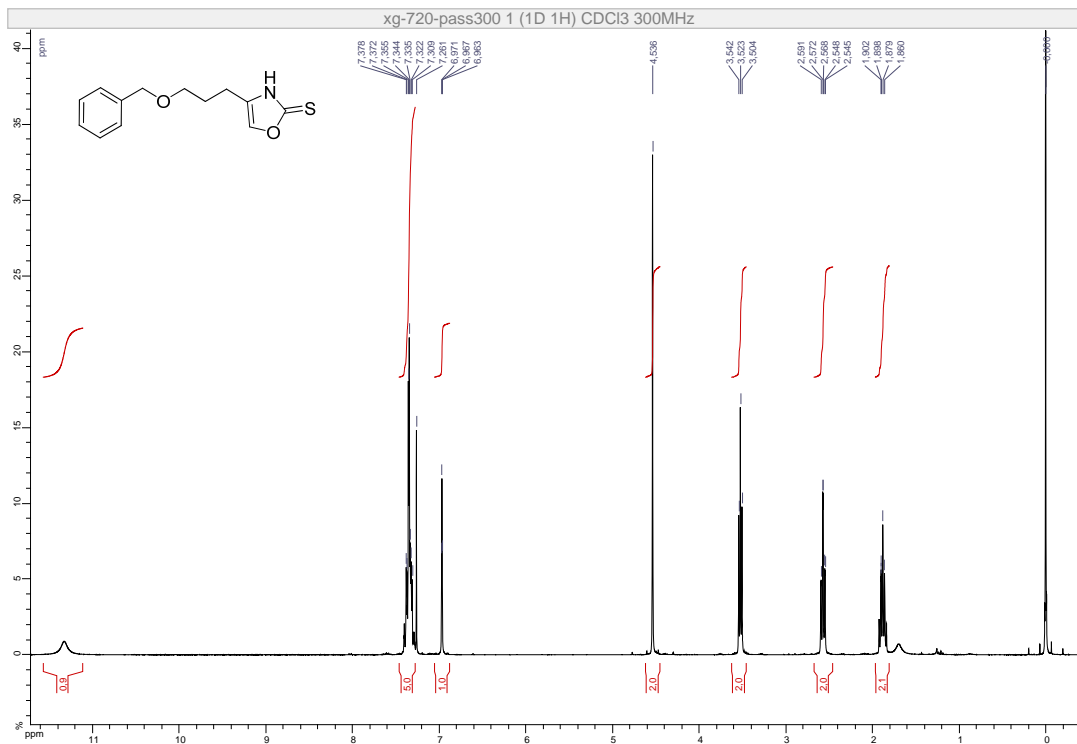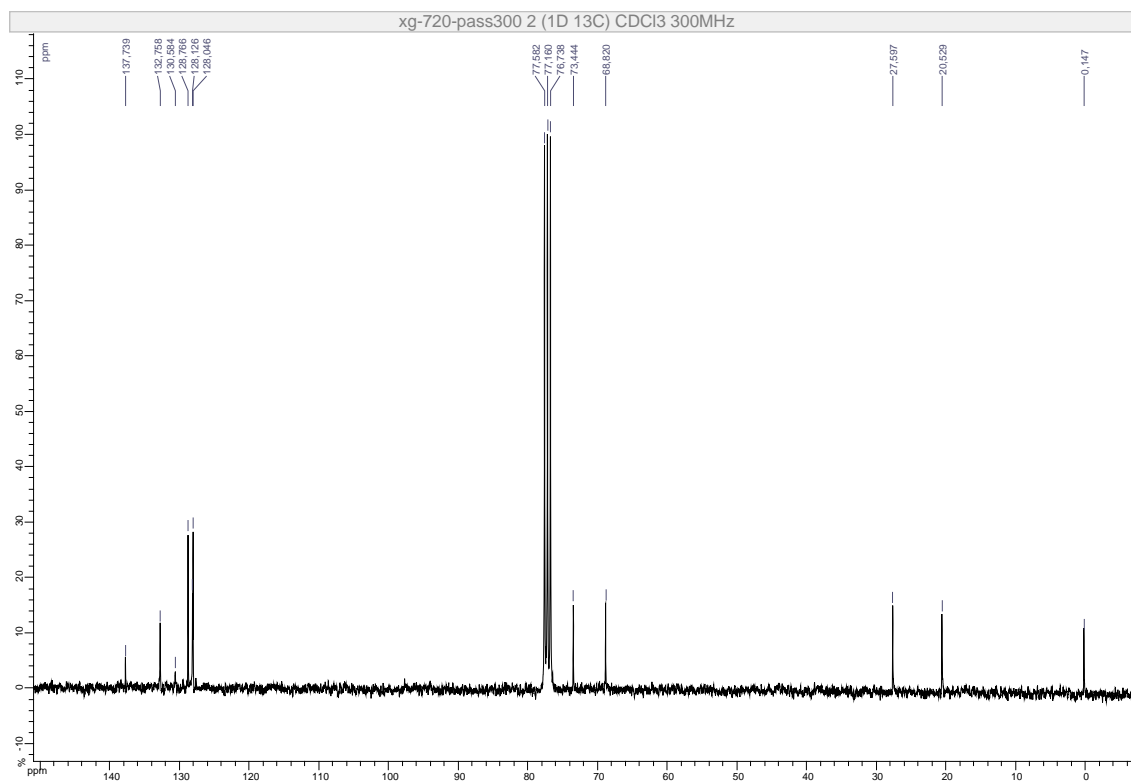

**25**,  $^1\text{H}$  NMR (500 MHz,  $\text{CDCl}_3$ ) and  $^{13}\text{C}$  NMR (75.5 MHz,  $\text{CDCl}_3$ )

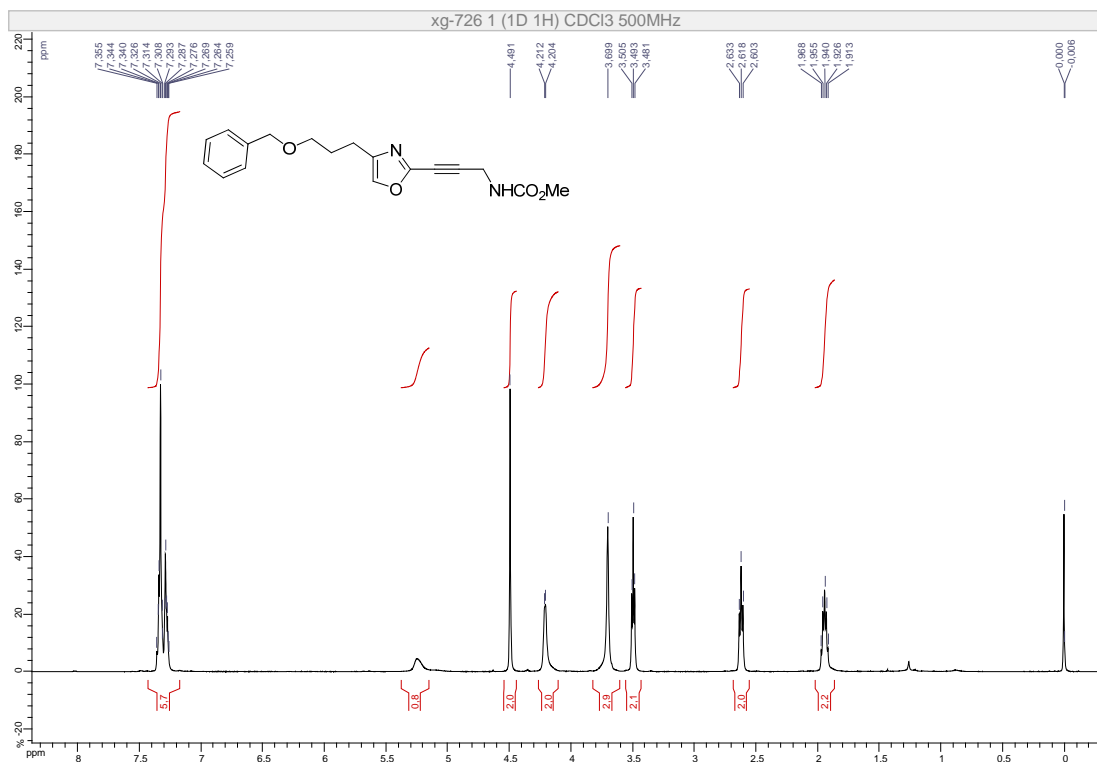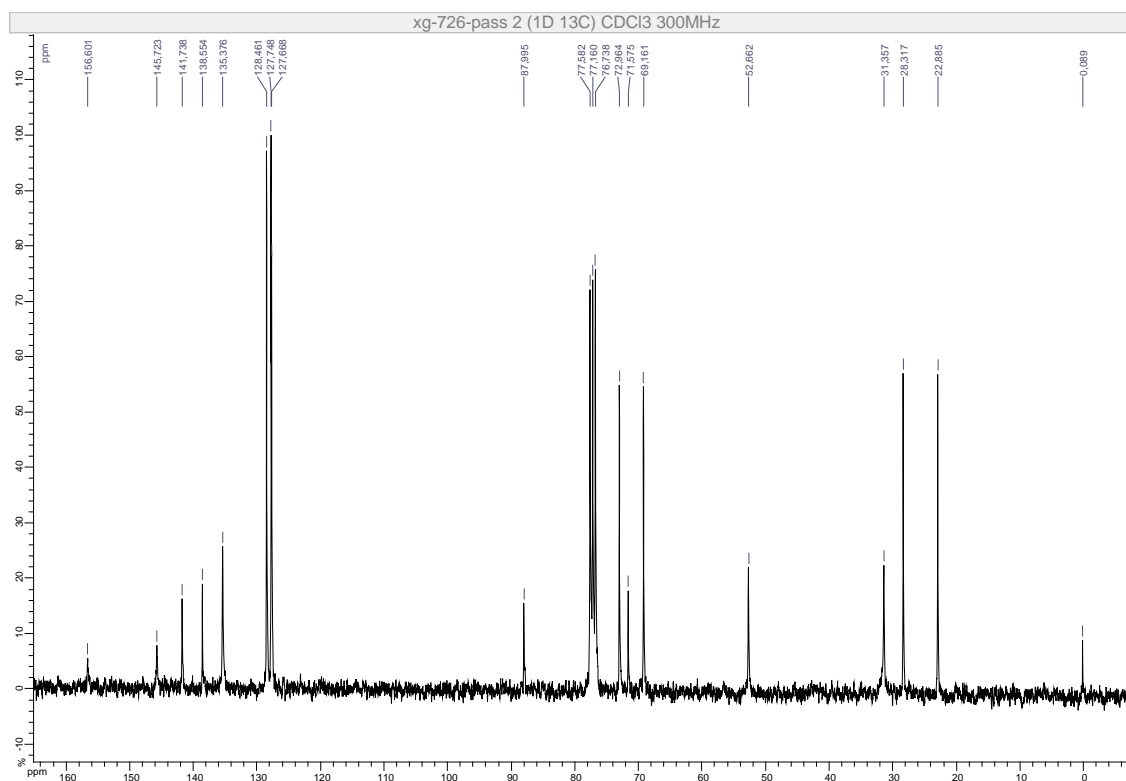

26,  $^1\text{H}$  NMR (300 MHz,  $\text{CDCl}_3$ ) and  $^{13}\text{C}$  NMR (75.5 MHz,  $\text{CDCl}_3$ )

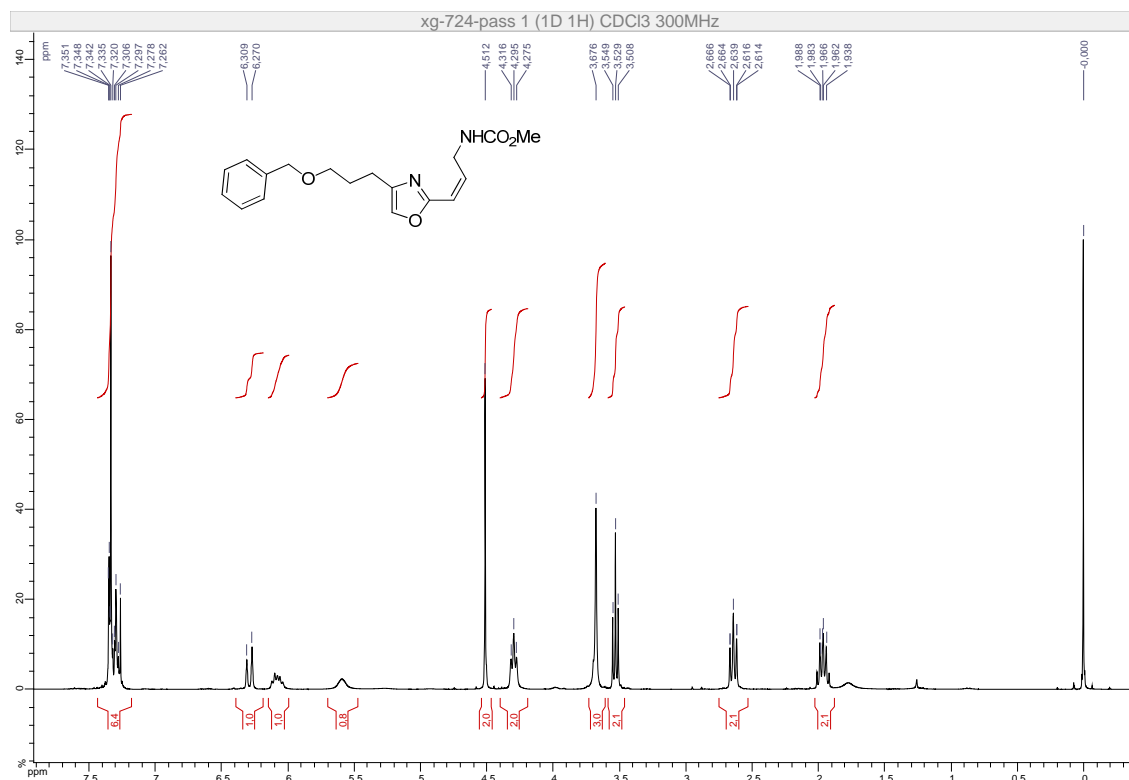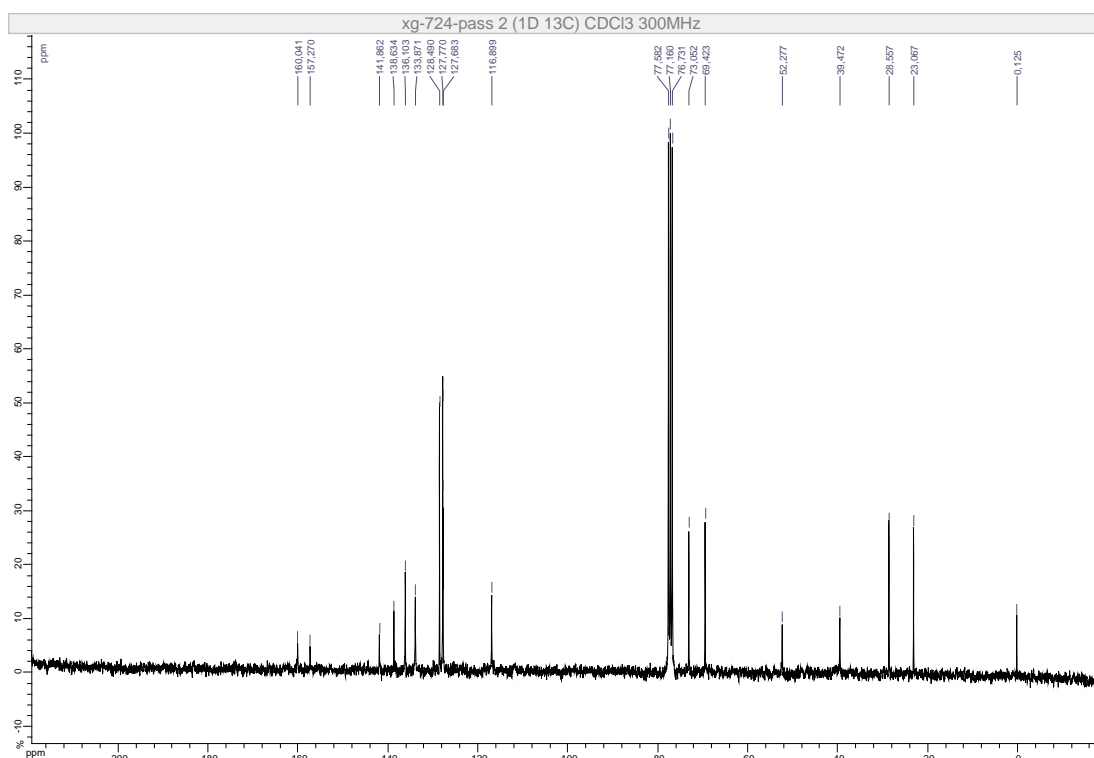

27,  $^1\text{H}$  NMR (500 MHz,  $\text{CDCl}_3$ ) and  $^{13}\text{C}$  NMR (75.5 MHz,  $\text{CDCl}_3$ )

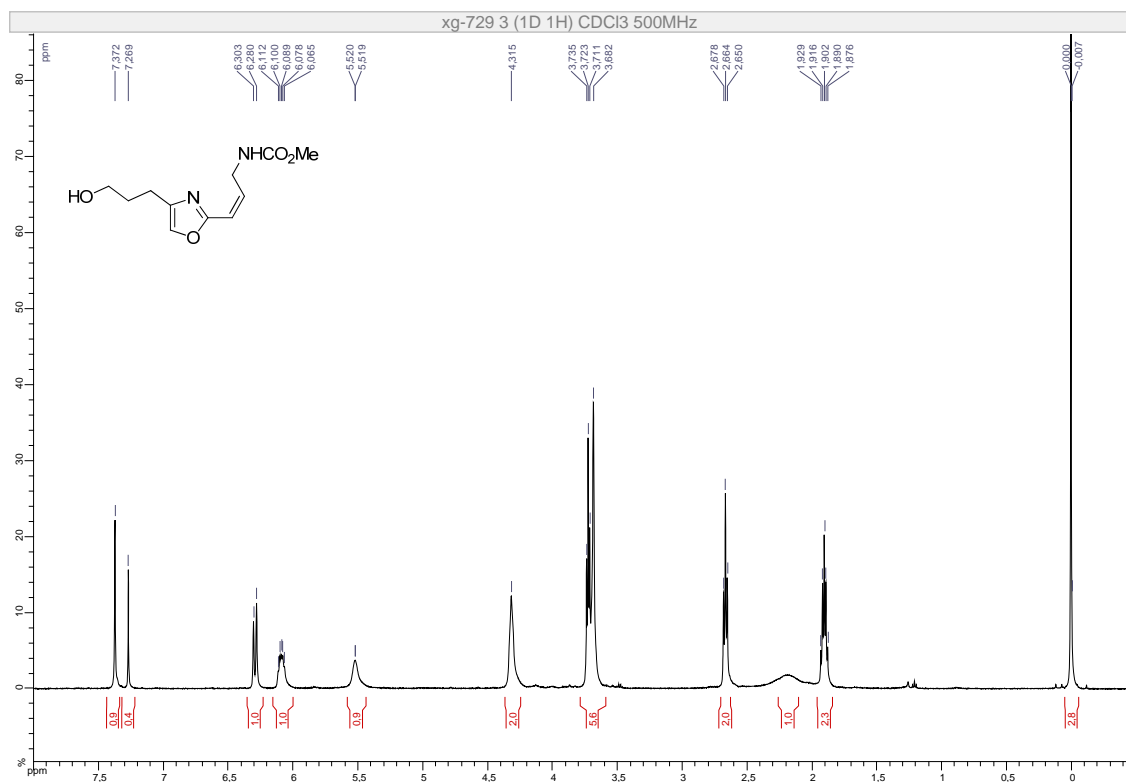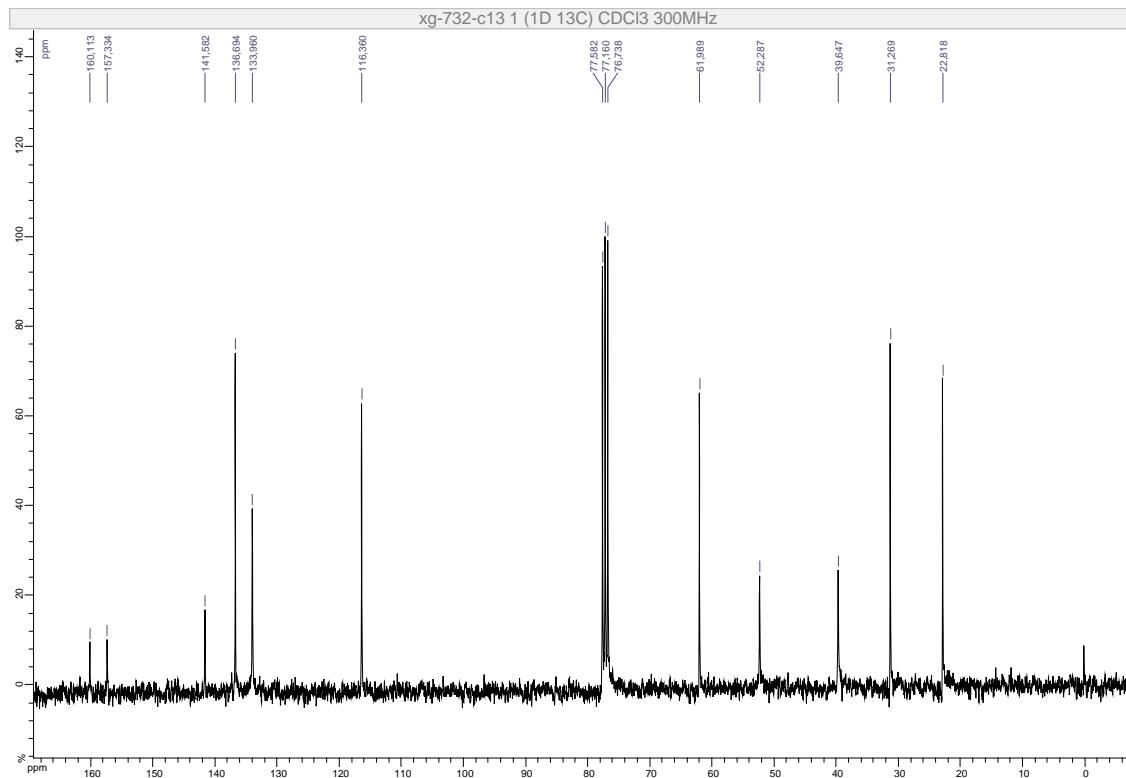



**28,**  $^1\text{H}$  NMR (300 MHz,  $\text{CDCl}_3$ ) and  $^{13}\text{C}$  NMR (75.5 MHz,  $\text{CDCl}_3$ ,  $D_1 = 1.2$  s)

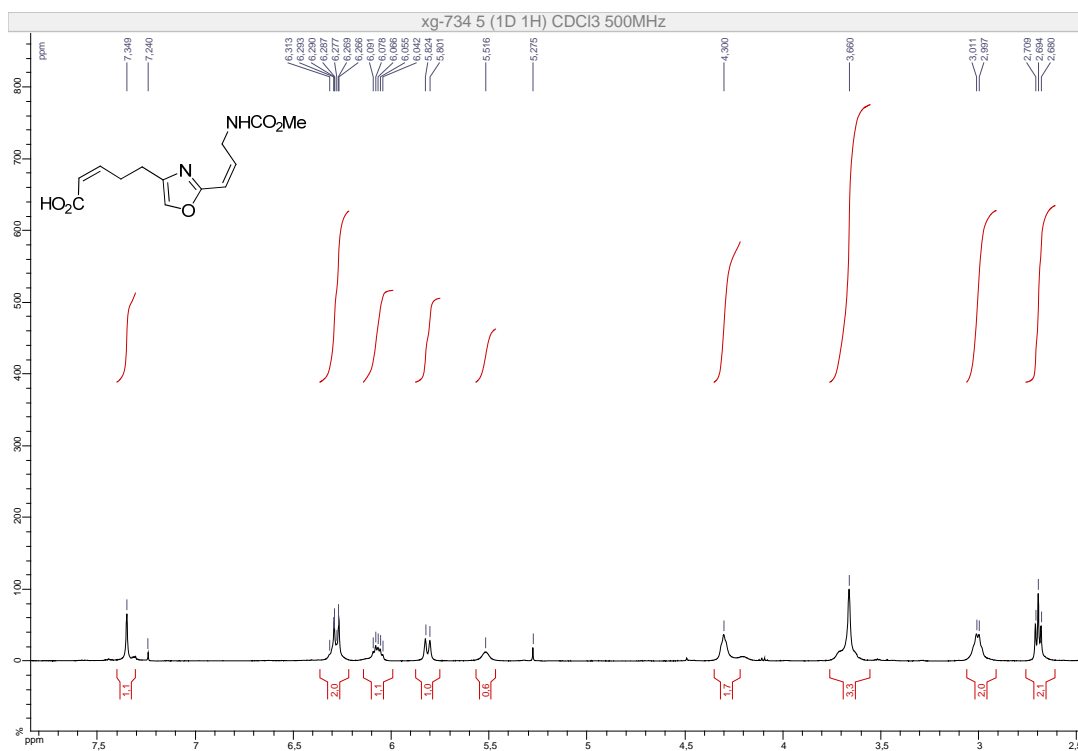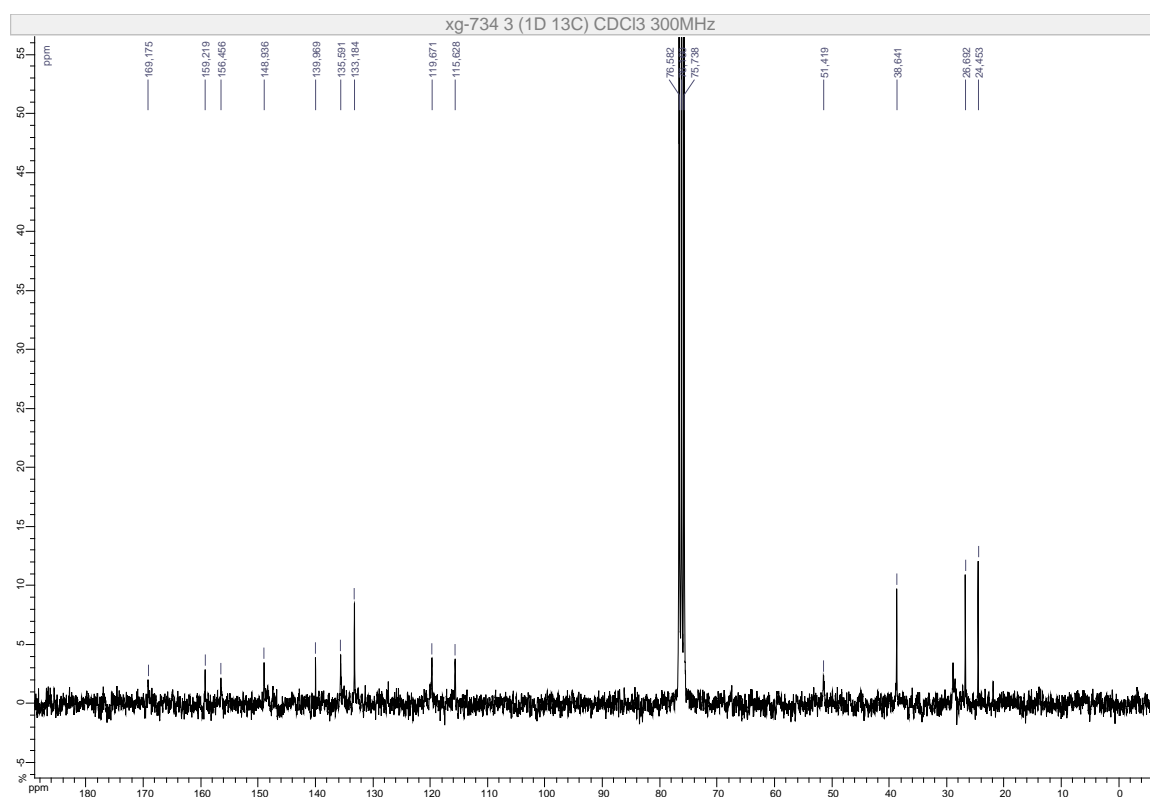

(+)-neopeltolide (**1**),  $^1\text{H}$  NMR (500 MHz,  $\text{CD}_3\text{OD}$ )

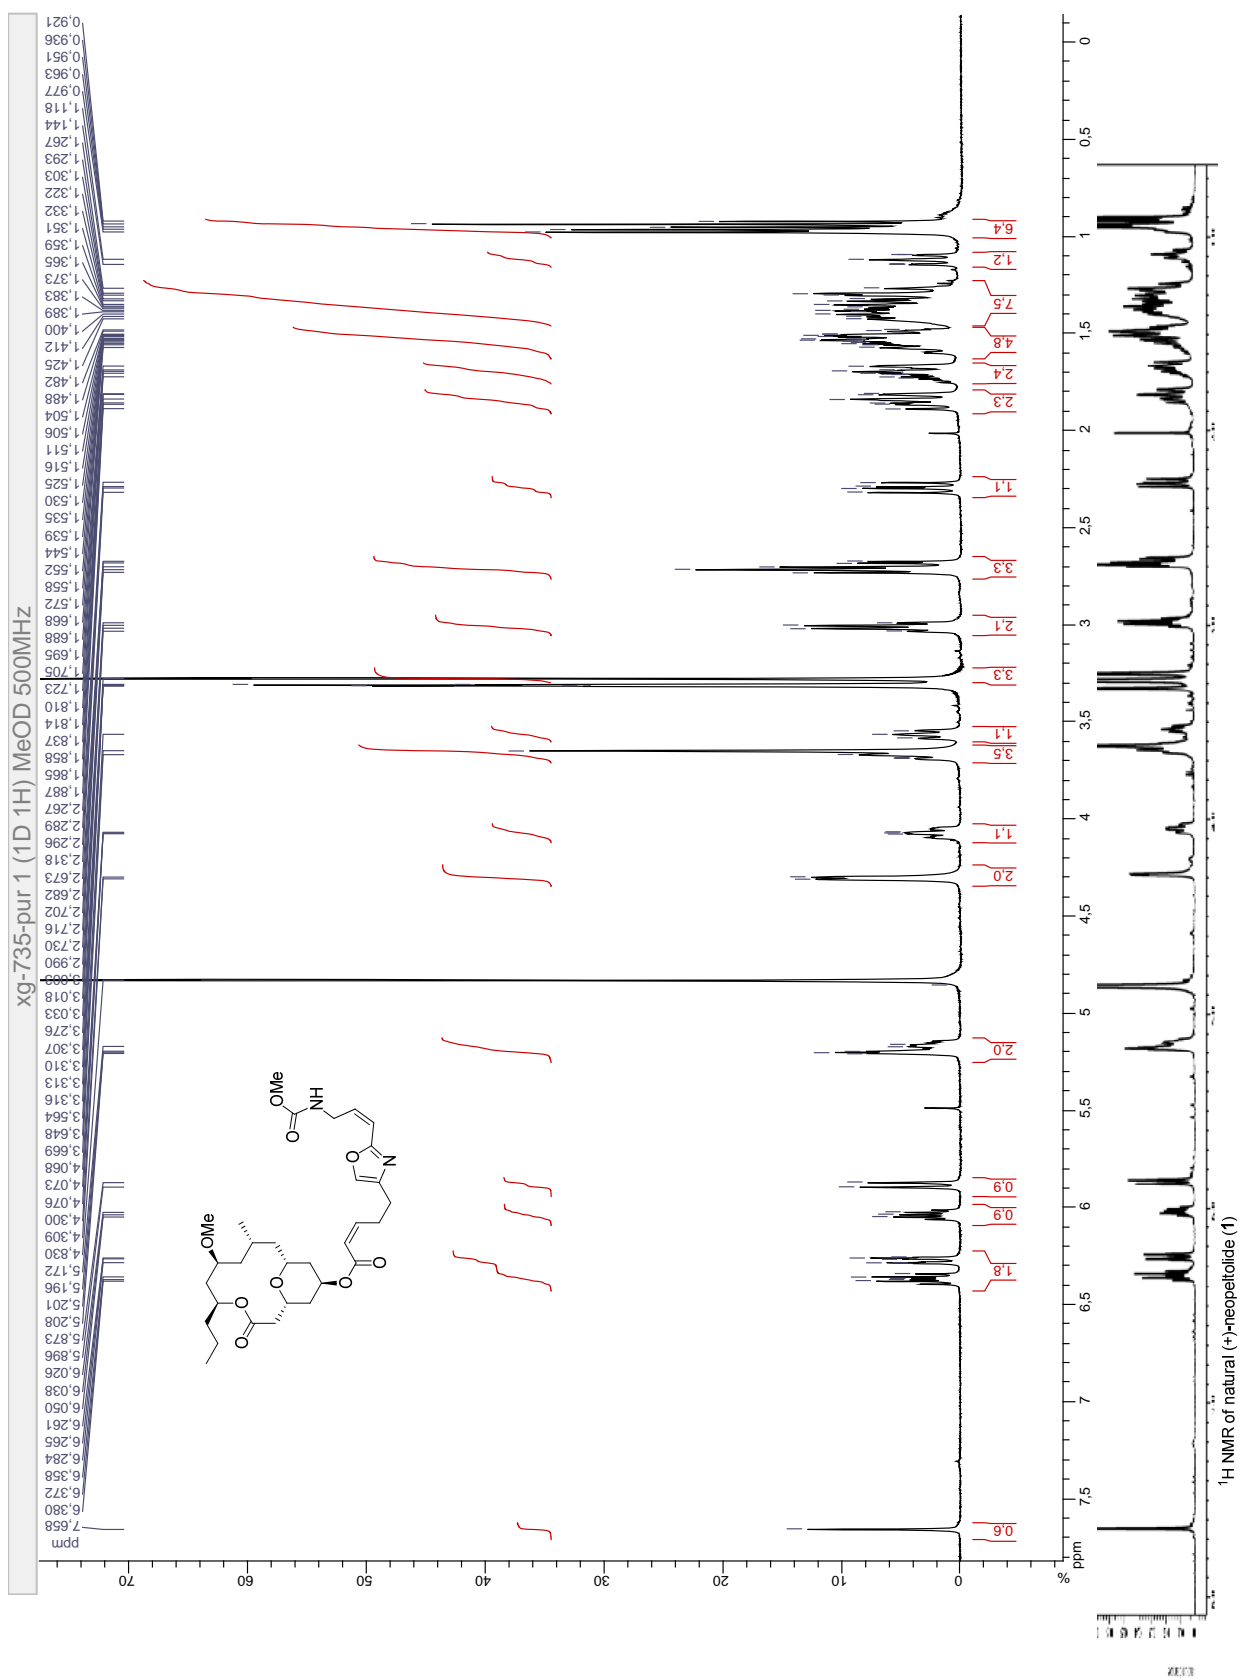

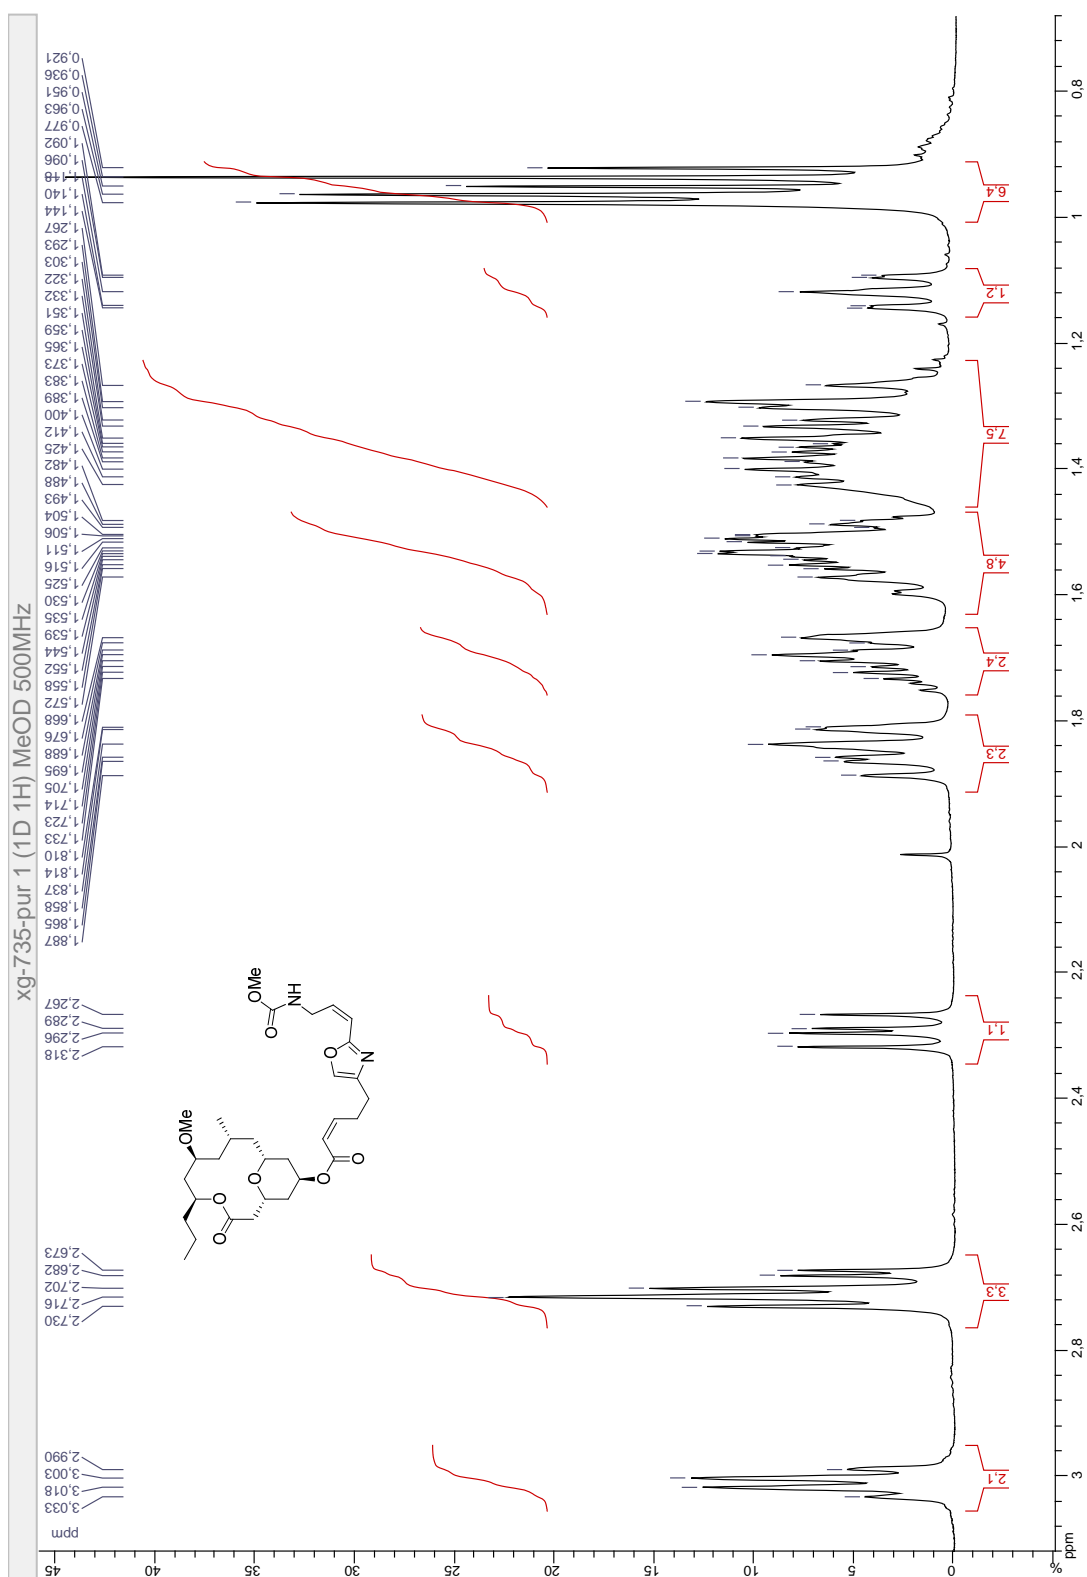

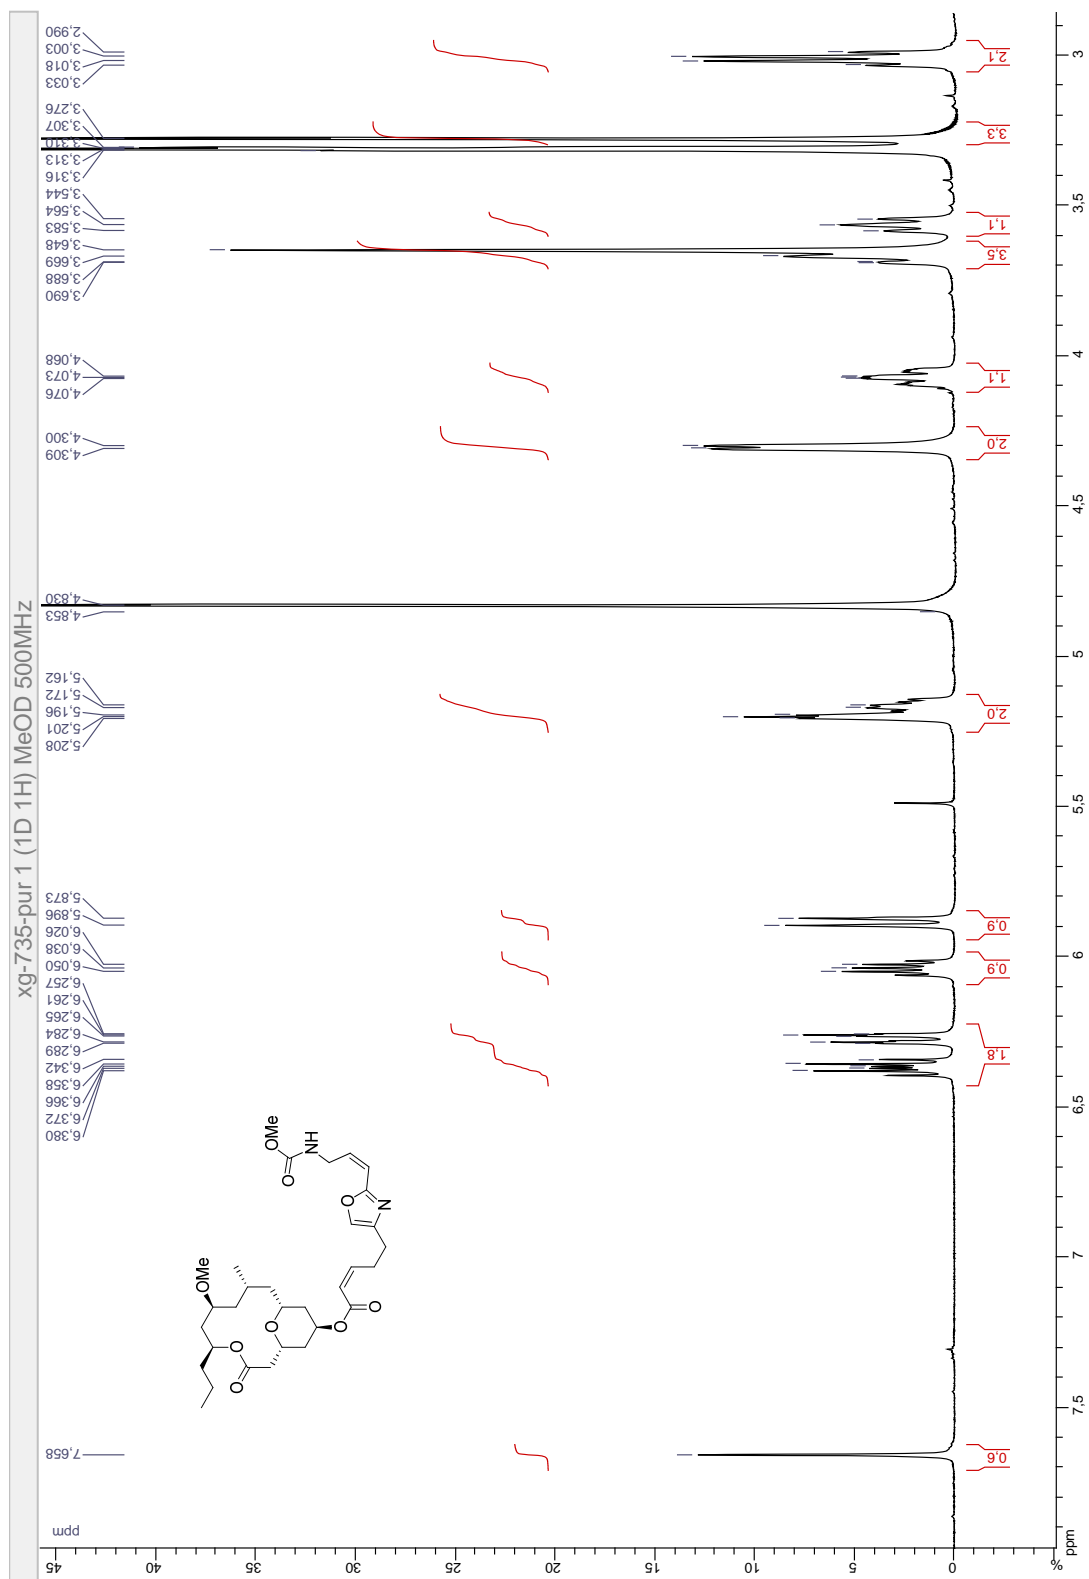

(+)-neopeltolide (**1**),  $^{13}\text{C}$  NMR (125 MHz,  $\text{CD}_3\text{OD}$ ) and DEPT 135

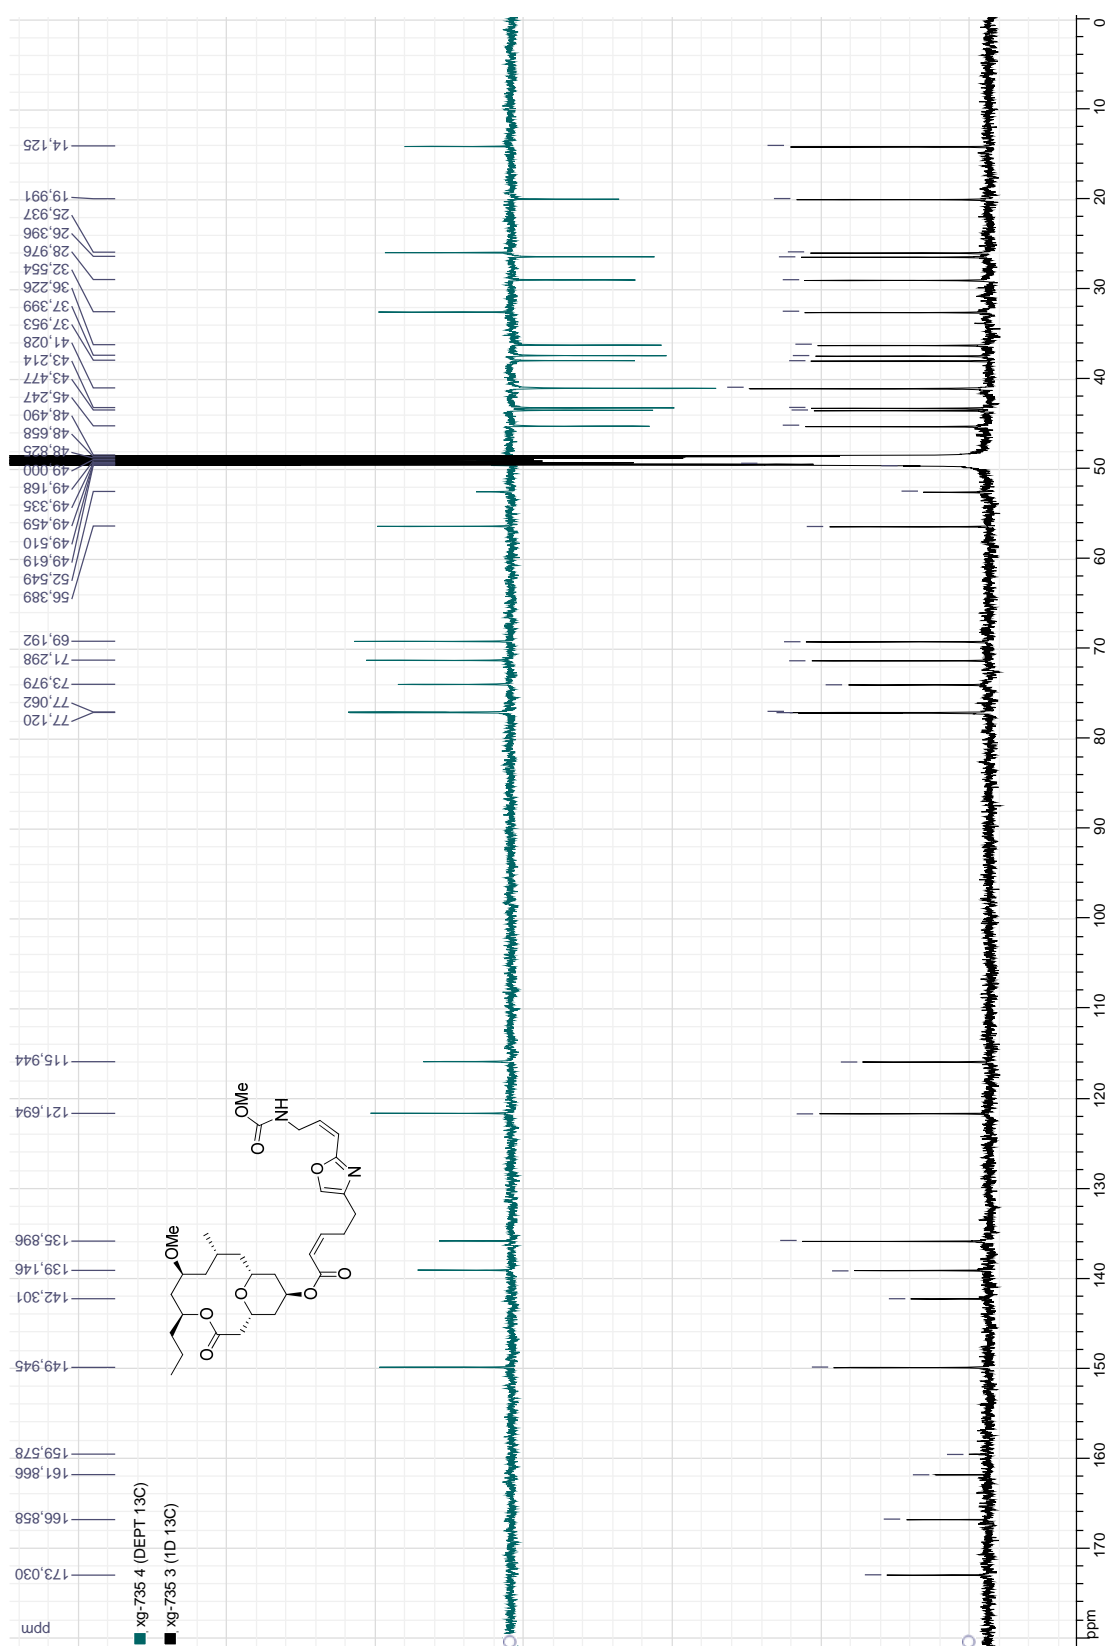

Supplement: Supplementary file 1 [file 4518979]
